# Supplementary material for: A novel rubber tree PR-10 protein involved in host-defense response against the white root rot fungus Rigidoporus microporus
Source: PubMed Central journal article supplement (PMC10032002; doi:10.1186/s12870-023-04149-3), 2023-03-22
Supplement: 12870_2023_4149_MOESM1_ESM.pdf [file 12870_2023_4149_MOESM1_ESM.pdf]

# **Supplementary Figures**

## Supplementary Figure 1:

### The phenotypes of mock- and *R. microporus*-inoculated rubber tree

1.1) The aboveground phenotypes of the representative tree of mock-inoculated (control) and *R. microporus*-inoculated at 10, 30, and 50 DAI

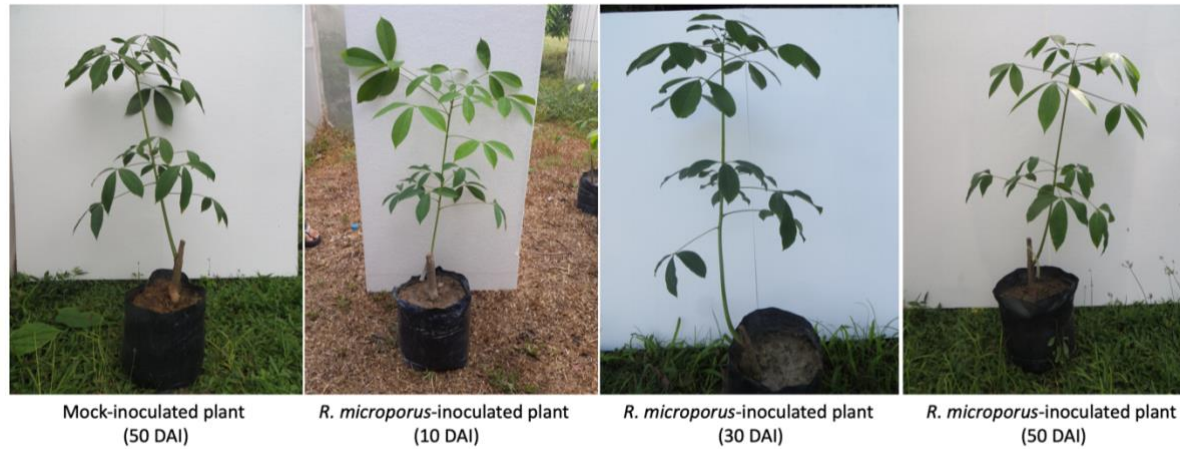

1.2) The underground phenotypes of the representative tree of mock-inoculated (control) and three biological replicates of *R. microporus*-inoculated at 10, 30, and 50 DAI. The yellow arrows indicate the white rhizomorph of the fungal infection

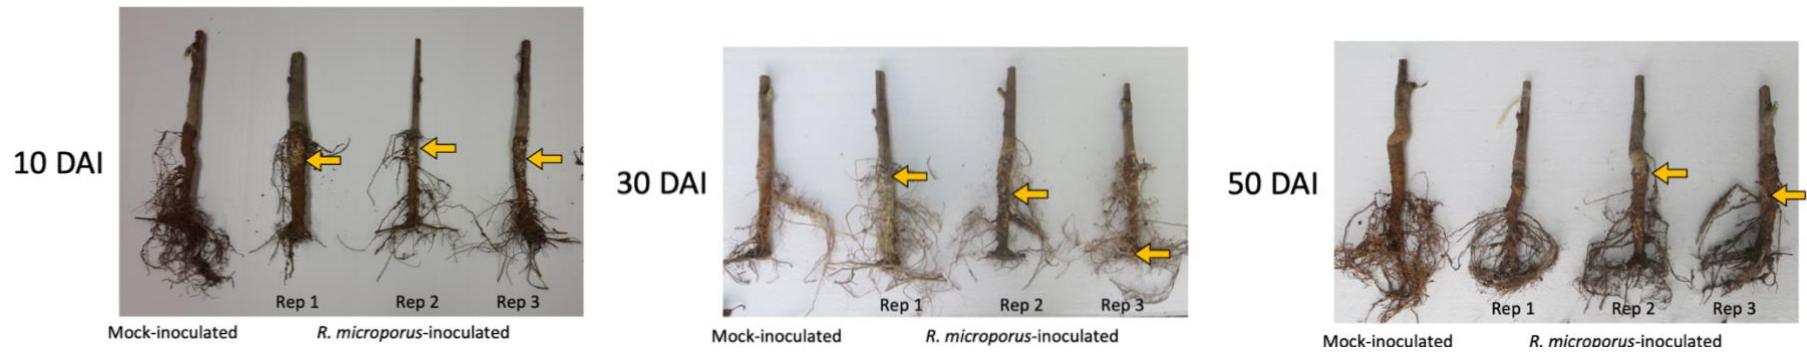

## Supplementary Figure 2:

**Raw Image of One-dimensional (1D) SDS-PAGE gel** showed the comparison of the protein patterns of rubber tree leaves after *R. microporus* inoculation by SDS-PAGE with Coomassie brilliant blue (CBB) dye. Lane 1: protein marker; Lanes 2, 4, 6: mock inoculation at 10, 30, and 50 days after inoculation (DAI), respectively; Lanes 3, 5, 7: *R. microporus*-inoculation at 10, 30, and 50 DAI, respectively.

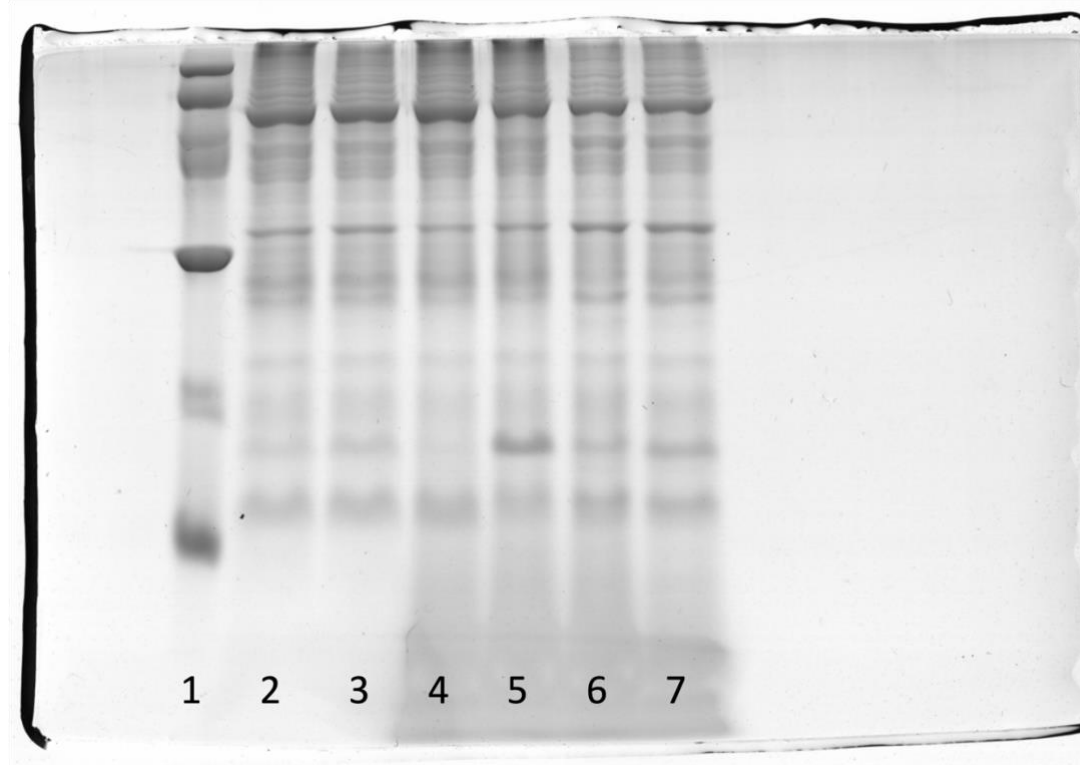

### Supplementary Figure 3:

**Raw Image of Two-dimensional (2D) SDS-PAGE gels.** The three replicates of 2D SDS-PAGE of each treatment are showed below. The framed gels are the representative gels of each treatment.

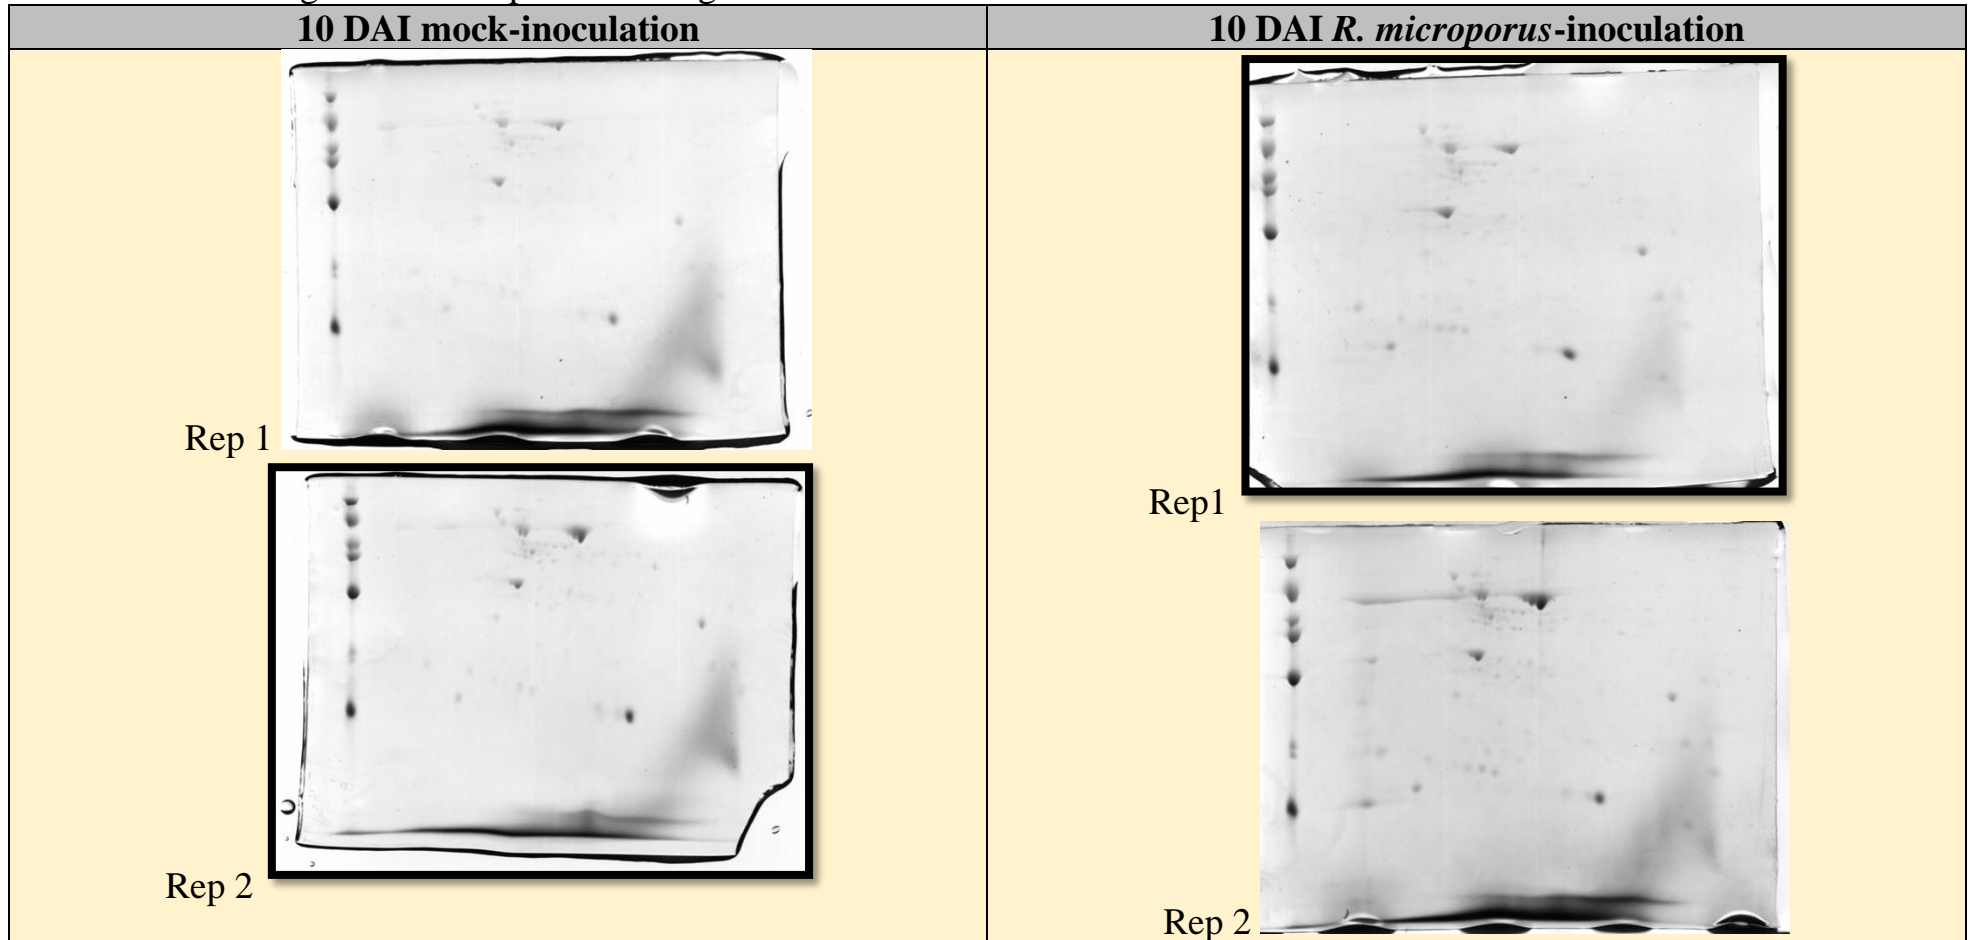

**10 DAI mock-inoculation**

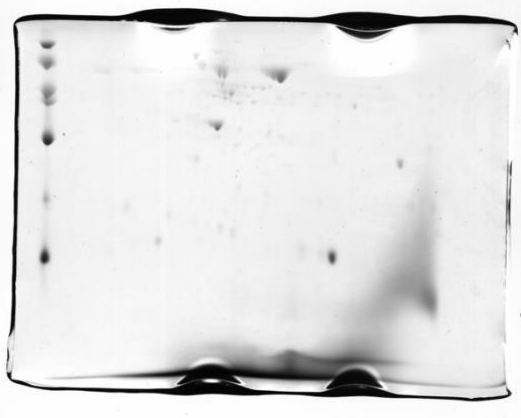

Rep 3

**10 DAI *R. microporus*-inoculation**

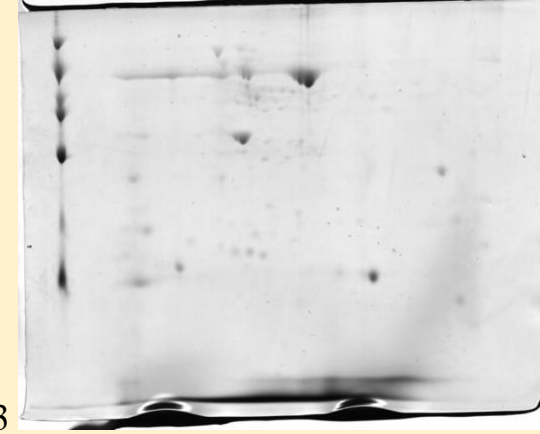

Rep 3

**30 DAI mock-inoculation**

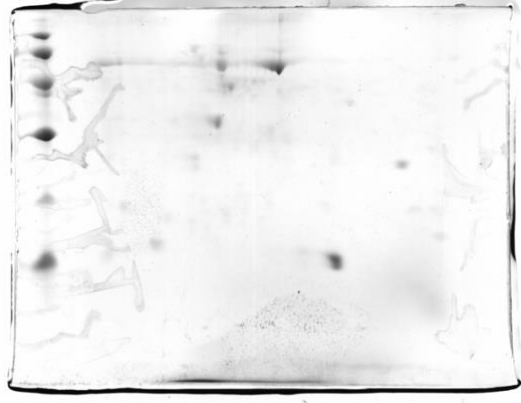

Rep 1

**30 DAI *R. microporus*-inoculation**

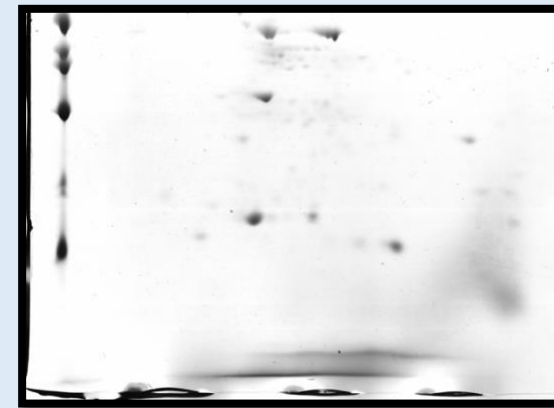

Rep 1

**30 DAI mock-inoculation**

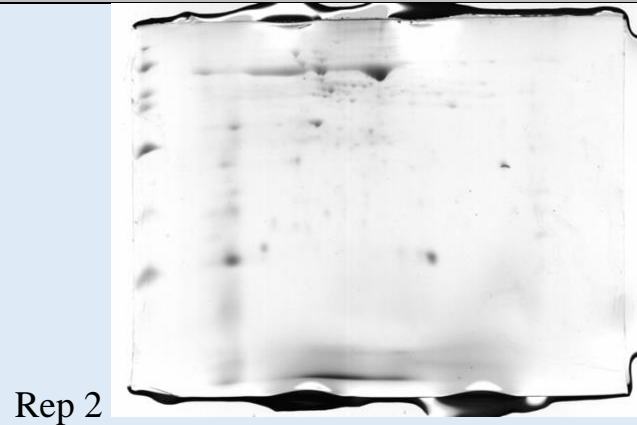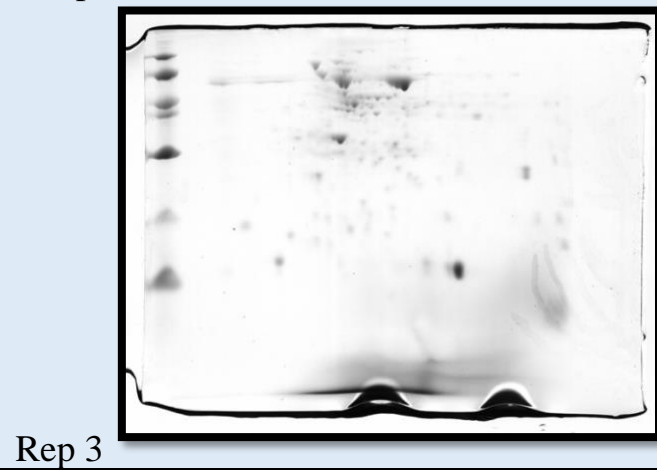

**30 DAI *R. microporus*-inoculation**

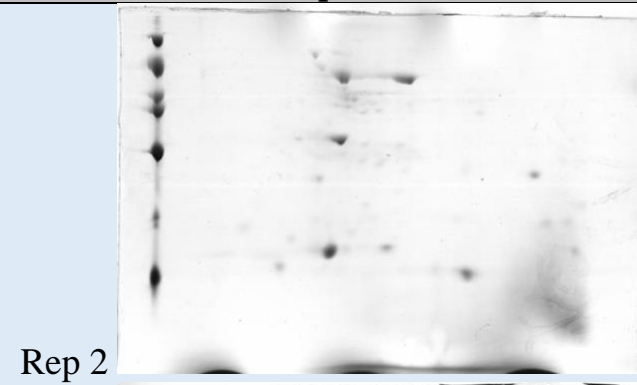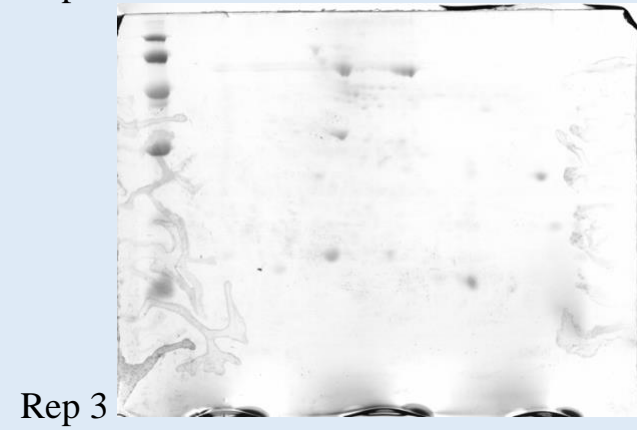

**50 DAI mock-inoculation**

Rep 1

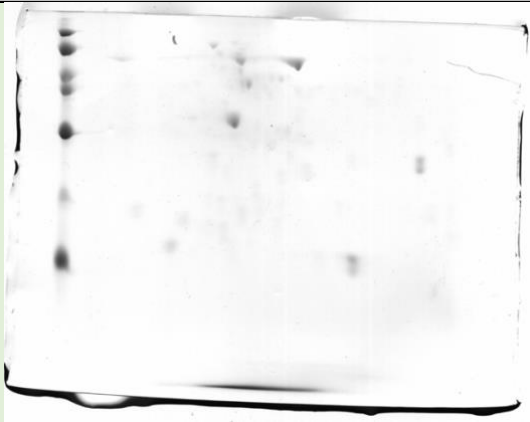

Rep 2

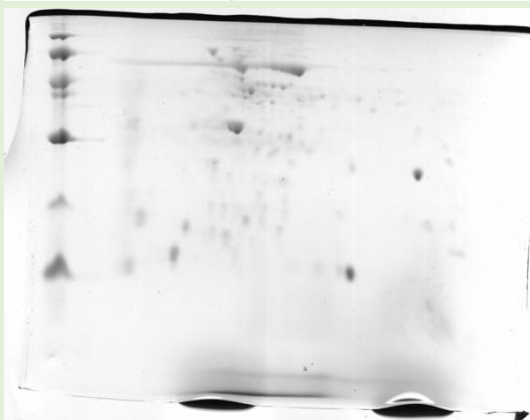

**50 DAI *R. microporus*-inoculation**

Rep 1

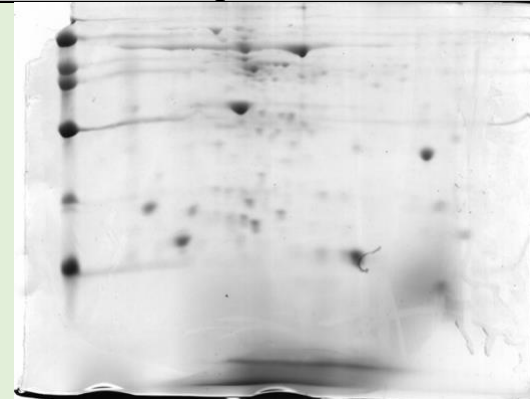

Rep 2

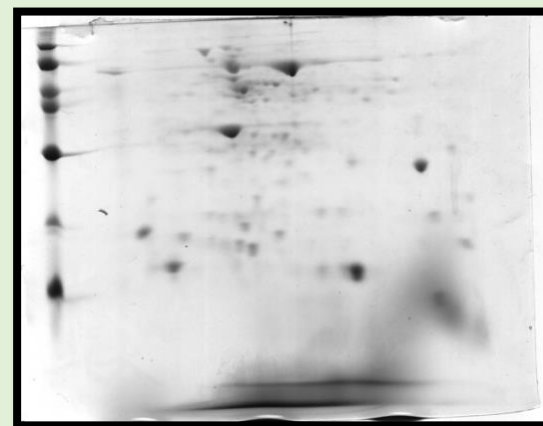

**50 DAI mock-inoculation**

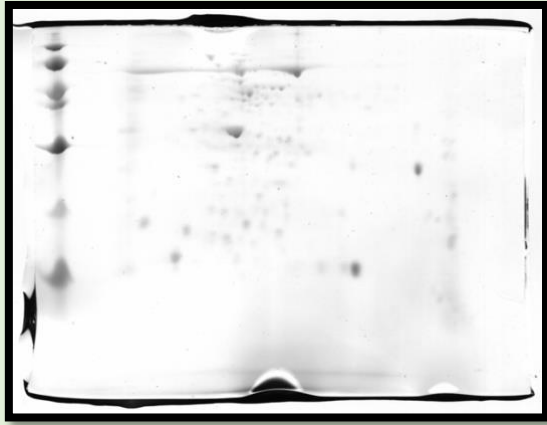

Rep 3

**50 DAI *R. microporus*-inoculation**

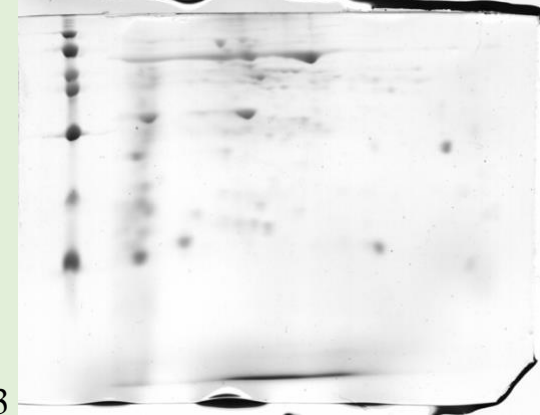

Rep 3



## Supplementary Figure 4:

### Location of the coding sequence of the uncharacterized protein LOC110748447 isoforms on whole genome shotgun contig LVXX01001672.1 (Range: 61922-78548)

*Hevea brasiliensis* cultivar reyan7-33-97 scaffold1672, whole genome shotgun sequence (matched 100% +/- )

(reversed seq)

|        |                                                                                                                                                                                                                                                                                                                                                                                                                                                                                                                                                                                                                                                                                                                                                                                                                                                                                                                                                                                                                                                                                                                                                                                                                                                                                                                                                                                                                                                                                                                                                                                                                                                                                                                                                                                                                                                                                                                                                                                                                                                                                                                                                                                                                                                                                                                                                 |        |
|--------|-------------------------------------------------------------------------------------------------------------------------------------------------------------------------------------------------------------------------------------------------------------------------------------------------------------------------------------------------------------------------------------------------------------------------------------------------------------------------------------------------------------------------------------------------------------------------------------------------------------------------------------------------------------------------------------------------------------------------------------------------------------------------------------------------------------------------------------------------------------------------------------------------------------------------------------------------------------------------------------------------------------------------------------------------------------------------------------------------------------------------------------------------------------------------------------------------------------------------------------------------------------------------------------------------------------------------------------------------------------------------------------------------------------------------------------------------------------------------------------------------------------------------------------------------------------------------------------------------------------------------------------------------------------------------------------------------------------------------------------------------------------------------------------------------------------------------------------------------------------------------------------------------------------------------------------------------------------------------------------------------------------------------------------------------------------------------------------------------------------------------------------------------------------------------------------------------------------------------------------------------------------------------------------------------------------------------------------------------|--------|
| 78,724 | GTGATTTTCATTATAAAGCATAATATTTGGAATTTTGATTAATTACACTCTATTACAAGTAAGAAATTTCCCAATTGGAATACGTTAACATCATGAATTTATTAATTTTTGGCAGGGCTTCTTGGTTCTCT                                                                                                                                                                                                                                                                                                                                                                                                                                                                                                                                                                                                                                                                                                                                                                                                                                                                                                                                                                                                                                                                                                                                                                                                                                                                                                                                                                                                                                                                                                                                                                                                                                                                                                                                                                                                                                                                                                                                                                                                                                                                                                                                                                                                             | 78,595 |
| 78,594 | CTCACCTATGGCATTATATATACTTGTGTATGTTGCCCTGGACGCATATCTATCGATCATCCAAATAATTCTCTCTTCATTGCTTTGCTTTGTTTTGTTTTCTCTGTAAGCGAAAAATGGCATTGTGCAC<br>Isoform X1 ATATCTATCGATCATCCAAATAATTCTCTCTTCATTGCTTTGCTTTGTTTTGTTTTCTCTGTAAGCGAAAAATGGCATTGTGCAC<br>Isoform X3 TCCAAATAATTCTCTCTTCATTGCTTTGCTTTGTTTTGTTTTCTCTGTAAGCGAAAAATGGCATTGTGCAC                                                                                                                                                                                                                                                                                                                                                                                                                                                                                                                                                                                                                                                                                                                                                                                                                                                                                                                                                                                                                                                                                                                                                                                                                                                                                                                                                                                                                                                                                                                                                                                                                                                                                                                                                                                                                                                                                                                                                                                                                    | 78,465 |
| 78,464 | CGCCACAGCTGGTGTTCAGTTCTGATCAAGAGTCTACCAGACACGTTCTGGACTAAAATTCAAGATTCGCGAAATCTTTTTCTGAAGCCGCACCAAACCTATATTCATCAATTGCTGTGTCAGCGGCACG<br>CGCCACAGCTGGTGTTCAGTTCTGATCAAGAGTCTACCAGACACGTTCTGGACTAAAATTCAAGATTCGCGAAATCTTTTTCTGAAGCCGCACCAAACCTATATTCATCAATTGCTGTGTCAGCGGCACG<br>CGCCACAGCTGGTGTTCAGTTCTGATCAAGAGTCTACCAGACACGTTCTGGACTAAAATTCAAGATTCGCGAAATCTTTTTCTGAAGCCGCACCAAACCTATATTCATCAATTGCTGTGTCAGCGGCACG                                                                                                                                                                                                                                                                                                                                                                                                                                                                                                                                                                                                                                                                                                                                                                                                                                                                                                                                                                                                                                                                                                                                                                                                                                                                                                                                                                                                                                                                                                                                                                                                                                                                                                                                                                                                                                                                                                                                  | 78,335 |
| 78,334 | GGGGTACGCAAAGTCGAGTATGGCCAGGTACGTAAGTCTTCCCAAGATAATCTTTAGCACTTCTTTGGTCTTTTTATATACATACTTGAAAAAATGTTAATGAGTAAATTAATAAAGAATTAATGTTA<br>GGGGTACGCAAAGTCGAGTATGGCCAG<br>GGGGTACGCAAAGTCGAGTATGGCCAG                                                                                                                                                                                                                                                                                                                                                                                                                                                                                                                                                                                                                                                                                                                                                                                                                                                                                                                                                                                                                                                                                                                                                                                                                                                                                                                                                                                                                                                                                                                                                                                                                                                                                                                                                                                                                                                                                                                                                                                                                                                                                                                                                  | 78,205 |
| 78,204 | GTGAATTTGTTTTGTATGTAGATTTCTCAGAATATCAAAAACCTCGTCTGAGCTTATCACTGAAAACAGTCGGGGAAAAATTAGCTTACACTGTAACGGATGGTGATATCCTCCAAAAATATAAAGTCAAAAC<br>ATTTCTCAGAATATCAAAAACCTCGTCTGAGCTTATCACTGAAAACAGTCGGGGAAAAATTAGCTTACACTGTAACGGATGGTGATATCCTCCAAAAATATAAAGTCAAAAC                                                                                                                                                                                                                                                                                                                                                                                                                                                                                                                                                                                                                                                                                                                                                                                                                                                                                                                                                                                                                                                                                                                                                                                                                                                                                                                                                                                                                                                                                                                                                                                                                                                                                                                                                                                                                                                                                                                                                                                                                                                                                       | 78,075 |
| 78,074 | CTTCCAGGCTGAAATAATTTACCCAAATACTGGCAAATGGGTGGAATGGATCTGGACCTATAACTATCTCCAGAGGATAAAAACAGGATTTCTTGAACCTGATGAAGAGATTGCAGTGATTACAGTGAAG<br>CTTCCAGGCTGAAATAATTTACCCAAATACTGGCAAATGGGTGGAATGGATCTGGACCTATAACTATCTCCAGAGGATAAAAACAGGATTTCTTGAACCTGATGAAGAGATTGCAGTGATTACAGTGAAG                                                                                                                                                                                                                                                                                                                                                                                                                                                                                                                                                                                                                                                                                                                                                                                                                                                                                                                                                                                                                                                                                                                                                                                                                                                                                                                                                                                                                                                                                                                                                                                                                                                                                                                                                                                                                                                                                                                                                                                                                                                                        | 77,945 |
| 77,944 | ACCCTGGCAAACCTGATAGCTATATTCAAAACAAGTTAACCTAAATTCATGGATGACCTTCAAGCACATATATATGTATAGTATGTAAATAAAAACAGAGCTTGCTCTGCACTCATCCATGCATGTCT<br>ACCCTGGCAAACCTGATAGCTATATTCAAAACAAGTTAACCTAAATTCATGGATGACCTTCAAGCACATATATATGTATAGTAT                                                                                                                                                                                                                                                                                                                                                                                                                                                                                                                                                                                                                                                                                                                                                                                                                                                                                                                                                                                                                                                                                                                                                                                                                                                                                                                                                                                                                                                                                                                                                                                                                                                                                                                                                                                                                                                                                                                                                                                                                                                                                                                        | 77,815 |
| 77,814 | GCTAGATTATTGTGTCTGTGTGTACCTAACAAATGTGTACGTGTGGTGTAGTAATAAATAAAGCAGAGTCCATGTATGCTTAATGCTCTGCACCTTTATCCTATAATTGCTGCGTTATGCTATGTAC<br>AATGTGTACGTGTGGTGTAGTAATAAATAAAGCAGAGTCCATGTATGCTTAATGCTCTGCACCTTTATCCTATAATTGCTGCGTTATGCTATGTAATTTCTCCATTAATAAATAAATCCAGCTTTAGC<br>TGGTTCATGTGGTATTGCTTCGACCTTATGTTTTCCCAATTCACGAAACCAAAGCAAGGACTTAAAGCTTGTTTGCCAATTTGCTTTGCATAAATTAATCAATAAAGGGCCAATGTTATACATTTTTTT<br>TTAATTCATAATAACTTAATTTATACTTAATTTGAATGATGCACAAAACATCAATATAGTTTAAATCAATTATATAAGGGACATTAAGAAAAAAGCTATCATCAATTCGTCAAAGCATAAATGCATGG<br>TAATAATAAAAATTTGTTAATAAGAAAATAATTAATTTGAAAAGATGATTTTGAATAATAAATAAGTACACATTAGGATAGTTTTCTAGTAATTTTTTTTCTATTAAAGATAAAGTTTATTGCCATAAAA<br>AGGCCCTGGGTCAATTCAAATAAAGATTCAGACGGGATTCAGATACATAAGGAAACTCAACCTAATCATCAGCTAGTTAAACCAACAAAAGTAAAAATACAAAACAGATCAAGCTAGCATAACGAAGGCC<br>TGTGGAAAAATGGCTCTAATAGGTTGCAAAACCCACGCTGAACCTAAATAAGGCCAGAAGCCCAAGAAAGAACCCCTGAGCACACTGGACTTGACCCAAAATAAGCAAGGATCCGAAGAAAACAAATAAAGACTC<br>CGTCATTAACCGTCAAGCTTAACCGAGCTACTTCAGGAATCTAAGAAAGCCAAATGAAGCATCTGATTCTGTTAGTAGCCAACGACCACCATAGTTGAACCTCAAAGCACCCCTGGGAGGGAAGCAAGC<br>TTCTTAGAGTCTTTAGATAAACGATGAGAGTACCATGAAACAGCACCTTGGTAAAGATGAGAAATATAGAATAGGGAAACAGATGGGCATAAGGCAAAGCTCTTTAGCTCTGTTGGCTGTTAAGGGA<br>CTAGTTAGCAAGAAGATGGCACTAATAACATCTCCAAGAGGTACCCCATAGCTAAAAGTGAACCCATCCATCCCAAGCTTCAAGGCAGCTGAGAGGCCAAAGCCGTTGCCAAGAGCATCCCTGCATAC<br>ATCTAGAAGCATAGACAAACGATAGAGACTGTCATGACCCAAATATGAGTTAGACCCGGCACTAGGACTTGGGTGAGTATAAGGCCCCAAAGCCGTTAGTAAATCAACTATTCTAGCCAGCTGT<br>AAAGCCAGCACTGTAGTCCAATTTCAAGAAAATAAACAGACAGAGTCCAGTCAATAAATTGAGCTACCCAAATGGAGAGCAATATCTCACCCGACCTGTAATCACGACACAAATCAATTTGGGGAGCTCAG<br>CTCACCCTTACAATCTACAAAACAAATATATATAATCCAAATGGGAGCTCAGCTCTCTCATCCAAATACAATCACATAAATAACTTTAAAAGACTACTTTGTCAATTTTTTTTTTTAATTTATGATATAGTT<br>TAGTTAAAAATTCAGTCTTAAACGGGTTGGACTTACCAAATCCCTACCCGATCTTATATGGATCAGACCCAGTTGCCAATTAGCCGAGCTTGCTCAGAACAAGTCAAGCCATCTTTGATCTCAAAAAG<br>ATCAGACATAACCATGTATAGATTGGAATTAATAAATAGATTAGGAGATCGATGCTACAGATCTAAGATTGGAATGACGTGGACATATTACATCTCTGTAATGTATGACCAAAGGGAGTTACATGACA<br>CAGGTACATTTTTGTTACATATGGCTAAAGGAGAGCACAGGATAGTCAATAGAAATCCCTTGAATCTCTTTGTTGCTCTTTTTGGCCTTCCCTTGAATCTCTTTGTTGCTCTTTGCTCCGTTGTTTCAT<br>TTTTATTTATTTATTTATTTTGGTTTGGCTGAGTTTGGCTCTCGGCCCTCTCCCAATACCATTCTTAATAAAAATTTGCTTGTTTATAAAAATTTAATAAAAAATTTACAGTAGAAAAGAACATAAAA | 77,715 |

TTTTAAAAATTGAGAAAAATAATATAAATTCAAACCGGAGTAGATTTGACCTAATTGATAATAAAGATAAAAGCTTAAAAAGTAAAGAAAAAGAAAAAGAAAAAGAAAAATGGAGTTAT  
TATTGATGAGAAAAATTCATTAGTAACATTTCAAAGAAAAGGGAGTAAAGAAAGGATGAGGAGGAAATTTATAAAAAAGATGATGAGTCTTAATTTATTTTGGCAGTAAAGCCCAATCTTCTTTTT  
TTTAGTTAAATTGAGGATCACAGTACGATATAAATAGCTGAACCTCCATCTAATGAAATTGAGGAGGAAAACCTGGAATGGCTTTAGAAAAATATTTCAATAAAATTTACTTATGAAAAATATTTTT  
TAAATTTAACTTTAATAAAAAATAATATATTTTCATAATTATAAAAAATTTATTTTTATAAACAAGACAAGTATTAATAACAAAAATTTACTTTTAATTTTTCATTAAATTAAGGTTTAAATTTAA  
TTTTTTAAGTAAACGTTTATATTTATAAATCTAACCAAAATATATTTATTTGTTTTATAAAGAAATTCATTAATTTTAAACCAAGTGTGAAAAAGAAAAACATATATATATATATATACAGATAATGGCG  
ATTTGTTGAGGACAGATTTATATCCATTTCCACAGTTCATTTGTGAACAGCTGGCACATTTGCCGCTCTGTGGTCAAGTGACAAGGGCACAATGAACTTACGTCATGCTCCGTTCCGCTCCCTTCT  
CCTCATGTGCTTATCGGAAAAACAAGAAAAATGCTGGCACCTTACACCGAATGGAATCCATCATCTGATTTTTAGAGAAAGTGAATTTACGACAGACTGACAAGTGCCTGTAGCACTCGTTTGGCT  
TCGATCCATTTTATAAGATTTTTGAAATCAATTTAATTTTCATATTTTGTGTTTTAGTTTTATAAAAAATTTAAAAATTAATTTTAAATTAATTTTAAATTTAATTTTAAATTTAAATTTAAATTT  
TATAAATCTTATAAAATAACATTTTTTTTTAAAAATAAAAATATCCTTATCAAAAAATCTCTTAATAATTCATCGTTTATATACACATATGTTGAAATTTACATTTTTAAACCTCAATCACTAATATGGT  
TAATAGAATTTAAATCCTCATTAAGTACTATTAATTAATTAAAAAATTTAAAGTGAATCAAGTACTATTAATATATATCATCTTAAATTTCTGTGAGAATCTGTGAGAAATATGAATTTATTTTATAT  
TTACAACATATATTGTTAGTTGGTTTATATATTTTATAACTGTTATAAATTTATCAGATATAATTTTTTTTTAAATTTTATAAAAACTTATAATTTTTTAAATTTATTTTTTAAATAGAAAAATTTGATAGT  
TTATTAATAAGAAATAAATAAGATAAGTACATCACAAATGTTCTCATAAGAGAAAAAAAATACAACATAGAAATAATTAATAATTTCTGTTCATGATGATCTGGATAGAGCAGAAATAGCCTTTTCGAGTAGTAA  
CTAATAAATTTTTTAAATTTGGACAATCAAGAAAACTCTGTAAATTTACCCTTTAAGGAATTTGTTAATCACCACATCAATGAAGGAATAGATCGTACCATTAGGCTCCATTGATAGAAAAATATTA  
CCCATACCTGAGTCTCAAAATAAAAAAATCAATAATCAATGATGATTTTTGAAATGGCAAATAGTCTATTCAAAATTTAAAAAAATAAACAAAAATCTCACTAAGGGAAAGAAAAATAAAATCCTAATAA  
TGAGAAGAAATAAGACCATAAATTGAGAAGAAAGCTTCAGATTTATCTTAAATGACACAATAATAAAATGAGAAACTTAAATATGTTCCAAACAGATGTAATAATAAGAGATTTATAAAAAATAAT  
AAAAAAAGAAAAATCGATCTATGGGTAGTCACCTATGAAAAACTCACGATAATGACCAAAAAAGAGATCTAAAAGTGAATAAAAAAAGAGAGAAAAAGAGAGGAGGAGAAGAGAGAAGGAGAAATAAA  
TAAATTTTAAATTTTGAATAGTGTGTGCAAAATAAGACAACATAGATAAATCTCCTAGAAAATAATTTTTTATTTGGACAATCAAGAAAACTTCTGTAATATTACCCTTTAAGGAATTTGTTAAATC  
ACCACCATCAATGAAGGAATAGATGGTACTATTAGGCCTCATTAATAGAAAAATATACCACATCTGAGTCTCCAACATAAAAAATCAATAATCAACGCCTGTATTTGAAATGGCAAATAGTCCATTC  
AAATATTTAAAAAGATAAACAAAAATTCCTAAGAGGAGAAAAATAAAATCCTAATAATGAGAAGAAATAAGACCCCTAATATTGAGAAGAAAGCTTCAGATTTATTTCTTAAATGACACAATAAAAAACA  
AGAACTTAAATATGTTCAACAGATATAAATAAGAGATTTTAAAAAATAAATAAAAAAGAAAAATCGATCTATGGGTAGTCACCTATGAAAAACTCACCGATAATGACCAAAAAAGAGATCT  
AAAAGTGAATAAAAAAAGAGAGAAAAAGAGAGGAGGAGAAGAGAGAAGGAGAAATAAATAAATTTTAAATTTTGAATAGTGTGTGCAAAATAAGACAACATAGATAAATCCTCAGAAAATAATGGTTGA  
ATTTGTGAAATACGTTCTTTATTTCTAGAAAATAAGGTCGAATTTGTAAGGATATTTTTATGAAAAAAACGTAATTTGTAATTTATAGATTTTCTCTCACATAAATACATTTAGTAGTAAATTTA  
TATTAATACCATTGATGGCTAATTCAGTTTTGATAAACTCGATTAATGTTTCCAATACGAGAATTTACATTTTAATAATTTTCTTCTTAGTGTGATATGTAATATTTTAAATTTAGAGAATTT  
TATTTTATTTAAATTTTTTATAAAAAATAAATAAGAAATCTCATTTAAAAAAATATAAATGTTTTAAAAAAATCACTTTGATACTAATTTTTTTAGCAAATGGATTTTGAATTTCAATCTCTTTTGC  
CATTGCTAATAATCATGGTGATGCCAACTAAGCTCCCTTAAATGGGTAGAATTAATGAAAAATAATTTTAAATTTAGGCTTTATCTCTTTTCGTAGAAAATACTTTTTTAAATATTTTATATTTTATAG  
TATTTAAGCAATAAAAAAATGATCAACAAAAATATTTTATAATTTAAAAAATTTAAGTAAATTTAAAAAAATGAGGCTCTCTTTTAAAAAAAGAAAGTCATTTCTTAAATTTTGCACATCTAATTA  
AATTAATAAAATACCTATATATGCATTATATAAATATATATTTAAATTTAATAATATAAATAAACAATAAAGAAATTTTTCAATTAATAATTTTTCTTAAAAATATTTTTCTATAAAAAATTTTTCTATA  
TAAATTTTATTTTTTATAAACAACACTCAAGATATAAAAAAGATCATACTAAATTTTTTAAATTTAATTAATTAAGTACTATTACGAAATTTGAAAATAAGTACAAAAAAATCTCTCTCTATTTCTTTCT  
CTTGAATAAACTTTTTAATCCATTTTTAATCTGGGACTGCCACTGTAAGCTCAAATAAACCCTCTATTTCTTTTTCTTTATTTGCTTTGATAAATCTTAACTGCTTTCTTATTTGCTTTCAAT  
GAACCTATAAACTTAAATACCTTGTAGTTATGCTTTAGTTGTTGTTTTGAGCTTTAGCTCCCAATTTCTACCAAAAAACTCAAAATATATATATAAATAGAGGTGCTTTCTACTAAAAATAAATAGATTT  
TGCTTTCTCTTCTATATATTCTATGAAAATTTTTTTCTCCCTCTTCTGAGTAGAATTTTCTCCTATGTTTAACTTTAAATTTCTCTGATAATTTTTTTAAATTTTCTATGAAAAGATTTTGTAAATTT  
TGAATTTAATAATTTTATATACATGAATATAAATTTTTTAAAGATTTATAAATTTGTGATGGAATAATCTACTTAAAAAGATATTGAGATATCGAAACAATCAAGAGTAGTACATAATGATCATAT  
GTAGCATTTTTGTCCATTTTGAAGGTTATATCATATAATTTTTTATATTAATGTTATTTATTTGTAATATCACATTAATTTGATTAATTTGAACGATCTGTTTTTAGTCTCTTTTTTATAAGCTTT  
GTTGAAATTTATATAAATTTAATTTTTATCGATGTTAAAAATGTTAAAAAATTTAATAATTTTGTTTAAAAAACGAAATTTAAAAAATATATATTCTATGAGAATTTGAAAAATTTAATAAATACGA  
CCCGGAAAAGCTCATTTCTAAATAAATTTCTATACTTAAATAAATAAATTTGAAAATGAATACATTTATTTTTTAAAACTTTTTAAAAATAAATAAATTCGAATAAGTTTATTAATATAAATAAAT  
AAATAAGTTTATTTATGTAATCTATCATGTAATTAATAAATTTATTTTTTAAACATAAATAGTTTTTATTAATTTTAAATTTTAAATTTTAACTCACAATCTGTAAATAATTTTAAATGTTATTTAAAT  
ATAAATTTAATAAATGGATGGTGTAAAAATATAAATAAATGTGAACTTATTTTTGAATGTTGACGTAACATTAATTTGGAAGTAAATAAGCGGCTCTCACGCTTTGTCTCACTAGCGGAAAGGAAACAA  
AAATTTTCTACAGAAATTTTTTTTTTAAATAAATAAATTTTTGTAACATTAAGCAGAGCCACATAACGATTAATGTTGATGCTTACGTCATGGCATCTCTACATAAATTCATGAAAACAGCCAAAAGA  
AAATCCTTTAAATGAAAACAATAATGATAGAATAATTTGGAGACTTAAGTAATGGATAAAGACATAAAAAATTTAACTTTTTCTTTTATATCTTTTATTTCAAATTAATAAAAAAACTTTTCAAATAA  
TTTATAAAAAAAGTTTGAGATGAACATATATAAATTTAAATTTAGTGTATATATATGCAAGACACAGCATTTTCGCAATTTTAGATAGAATAAATACGTTGGTTGCTAAAAGAGAAAATGAAAATAA  
ACATGATTAATACGTTGGCTGTATATTTGTTTACCCTCTCCCGTAAACGTAACATTTCAAAGGAATGGCACTTGAATTTTCCACTCGGCCGGTAAAAATCATATGATGGGATTTTTATAAAAAA  
ATTTAAATTTAAATAAATTTTATAAAAAAGAGAGAAATAAATCAACAAAAAGAAAATAAATGACGACCAAAAAAGAAAATATAGTTTTTTATTTGCTGTTCGATTCGAGGAGTCAATGATGATTTCTATTTTTG  
TTTATCCCTTCTTAGAAAAAGTCAACTTTTTCAAGGAATGGCACCTAAATGATTTACATTTGGGATGGATGGCAATTTGGATTCGCCAGTTGTGTTGTATCCACATAAATAAGAAATGAATCCTGAG  
AAAACTAAATACGAATATAATTTTATAAATAAATAAATGATATGATTTAATATGATTTATATAAATTTGTTGATTAATTTGACATAACATAGCTTATTTAACACTGTTAGATATAAATTAATTTATC  
TAAACGATTTGATATAAATTTAATTTAATTTTTTATAAATAATGTTGAAAATTTATAAATAAATAAATTTAATTTTTGATCGCTTAAATGTTTAAATAAATAAATTTAATTTATTTTTAAAAAATGAAAATAA  
AAATATAATTTCTATAAGAAATTTGAAAAATTTATAAATAAACCAGAAAGCTCATTTCTAAAAATATATATATATATATATATATATATATATATATATATATATATATATATATATATATATATA  
TATTATTTCAACCTGGTATTAATGAACTCCGTGTATATGCTTTCAATTTCTGTGAAAATTCGATCGTTGCCCGGATCTGTAATTTCTGGTTCGAGCAGATAAGCTGCTGGAACCATTTGCAAGCCGGATCAAG  
ATTAATAGGCTATCCACCGTTTTCAGACGTTCTAGACCGCTCCAGTTGTGATGTTAGTAACTTGAACCTGAACTTATATTTACTCAATTTTGCCTTGTACTGGGTTAGAATAAATTTATAAAAAA  
TTTATGAAATGATAAGAAAAATACGATTTCTTATGCAATGACCTTATAAATTTGTTAAGGACTGTGGGGAGTTTTATAAGAAATTTTTTAAAGTTAGTTTTGGAAAAATAATAGTTTTGAAAGT  
TTATAATGAAATTTGCTGATTTGTGATTTGCTTGGTTGGAGGGCTTAGGAGGGGTGATATAATGATGATGAGATATGGATTGAGTTAAGAAATTTAATTTGAACCATTTTGCAGGTTGGGTAGGTC  
ATAGGATAGGGGAGACTCTGTCCGATTTTCAGCACAACCTTAGGGTATCTTTGATCTTTTCTAAAAATGTTATGAGTCAAATAATTTAAATAATTTGAATGAAATTTGTCAAGTAAATGCTCAGGTTGAGCCAGCAGCTTC  
CTCCTTCTGAGCCGCGCAGTGAACCTGGTTCAAATTTGGGAGTAAATAAATTTAATTTGATTTGATTTATATATATCAAGCATGCACATGCATTAATAAATGATGATCTATGTAG  
TTAAACACTAGGCACATTTTATATTGCATTCATAATTGTTGAAAGTCCATGGATTTGTTTGTGGTAATTTGGAGCAGTGTCTGTGCGTGGCTACGTTGGTATGGTATTAGATATGGACATGATGGGT



62,604 CACGTA CTGCTCCAAGATAATCTTTAGCACTTCTTTGGTCTTTTTATATATATACTTGAAAAAATGTTAATGAGTAATTAATAAAGAATTAATGTTACTGAATTTGTTTTGTATGTAGATTCTCAGA  
ATTCTCAGA  
ATTCTCAGA 62,475

62,474 ATATCAAACCTCGTCTGAGCTTATCACTGAAAACAGCTTGGGAAAATTAGCTTACACTGTAACCTGCTGGTGATATCTCCAAAAATATGATGTCAACAACCTCCAAGCTGTAATAATTCACCCAAATAG  
ATATCAAACCTCGTCTGAGCTTATCACTGAAAACAGCTTGGGAAAATTAGCTTACACTGTAACCTGCTGGTGATATCTCCAAAAATATGATGTCAACAACCTCCAAGCTGTAATAATTCACCCAAATAG  
ATATCAAACCTCGTCTGAGCTTATCACTGAAAACAGCTTGGGAAAATTAGCTTACACTGTAACCTGCTGGTGATATCTCCAAAAATATGATGTCAACAACCTCCAAGCTGTAATAATTCACCCAAATAG 62,345

62,344 TGAGAAATGGGTGGGATGGACCTGGACTTTAACTATCTCCCGAGAATAAAGCAAGAGCTTTCAGCTTGATGCAGAGATTGCAGTGATTGCAGTGAAGACCTTGACAGAACCTGATAACTATATTCAA  
TGAGAAATGGGTGGGATGGACCTGGACTTTAACTATCTCCCGAGAATAAAGCAAGAGCTTTCAGCTTGATGCAGAGATTGCAGTGATTGCAGTGAAGACCTTGACAGAACCTGATAACTATATTCAA  
TGAGAAATGGGTGGGATGGACCTGGACTTTAACTATCTCCCGAGAATAAAGCAAGAGCTTTCAGCTTGATGCAGAGATTGCAGTGATTGCAGTGAAGACCTTGACAGAACCTGATAACTATATTCAA 62,215

62,214 AACAAAGTCAACCTAAATTCATGGATGACCTTAAAGCGCGCGCGCGCACATATATATATATATATATAGTATGTAATAAAAACAGAGCCTTGCTCTGCACTCATCCATGCATGCTGCTAGATTATTG  
AACAAAGTCAACCTAAATTCATGGATGACCTTAAAGCGCGCGCGCGCACATATATATATATATATATAGTATGTAATAAAAACAGAGCCTTGCTCTGCACTCATCCATGCATGCTGCTAGATTATTG  
AACAAAGTCAACCTAAATTCATGGATGACCTTAAAGCGCGCGCGCGCACATATATATATATATATATAGTATGTAATAAAAACAGAGCCTTGCTCTGCACTCATCCATGCATGCTGCTAGATTATTG 62,085

62,084 TGTCTGTGTGTACCTAACAAATGTGCTACGTGTGGTGTAGTAATAAATAAAGCAGAGTCCATGTATGCTTAATGCTCTGCACTTTATCCTATAATTTCTGCGTTATGCTATCTACTTTCTCCATTAA  
TGTCTGTGTGTACCTAACAAATGTGCTACGTGTGGTGTAGTAATAAATAAAGCAGAGTCCATGTATGCTTAATGCTCTGCACTTTATCCTATAATTTCTGCGTTATGCTATCTACTTTCTCCATTAA  
TGTCTGTGTGTACCTAACAAATGTGCTACGTGTGGTGTAGTAATAAATAAAGCAGAGTCCATGTATGCTTAATGCTCTGCACTTTATCCTATAATTTCTGCGTTATGCTATCTACTTTCTCCATTAA 61,955

61,954 AATAAAATCCAGCTTTAGCTGGTTCATGTGGTATTTGCTTCGACCTTATGTTTCCATTTCCAGAACCCAAAGCAAAGGACTTAAAGCTTGTTTGCCAACCTGCTTTGCATAATTAATTCATAAAGGCC  
AATAAAATCCAGCTTTAGCTGGTTCATGTGGT  
AATAAAATCCAGCTTTAGCTGGTTCATGTGGT

61,824 AATTGGTATACATTTTTTTTAAATTCATAATAACTTAATTTACTTAATTTGAATGATGCACAAAACATCAACATAGTTTAAATCAATAATAAAGGGACATTAATAAAAAAAAAAAGCTATCATCAATTCGT  
61,694 CAAAGCATAAATGCATGGTAATAATAAAAAATTGTTAATAAGAAAATAATTAATTTGAAAGAATGATTTTGAATAATAAATAAGCTACACATTAGGTTAGCTTCTAGTAATTTTTTTCTATCAAAGATA  
+ 61,564 bp in the WGS contig

## Supplementary Figure 5:

### Location of the coding sequence of the uncharacterized protein LOC110748447 isoforms on whole genome shotgun contig MKXE01009552.1 (Range: 38570-39259)

*Hevea brasiliensis* cultivar RRIM600, whole genome shotgun sequence (matched 100% +/- with isoform X1)  
The 3000 bp of 5'upstream region was the blue region

(reversed seq)

```
TTTTCTTGTCTCAACAAGCCTTTGTTGAGAAAGTGCTTAAGCGTTTTAACATGAATAATGCTAAGCCTGTGACTGTTCTGTTTGCTGCCCATTTCAAGTT 43,023
ATCTGCAGATATGTCACCAAAAATAGATGAGGAGATAGAGCAGATGTCTAGTGTCCCTATTCCAGTGCCTGTTGGTAGCATCATGTATGCTATGGTATGC
ACACGACCTGACATTTTACATACAGTTAGTGTGTGAGTAGATACATGGCGTGCCTGGAAAAAGTATTGGCAGGCAGTGAAATGGATTTTGAGGTATT
TGAAGGGTAATACAGATGTTGGTCTGACATTTGACAGGGCCAAGATGAGTGATTGAGTGTGGTCTGTTGGCTGTGTGGATTTCAGATTTTGCAGGGGACTTAAACAA
GAGGAGATCTTTGAAAGGTTATTTGTTACTCTTTATGGAAGTGCTATCAGTTGGAAGGCAACATTGCAAGCTACAGTTGTTTTGCTACACAGAGGCT
GAATATATGGCTTTAGCAGAGGCAGTAAAGGAAGCTTTATGGTAACAAGGTTTGGTGGGTGATCCTTGGGTTGATACAGAATAAGACAACGGTGTGTTGTTG
ACAGCCAGAGTACAATACATCTCATAAAGAATTAGATGTACCATGAGCGAACTAAGCAGTATGATGTCAGATATCACCTTCATTTCAGGACATTGTATCTTA
GGAGACTGTAGTTTGTGCAGAAAAGTCTCTACACATGATAATCTAGTAGATATGATGACCAAGGGAGTCCCTAGTCAGCAAGTTTAGGTATTACCTAGACTTG
GTTGGTGTGTTGAGTGTCTCAGTAATGCCCTTGCAGGGCAGATGGCAAGCAGAGTGTGTTGTTGGTATTTTGTGATGATTGAGAGAAATGCAAGCCAAG
GGAATGAATTGATATTTTTGTGGCTTGAATTTGGATATGTTTTTCATGGACTAGAATTTGACCCAACTTGAAGTTTCGCGCAGCGACCCGATTAGGA
TAAAATATTAGAGTGTGAGATGTTCCGAAAACACATTTGGGGTTAGGGTTTGAAGTTTTTGTATTTTACTCTTTTTCATCATAGTAGAACCTTT
TTCTCTTATCTTTCCAGTGGATGTAGACCTTACGGTTGAACACGTTAAATTTCTGTGTTATTTCTACTTCTCTTTTTTATACTGTGTGATTGTATGATTTGT
GTGTGTGCCCTTGAATTTGGCGTCTGGTCAAAACATTAAGTATATTTATATAGTATAAATAGAACAACATAAATTAAGTATTATAAAGTATTAATAATATAT
GTAACATAAATCATTAATAAATAAGAAATGATAGATAATATTAAGTTATATAAGCCATAATCATATAATATATATATAATATATATATATATATATAT
ATATATATATATATATATATATATATATATATAAACCATCAAAATATATAAATATATTTATAAAATGATTAACAACATATGCACGATTCATTTTTGATTG
ATATAGGCTAGCATTGATGTACCGTTTCAATTCATTTTCAGTGAAGAATTAACCTGGACAAAAAATCGGTTCAATACAATTTTTGATTTGGTTG
AAAAGTGGTGGAGCTATAAATTTCTAATGCGAGCAAAAGTTTTACTTCTGTTATATAAAATATTTAAAAAATATTTTTTACTTACAAAAATTTGACT
CATAAGCATATGAATAAATATACTTTTGAGAAAATTAATTAATGTTAAAATTTCAATTTATTAAACTCTGTCAATGTGCAAGATTTAATATATCATTCA
CTATATCCTCACAATAAATGAAAAATAAATAATATATATTTATTTTATATGTTGTCTTTAGTTTTGTTTTTAAATCAATATGTTGCTTTAGTTTTAG
TATTAACCAATCAATTAAGTAATATAGTGGAAATAAATCAACTTTTTTTCACCTTAGCTTATACATTAATAATGAACAATTTTTAAATGTAATAATCTC
ATTGGAAGATTTTCAGATTTATTTATATAAATAAATAAATAAATAAAGACTATTAATATATTTTCATATCAAAATTTAGTCTCTCATATATAAATTTT
ATATAGACTAGGAGAAAAAATAAATTCAGGCATCAAAATATATAGAATCATGATGGAACCTAATAAACAATAAATTTTCAGTGAGCCAAATGCCCTATAG
GTGAGCTGTAGCAAAAAATGAAAAAATAAAATATGAAAGTGGTCAATTTGAAATTTCTGAAATTAATAAAGTTAACTTATTATTTAAAGTATGATAT
ATTATTTAATGTTTTAATTTTAGTTGAAAAATGAAAAATTAATTAATAAATTTTTAGTTTTCAATTAATTTTACTTAAATTTTATAATTAATCAACTAA
GCTAATTTATTTGTTGTTTAAAAAGAAATTCATAAATCCATTTCAAGTTTACATTTGTGAATAGATGAAATTCGTCAATCCTAAAAATGTCGCTATTATTA
TTATTTAATTAATTTATATATTTATTTATTTATTTATTTATTTATTTATTTATTTATTTATTTATTTATTTATTTATTTATTTATTTATTTATTTATTT
CCTGTCCCATAAAAAATAAATAAACCACAAAAAGCTCTACAACAACGATAAACCAGTTTAGAGTAATAGTCCCTTTTCACACTGTATGATACAC
ATTCCGCTCAATTAACAAATGATATATTAATAAATACGATAAATTTTTTATATAGCATGTGTTTATGATTTTTTAATAATTTGGATATATAAACACATT
GGTGTAGTAAGAAATTTTCATTATATCCAAATTTTATTTCAATAGATATAGATATTTAAAAAATTAATAATGAGGTTCAACAAAAATAAACACTCTACAATA
AAAAGATACATCTTTAAAAGTAGTCAAAATAGCAATAAACCCTCTAAGGGAAACATAGCACTACATATAAATCAGAGGAAGTAATTAGAATTT
AGCTTTTCACTTAATTCATTTATTTTATATTTTATCTAATCAACAAAATTTATTTATTTTATTGCTTAAAAGGAATTCGATAATTTTAAATTTTGGCAATT
TCAGATATTGTACCTTACAAATCATTTCAGTTTCCATAGTGAACAGATGGAATCAGATCATCCTTATGATGTCACTGCGTATTTTTTCTCCTTATTCAT
TATTTCCAGAGAAATGAATGAATTAATGCAAACTAAATGAATGGCTTGAATAATGATAAATAAGATGTATATATGCACACACTAATTTTTATATCAAT
TAAATTTTATTTAATTTATTTATTTATGATAAGATTTAATTTTATATCAATTAATTTTATTTAATTTAATTTAATTTAATTTAATTTAATTTAATTTAATTT
ATAGATATCATATAATCTTTATTTGAATATGTGATCCAATAGCTCATTTTAAATGTGGAAAAATAATTTTTGAACAAAAAATAAATTTATTTATTTCA
TTGAGCAATAAATTTGACGTCAACTTGAGGCAAAAGTTAGGAGTTTCTTATAATTAATAAATTTATATATTTAATAATGATGATGAAATTTACTGGTGATTTTCAATTA
ATCTTATTTACACCAATTTGATATATCTGTTTAAATTAATAATTTATATATTTAATAATGATGATGAAATTTACTGGTGATTTTCAATTAATAAGCATAAT
ATTTGGAATTTTGATTAATTAACACTTATTAACAAGTAAGAAATTTCCAAATGGAATACGTTAACATCATGAATTTTATTAATTTTGGCAGGGCTCTTG
```

GTTCTCTCTCACCTATGGCATTATATATACTTGTGTATGTTGCCTCTGGACGCATATCTATCGATCATCCAAATAAATTCCTCTCTTCATTGCTTTGCTTT 39,223  
     **isoform X1** ATATCTATCGATCATCCAAATAAATTCCTCTCTTCATTGCTTTGCTTT  
     **isoform X3** TCCAAATAAATTCCTCTCTTCATTGCTTTGCTTT  
     **isoform X2** ATCGATCATCCAAATA-TT-TCTC-TC-TTGCTTTGC---

GTTTTGTCTCTCTGTAAGCGAAAATGGCATTGTGCACCGCCACAGCTGGTGTCAAGTTCTGATCAAGAGTCTACCAGACACGTTCTGGACTAAAATTCA 39,123  
 GTTTTGTCTCTCTGTAAGCGAAAATGGCATTGTGCACCGCCACAGCTGGTGTCAAGTTCTGATCAAGAGTCTACCAGACACGTTCTGGACTAAAATTCA  
 GTTTTGTCTCTCTGTAAGCGAAAATGGCATTGTGCACCGCCACAGCTGGTGTCAAGTTCTGATCAAGAGTCTACCAGACACGTTCTGGACTAAAATTCA  
 --TTTGTCTCTCTGAAAGCGAAAATGGCGTTGTGCACCGCCACAGCTGGTGTCAAGTTCTGATCAAGAGTCAACCAGACACGTTCTGGACTAAAATTCA

AGATTCGCGAAATTCCTTTTCCCTGAAGCCGCACCAAACTATATTCATCAATTGCTGTGACGGCCACGGGGGTACGCAAAGTCGAGTATGGCCAGGTACG 39,023  
 AGATTCGCGAAATTCCTTTTCCCTGAAGCCGCACCAAACTATATTCATCAATTGCTGTGACGGCCACGGGGGTACGCAAAGTCGAGTATGGCCAG  
 AGATTCGCGAAATTCCTTTTCCCTGAAGCCGCACCAAACTATATTCATCAATTGCTGTGACGGCCACGGGGGTACGCAAAGTCGAGTATGGCCAG  
 AGATTCGCGAAATTCGTTTCCCTCAAGCCGACCTAGCCTATATACATCAATTCTTATCAGCGCCACGGGGGTGCGCAAAGTCGAGTATGGCCAG

TACTTGTCTCAAGATAATTCCTTTAGCACTTCTTTGGTCTTTTTATATACATACCTTGAATAAATGTTAATGAGTAAATTAATAAAGAATTAATGTTAGTG 38,923

AATTTGTTTTGTATGTAGATTCTCAGAATATCAAAAACCTCGTCTGAGCTTATCACTGAAAACAGTCGGGGAAAATTAGCTTACACTGTAACGGATGGTGA 38,823  
     ATTCTCAGAATATCAAAAACCTCGTCTGAGCTTATCACTGAAAACAGTCGGGGAAAATTAGCTTACACTGTAACGGATGGTGA  
     ATTCTCAGAATATCAAAAACCTCGTCTGAGCTTATCACTGAAAACAGCTTGGGAAAATTAGCTTACACTGTAACGGATGGTGA  
     ATTCTCAGAATATCAAAAACCTCGTCTGAGCTTATCACTGAAAACAGCTTGGGAAAATTAGCTTACACTGTAACGGATGGTGA

TATCCTCCAAAAATATAAAGTCAAAAACCTTCCAGGCTGAAAATAAATTTACCCAAATACTGGCAAATGGGTGGAATGGATCTGGACCTATAACTATCTCCCA 38,723  
 TATCCTCCAAAAATATAAAGTCAAAAACCTTCCAGGCTGAAAATAAATTTACCCAAATACTGGCAAATGGGTGGAATGGATCTGGACCTATAACTATCTCCCA  
 TATCCTCCAAAAATATGATGTCAACAACCTCCAAGCTGTAATAATTCACCCAAATAGTGAGAAATGGGTGGGATGGACCTGGACTTATAACTATCTCCCA  
 TATCCTCCAAAAATATGATGTCAACAACCTCCAAGCTGTAATAATTCACCCAAATAGTGAGAAATGGGTGGGATGGACCTGGACTTATAACTATCTCCCA

GAGGATAAAACAAGGATTCTTGAACCTTGATGAAGAGATTGCAGTGATTACAGTGAAGACCTGGCAAACCTTGATAGCTATATTCAAAACAAGTTAACCT 38,623  
 GAGGATAAAACAAGGATTCTTGAACCTTGATGAAGAGATTGCAGTGATTACAGTGAAGACCTGGCAAACCTTGATAGCTATATTCAAAACAAGTTAACCT  
 GAGAATAAAGCAAGAGCTCTTCAGCTTGATGCAGAGATTGCAGTGATTGCAGTGAAGACCTTGACAGAACTTGATAACTATATTCAAAACAAGTTAACCT  
 GAGAATAAAGCAAGAGCTCTTCAGCTTGATGCAGAGATTGCAGTGATTGCAGTGAAGACCTTGACAGAACTTGATAACTATATTCAAAACAAGTTAACCT

AAATTGCATGGATGACCTTCAAGCA-----CATATATATGTATAGTAT-----GTAATAAACAAGAGCCTTGCTCTGCACTCATCCATGCATGTCTGCTAGATTATTGT 38,523  
 AAATTGCATGGATGACCTTCAAGCA-----CATATATATGTATAGTAT  
 AAATTGCATGGATGACCTTAAAGCGCGCGCGCGCACATATATATATATATATATATAGTATGTAATAAACAAGAGCCTTGCTCTGCACTCATCCATGCATGTCTGCTAGATTATTGT  
 AAATTGCATGGATGACCTTAAAGCGCGCGCGCGCACATATATATATATATATATATAGTATGTAATAAACAAGAGCCTTGCTCTGCACTCATCCATGCATGTCTGCTAGATTATTGT

GTCTGTGTGTGTACCTAACAATGTGCTACGTGTGGTGTAGTAATAAATAAAGCAGAGTCCATGTATGCTTAATGCTCTGCACTTTATCCTATAAATTTTC 38,423  
 GTCTGTGTGTGTACCTAACAATGTGCTACGTGTGGTGTAGTAATAAATAAAGCAGAGTCCATGTATGCTTAATGCTCTGCACTTTATCCTATAAATTTTC  
 GTCTGTGTGTGTACCTAACAATGTGCTACGTGTGGTGTAGTAATAAATAAAGCAGAGTCCATGTATGCTTAATGCTCTGCACTTTATCCTATAAATTTTC

TCGGTTATGCTATCTACTTTCTCCATTAATAAATAAATCCAGCTTTAGCTGGTTCATGTGGTATTTGCTTCGACCTTATGTTTCCATTTACGAAACCCAA 38,323  
 TCGGTTATGCTATCTACTTTCTCCATTAATAAATAAATCCAGCTTTAGCTGGTTCATGTGGT  
 TCGGTTATGCTATCTACTTTCTCCATTAATAAATAAATCCAGCTTTAGCTGGTTCATGTGGTA

AGCAAAGGACTTAAAGCTTGTGTTGCCAATTGCTTTGCATAAATAATTCATAAAGGCCAATTGTTATACATTTTTTTTTAATTCATAATAACTTAATTT 38,223

## Supplementary Figure 6:

### Location of predicted cis-acting elements on the promoter region of Uncharacterized protein LOC110648447

RESULTS OF SIGNAL SCAN SEARCH in NEWPLACE promoter database (<https://www.dna.affrc.go.jp/PLACE/?action=newplace>)

Using 3000 bp upstream sequence of uncharacterized protein LOC110648447 from rubber tree clone RRIM600

This result is the output of the new signal scan program which was completely rewritten from a scratch by Akio Miyao (\$Id: 649.pl,v 1.11 2016/04/20 08:43:39 miyao Exp \$).

The original program of signal scan was reported in Prestridge, D.S. (1991) SIGNAL SCAN: A computer program that scans DNA sequences for eukaryotic transcriptional elements. CABIOS 7, 203-206.

3000 base pairs

(+) = Current Strand

(-) = Opposite Strand

```
1      TTTCGCTTACAGAGAAACAAAACAAGCAAGCAATGAAGAGAGAATTA
      (+) POLLEN1LELAT52 S000245 13 AGAAA
      (+) ANAERO1CONSENSUS S000477 15 AAACAAA
      (+) ANAERO1CONSENSUS S000477 20 AAACAAA
      (+) DOFCOREZM S000265 24 AAAG
      (+) DOFCOREZM S000265 29 AAAG
      (-) EBOXBNNAPA S000144 33 CANNTG
      (-) MYCCONSENSUSAT S000407 33 CANNTG
      (+) EBOXBNNAPA S000144 33 CANNTG
      (+) MYCCONSENSUSAT S000407 33 CANNTG
      (-) NODCON2GM S000462 39 CTCTT
      (-) OSE2ROOTNODULE S000468 39 CTCTT
      (-) POLASIG3 S000088 47 AATAAT
      (+) TATABOX5 S000203 48 TTATTT

51     TTTGGATGATCGATAGATATGCGTCCAGAGGCAACATACACAAGTATATA
      (+) GATABOX S000039 62 GATA
      (+) GATABOX S000039 66 GATA
      (+) RAV1AAT S000314 82 CAACA
      (+) DPBFCOREDCDC3 S000292 88 ACACNNG
      (-) CACTFTPPCAL S000449 93 YACT
      (+) TATABOX4 S000111 97 TATATAA

101    TAATGCCATAGGTGAGAGAGAACCAAGAAGCCCTGCCAAAATTAATAAA
      (+) GTGANTG10 S000378 112 GTGA
      (+) REALPHALGLHCB21 S000362 121 AACCAA
      (-) SEF4MOTIFGM7S S000103 137 RTTTTTR
      (-) TATABOX3 S000110 142 TATTAAT
      (+) POLASIG1 S000080 145 AATAAA

151    TTCATGATGTTAACGTATTCCAATTGGGAAATTTCTTACTTGTAATAGAG
      (+) GARE2OSREP1 S000420 161 TAACGTA
```

(-) ACGTATERD1 S000415 163 ACGT  
(+) ACGTATERD1 S000415 163 ACGT  
    (+) CCAATBOX1 S000030 170 CCAAT  
    (-) EBOXBNNAPA S000144 171 CANNTG  
    (-) MYCCONSSENSUSAT S000407 171 CANNTG  
    (+) CAATBOX1 S000028 171 CAAT  
    (+) EBOXBNNAPA S000144 171 CANNTG  
    (+) MYCCONSSENSUSAT S000407 171 CANNTG  
    (-) CAATBOX1 S000028 173 CAAT  
    (-) CCAATBOX1 S000030 173 CCAAT  
    (+) GT1CONSENSUS S000198 177 GRWAAW  
        (-) POLLEN1LELAT52 S000245 182 AGAAA  
        (+) CACTFTPPCA1 S000449 187 YACT  
            (-) CACTFTPPCA1 S000449 199 YACT

201 TGTAATTAATCAAAATTCCAAATATTATGCTTTATAATGAAATCACCAGT  
    (-) ARR1AT S000454 208 NGATT  
        (-) ROOTMOTIFTAPOX1 S000098 221 ATATT  
        (+) ROOTMOTIFTAPOX1 S000098 222 ATATT  
            (-) DOFCOREZM S000265 230 AAAG  
            (-) TAAAGSTKST1 S000387 230 TAAAG  
            (-) CARGCW8GAT S000431 230 CWWWWWWWWWG  
            (+) CARGCW8GAT S000431 230 CWWWWWWWWWG  
                (-) ARR1AT S000454 241 NGATT  
                (-) GTGANTG10 S000378 243 GTGA  
                    (-) CACTFTPPCA1 S000449 248 YACT

251 AAAATTCATCATCATTTTAAATAATATATAAATTATTAATTAACAGATAT  
    (+) POLASIG3 S000088 269 AATAAT  
        (-) ROOTMOTIFTAPOX1 S000098 272 ATATT  
        (-) TATAPVTRNALEU S000340 274 TTTATATA  
        (+) TATABOX4 S000111 274 TATATAA  
            (+) TATABOX2 S000109 276 TATAAAT  
                (-) POLASIG3 S000088 281 AATAAT  
                (+) TATABOX3 S000110 283 TATTAAT  
                    (+) POLASIG2 S000081 287 AATTAAA  
                        (+) GATABOX S000039 296 GATA  
                            (-) SORLREP3AT S000488 297 TGTATATAT

301 ATACAATTTGGTGTAATAAGATTTCCCTTCTGATAATTTGAAAATTTTA  
    (+) CAATBOX1 S000028 304 CAAT  
        (-) TATABOX5 S000203 315 TTATTT  
            (+) ARR1AT S000454 320 NGATT  
            (+) EECCRCAH1 S000494 321 GANTTNC  
            (-) GT1CONSENSUS S000198 322 GRWAAW  
                (+) GATABOX S000039 333 GATA  
                (+) GT1CONSENSUS S000198 333 GRWAAW  
                (+) IBOXCORE S000199 333 GATAA  
                    (+) GT1CONSENSUS S000198 341 GRWAAW



351 AACATATATAAGTTTTTTTAATTATAAGAACTCCTAACTTTGCCTCAAG  
 (-) CARGCW8GAT S000431 353 CWWWWWWWWG  
 (+) CARGCW8GAT S000431 353 CWWWWWWWWG  
 (+) TATABOX4 S000111 355 TATATAA  
 (-) POLASIG2 S000081 367 AATTAAA  
 (+) POLLEN1LELAT52 S000245 377 AGAAA  
 (-) EECRCRAH1 S000494 378 GANTTNC  
 (+) TBOXATGAPB S000383 388 ACTTTG  
 (-) DOFCOREZM S000265 389 AAAG

401 TTGACGTCAAATTTTATGCTCAATGAATAAATATAAGTTTTTTTTTTTTTGT  
 (+) WBOXATNPR1 S000390 401 TTGAC  
 (-) HEXMOTIFTAH3H4 S000053 402 ACGTCA  
 (-) PALINDROMICCCBOXGM S000255 402 TGACGTCA  
 (+) ASF1MOTIFCAMV S000024 402 TGACG  
 (+) PALINDROMICCCBOXGM S000255 402 TGACGTCA  
 (+) TGACGTVMAMY S000377 402 TGACGT  
 (+) WRKY71OS S000447 402 TGAC  
 (-) ACGTCBOX S000131 403 GACGTC  
 (+) ACGTCBOX S000131 403 GACGTC  
 (-) TGACGTVMAMY S000377 404 TGACGT  
 (-) ACGTATERD1 S000415 404 ACGT  
 (+) HEXMOTIFTAH3H4 S000053 404 ACGTCA  
 (+) ACGTATERD1 S000415 404 ACGT  
 (-) ASF1MOTIFCAMV S000024 405 TGACG  
 (-) WBOXATNPR1 S000390 406 TTGAC  
 (-) WRKY71OS S000447 406 TGAC  
 (-) POLASIG1 S000080 412 AATAAA  
 (-) CAATBOX1 S000028 415 CAAT  
 (+) CAATBOX1 S000028 421 CAAT  
 (-) SEF1MOTIF S000006 426 ATATTTAWW  
 (+) POLASIG1 S000080 426 AATAAA  
 (-) ROOTMOTIFTAPOX1 S000098 430 ATATT  
 (+) MARTBOX S000067 438 TTWTWTTWT  
 (+) MARTBOX S000067 439 TTWTWTTWT

451 TCAAAAAAATTATTTTCCACATTAATAATGAGCTATTGGATCACATATTCAA  
 (-) POLASIG3 S000088 458 AATAAT  
 (+) TATABOX5 S000203 459 TTATTT  
 (-) GT1CONSENSUS S000198 461 GRWAAW  
 (-) GT1CONSENSUS S000198 462 GRWAAW  
 (-) CARGCW8GAT S000431 469 CWWWWWWWWG  
 (+) CARGCW8GAT S000431 469 CWWWWWWWWG  
 (-) INRNTPSADB S000395 473 YTCANTYY  
 (-) CAATBOX1 S000028 483 CAAT  
 (-) CCAATBOX1 S000030 483 CCAAT  
 (-) GTGANTG10 S000378 489 GTGA  
 (+) ROOTMOTIFTAPOX1 S000098 493 ATATT

(-) CARGCW8GAT S000431 498 CWWWWWWWWG  
(+) CARGCW8GAT S000431 498 CWWWWWWWWG  
(-) TATABOX5 S000203 500 TTATTT

501 AATAAAGATTATATGATATCTATATGTGTAGATAAAGCAAATCTTATCAT

(+) POLASIG1 S000080 501 AATAAA  
(+) TAAAGSTKST1 S000387 503 TAAAG  
(+) DOFCOREZM S000265 504 AAAG  
(+) NODCON1GM S000461 504 AAAGAT  
(+) OSE1ROOTNODULE S000467 504 AAAGAT  
(+) ARR1AT S000454 506 NGATT  
(+) GATABOX S000039 515 GATA  
(-) GATABOX S000039 517 GATA  
(-) NAPINMOTIFBN S000070 524 TACACAT  
(+) GATABOX S000039 531 GATA  
(+) GT1CONSENSUS S000198 531 GRWAAW  
(+) IBOXCORE S000199 531 GATAA  
(+) TAAAGSTKST1 S000387 533 TAAAG  
(+) DOFCOREZM S000265 534 AAAG  
(-) EECCRCAH1 S000494 537 GANTTNC  
(-) ARR1AT S000454 540 NGATT  
(-) IBOXCORENT S000424 542 GATAAGR  
(-) IBOX S000124 543 GATAAG  
(-) IBOXCORE S000199 544 GATAA  
(-) GATABOX S000039 545 GATA

551 AATAAATAATTAAATAAAATTTAATTGATATAAAAATTAATCTTATCAT

(+) POLASIG1 S000080 551 AATAAA  
(-) TATABOX5 S000203 554 TTATTT  
(+) POLASIG3 S000088 555 AATAAT  
(+) POLASIG2 S000081 558 AATTAAA  
(-) TATABOXOSPAL S000400 560 TATTTAA  
(-) TATABOX5 S000203 562 TTATTT  
(+) POLASIG1 S000080 563 AATAAA  
(-) POLASIG2 S000081 570 AATTAAA  
(-) CAATBOX1 S000028 574 CAAT  
(+) GATABOX S000039 577 GATA  
(-) SEF4MOTIFGM7S S000103 581 RTTTTTR  
(+) POLASIG2 S000081 585 AATTAAA  
(-) ARR1AT S000454 590 NGATT  
(-) IBOXCORENT S000424 592 GATAAGR  
(-) IBOX S000124 593 GATAAG  
(-) IBOXCORE S000199 594 GATAA  
(-) GATABOX S000039 595 GATA

601 AATAAATAATTAAATAAAATTTAATTGATATAAAAATTAGTGTGTCATA

(+) POLASIG1 S000080 601 AATAAA  
(-) TATABOX5 S000203 604 TTATTT  
(+) POLASIG3 S000088 605 AATAAT

(+) POLASIG2 S000081 608 AATTAAA  
 (-) TATABOXOSPAL S000400 610 TATTTAA  
 (-) TATABOX5 S000203 612 TTATTT  
 (+) POLASIG1 S000080 613 AATTAAA  
     (-) POLASIG2 S000081 620 AATTAAA  
         (-) CAATBOX1 S000028 624 CAAT  
             (+ ) GATABOX S000039 627 GATA  
                 (-) SEF4MOTIFGM7S S000103 631 RTTTTTR  
                     (-) CACTFTPPCA1 S000449 639 YACT  
                         (-) SORLREP3AT S000488 648 TGTATATAT

651 TATACATCTTATTTATCATTFTCAAGCCATTCATTTAGGTTTGCATAGTA  
     (+ ) TATABOX5 S000203 659 TTATTT  
     (-) GT1CONSENSUS S000198 662 GRWAAW  
     (-) IBOXCORE S000199 663 GATAA  
     (-) GATABOX S000039 664 GATA  
         (-) GT1CONSENSUS S000198 668 GRWAAW  
             (-) CACTFTPPCA1 S000449 697 YACT  
             (-) EECCRCAH1 S000494 698 GANTTNC

701 ATTCAATTCATTTCTGGAATATGAATAAGGAGAAAAAATACGCAGTG  
     (+ ) INRNTPSADB S000395 706 YTCANTYY  
     (-) POLLEN1LELAT52 S000245 710 AGAAA  
         (+ ) GT1CONSENSUS S000198 717 GRWAAW  
         (-) ROOTMOTIFTAPOX1 S000098 720 ATATT  
             (+ ) POLLEN1LELAT52 S000245 733 AGAAA  
             (+ ) GT1CONSENSUS S000198 734 GRWAAW  
             (+ ) GT1GMSCAM4 S000453 734 GAAAAA  
                 (-) CACTFTPPCA1 S000449 747 YACT  
                 (+ ) GTGANTG10 S000378 748 GTGA  
                 (-) BIHD1OS S000498 749 TGCA  
                 (+ ) WRKY71OS S000447 749 TGAC

751 ACATCATAAGGATGATGTGATTCCATCTGTTCACATATGGAAACTTGAAAT  
     (+ ) GTGANTG10 S000378 767 GTGA  
     (+ ) ARR1AT S000454 768 NGATT  
         (-) EBOXBNNAPA S000144 774 CANNTG  
         (-) MYCCONSENSUSAT S000407 774 CANNTG  
         (+ ) EBOXBNNAPA S000144 774 CANNTG  
         (+ ) MYCCONSENSUSAT S000407 774 CANNTG  
             (-) GTGANTG10 S000378 781 GTGA  
             (+ ) CACTFTPPCA1 S000449 782 YACT  
                 (+ ) ARR1AT S000454 800 NGATT

801 GATTGTGAAGGTACAATATCTGAAATTGCCAAAATTTAAATTTATGCAAT  
     (-) CURECORECR S000493 811 GTAC  
     (+ ) CURECORECR S000493 811 GTAC  
     (+ ) CAATBOX1 S000028 814 CAAT  
     (-) ROOTMOTIFTAPOX1 S000098 815 ATATT

(-) GATABOX S000039 817 GATA  
(-) CAATBOX1 S000028 825 CAAT  
(-) EECRCRH1 S000494 846 GANTTNC  
(+) CAATBOX1 S000028 847 CAAT

851 TCCTTTTAAGCAATAAATAAATAAATTTTGGTTAGATGATAAATATAAAA  
(+) PYRIMIDINEBOXOSRAMY1A S000259 852 CCTTTT  
(-) DOFCOREZM S000265 853 AAAG  
(+) CAATBOX1 S000028 861 CAAT  
(+) MARABOX1 S000063 862 AATAAAYAAA  
(+) POLASIG1 S000080 862 AATAAA  
(-) TATABOX5 S000203 865 TTATTT  
(+) MARABOX1 S000063 866 AATAAAYAAA  
(+) POLASIG1 S000080 866 AATAAA  
(-) TATABOX5 S000203 869 TTATTT  
(+) POLASIG1 S000080 870 AATAAA  
(-) REALPHALGLHCB21 S000362 878 AACCAA  
(-) MYBATRD22 S000175 879 CTAACCA  
(-) MYBIAT S000408 879 WAACCA  
(+) GATABOX S000039 888 GATA  
(+) GT1CONSENSUS S000198 888 GRWAAW  
(+) IBOXCORE S000199 888 GATAA  
(-) MARARS S000064 890 WTTTATRITTTW  
(-) ROOTMOTIFTAPOX1 S000098 892 ATATT  
(-) SEF4MOTIFGM7S S000103 896 RTTTTTTR  
(-) TATABOX5 S000203 899 TTATTT  
(+) POLASIG1 S000080 900 AATAAA

901 ATAAATGAATTAAGTAAAAAGCTAAAGTTCTAATTACTTCTCTGATTAT  
(-) CACTFTPPCA1 S000449 913 YACT  
(+) GTGANTG10 S000378 914 GTGA  
(+) DOFCOREZM S000265 918 AAAG  
(-) NTBBF1ARROLB S000273 923 ACTTTA  
(+) TAAAGSTKST1 S000387 923 TAAAG  
(+) DOFCOREZM S000265 924 AAAG  
(+) CACTFTPPCA1 S000449 935 YACT  
(+) ARR1AT S000454 944 NGATT  
(-) TATABOX4 S000111 947 TATATAA

951 ATATGTAGTGCTATGTTCCCTTTAGAGGAGTTTTATTGCTATTTTGACT  
(-) CACTFTPPCA1 S000449 957 YACT  
(-) DOFCOREZM S000265 971 AAAG  
(-) TAAAGSTKST1 S000387 971 TAAAG  
(-) POLASIG1 S000080 983 AATAAA  
(-) CAATBOX1 S000028 986 CAAT  
(+) WBOXPCWRKY1 S000310 994 TTTGACY  
(+) WBOXATNPR1 S000390 995 TTGAC  
(+) WBOXHVIS01 S000442 996 TGACT  
(+) WRKY710S S000447 996 TGAC

(+) WBOXNTERF3 S000457 996 TGACY  
(+) CACTFTPPCA1 S000449 1000 YACT

1001 ACTTTTAAGGATATGTATCTTTTTATTGTAGAGTGTATTTTTGTTGAAC  
(-) DOFCOREZM S000265 1002 AAAG  
(+) MYBST1 S000180 1009 GGATA  
(+) GATABOX S000039 1010 GATA  
(-) GATABOX S000039 1016 GATA  
(-) NODCON1GM S000461 1017 AAAGAT  
(-) OSE1ROOTNODULE S000467 1017 AAAGAT  
(-) DOFCOREZM S000265 1019 AAAG  
(-) CARGCW8GAT S000431 1019 CWWWWWWWG  
(+) CARGCW8GAT S000431 1019 CWWWWWWWG  
(-) POLASIG1 S000080 1022 AATAAA  
(-) CAATBOX1 S000028 1025 CAAT  
(-) CACTFTPPCA1 S000449 1032 YACT  
(-) POLASIG1 S000080 1036 AATAAA  
(+) TATABOX5 S000203 1037 TTATTT  
(-) RAVIAAT S000314 1043 CAACA

1051 CTCATTATAATTTTTAAATATCTATATCTATTTGAAATAAAATTTGGATA  
(+) SEF4MOTIFGM7S S000103 1060 RTTTTTR  
(-) SEF1MOTIF S000006 1063 ATATTTAWW  
(-) TATABOXOSPAL S000400 1064 TATTTAA  
(-) ROOTMOTIFTAPOX1 S000098 1067 ATATT  
(-) GATABOX S000039 1069 GATA  
(-) GATABOX S000039 1075 GATA  
(-) ERELEE4 S000037 1081 AWTTCAAA  
(-) TATABOX5 S000203 1085 TTATTT  
(+) POLASIG1 S000080 1086 AATAAA  
(-) TATCCAOSAMY S000403 1095 TATCCA  
(+) MYBST1 S000180 1096 GGATA  
(+) GATABOX S000039 1097 GATA

1101 TGAATGAAAATTCCTACTACACCAATGTGTTTATATATCCAATTATTTAAA  
(+) GT1CONSENSUS S000198 1106 GRWAAW  
(+) CACTFTPPCA1 S000449 1115 YACT  
(+) CCAATBOX1 S000030 1122 CCAAT  
(+) LEAFYATAG S000432 1122 CCAATGT  
(+) CAATBOX1 S000028 1123 CAAT  
(+) TATAPVTRNALEU S000340 1130 TTTATATA  
(-) TATABOX4 S000111 1131 TATATAA  
(-) GATABOX S000039 1136 GATA  
(-) MYBST1 S000180 1136 GGATA  
(+) TATCCAOSAMY S000403 1136 TATCCA  
(+) CCAATBOX1 S000030 1139 CCAAT  
(+) CAATBOX1 S000028 1140 CAAT  
(+) ATHB6COREAT S000399 1140 CAATTATTA  
(-) POLASIG3 S000088 1142 AATAAT

1151 AAATCATAAACACATGCTATATAAAAAAATTTATCGTAATTTTATTAATA  
(-) ARR1AT S000454 1152 NGATT  
(+) DPBFCOREDCDC3 S000292 1160 ACACNNG  
(-) EBOXBNNAPA S000144 1161 CANNTG  
(-) MYCCONSENSUSAT S000407 1161 CANNTG  
(-) MYCATERD1 S000413 1161 CATGTG  
(+) EBOXBNNAPA S000144 1161 CANNTG  
(+) MYCATRD22 S000174 1161 CACATG  
(+) MYCCONSENSUSAT S000407 1161 CANNTG  
(-) TATAPVTRNALEU S000340 1168 TTTATATA  
(+) TATABOX4 S000111 1168 TATATAA  
(-) GT1CONSENSUS S000198 1180 GRWAAW  
(-) IBOXCORE S000199 1181 GATAA  
(-) GATABOX S000039 1182 GATA  
(-) POLASIG1 S000080 1191 AATAAA  
(+) TATABOX3 S000110 1193 TATTAAT  
(-) TATABOX3 S000110 1194 TATTAAT  
(-) ROOTMOTIFTAPOX1 S000098 1197 ATATT

1201 TATCATTGTTAATTGAGCGAATGTGTATCATAACAGTGTGAAAGGAGGAC  
(-) GATABOX S000039 1201 GATA  
(-) EBOXBNNAPA S000144 1204 CANNTG  
(-) MYCCONSENSUSAT S000407 1204 CANNTG  
(+) EBOXBNNAPA S000144 1204 CANNTG  
(+) MYCCONSENSUSAT S000407 1204 CANNTG  
(-) AMYBOX1 S000020 1206 TAACARA  
(-) MYBGAAHV S000181 1206 TAACAAA  
(-) GAREAT S000439 1206 TAACAAR  
(-) CAATBOX1 S000028 1213 CAAT  
(-) NAPINMOTIFBN S000070 1222 TACACAT  
(-) GATABOX S000039 1227 GATA  
(-) CACTFTPPCA1 S000449 1235 YACT  
(+) GTGANTG10 S000378 1238 GTGA  
(+) DOFCOREZM S000265 1241 AAAG

1251 TAATTACTCTAAACGTGGTTATCGTTGTTGTAGAGCTTTTTGTTGGGTTA  
(+) CACTFTPPCA1 S000449 1255 YACT  
(+) T/GBOXATPIN2 S000458 1262 AACGTG  
(+) ABRERATCAL S000507 1262 MACGYGB  
(-) ACGTATERD1 S000415 1263 ACGT  
(+) ABRELATERD1 S000414 1263 ACGTG  
(+) ACGTATERD1 S000415 1263 ACGT  
(-) MYB1AT S000408 1266 WAACCA  
(-) IBOXCORE S000199 1269 GATAA  
(-) GATABOX S000039 1270 GATA  
(-) RAV1AAT S000314 1276 CAACA  
(-) DOFCOREZM S000265 1286 AAAG  
(-) RAV1AAT S000314 1291 CAACA



(+) EECCRCAH1 S000494 1452 GANTTNC  
 (-) GTGANTG10 S000378 1465 GTGA  
 (+) CAATBOX1 S000028 1468 CAAT  
 (+) ARR1AT S000454 1485 NGATT  
 (-) EECCRCAH1 S000494 1493 GANTTNC  
 (+) CAATBOX1 S000028 1494 CAAT  
 (-) DOFCOREZM S000265 1499 AAAG

1501 TTTTAAACAACAATAAATTAGCTTAGTTGATAATTATAAAATTAAGTAA  
 (+) RAV1AAT S000314 1508 CAACA  
 (-) TATABOX5 S000203 1512 TTATTT  
 (+) POLASIG1 S000080 1513 AATAAA  
 (+) GATABOX S000039 1530 GATA  
 (+) GT1CONSENSUS S000198 1530 GRWAAW  
 (+) IBOXCORE S000199 1530 GATAA  
 (-) CACTFTPPCA1 S000449 1546 YACT  
 (-) TATABOX5 S000203 1549 TTATTT  
 (+) POLASIG1 S000080 1550 AATAAA

1551 ATAAATTAATTGAAAACATAAAATTTATAATTAATTTTCATATTTTCAA  
 (-) CAATBOX1 S000028 1559 CAAT  
 (+) CEREBLUBOX2PSLEGA S000033 1561 TGAAAAC  
 (-) SEF4MOTIFGM7S S000103 1568 RTTTTTR  
 (-) TATABOX2 S000109 1573 TATAAAT  
 (+) POLASIG2 S000081 1579 AATTAATA  
 (-) GT1CONSENSUS S000198 1585 GRWAAW  
 (+) ROOTMOTIFTAPOX1 S000098 1591 ATATT  
 (-) GT1CONSENSUS S000198 1593 GRWAAW

1601 CTAAAATTAACATTAATAATATATCATCACTTTAAATAATAAGTTAA  
 (+) POLASIG2 S000081 1605 AATTAATA  
 (-) TATABOXOSPAL S000400 1615 TATTTAA  
 (-) TATABOX5 S000203 1617 TTATTT  
 (+) POLASIG3 S000088 1618 AATAAT  
 (-) ROOTMOTIFTAPOX1 S000098 1621 ATATT  
 (-) GATABOX S000039 1625 GATA  
 (+) ANAERO3CONSENSUS S000479 1627 TCATCAC  
 (-) GTGANTG10 S000378 1630 GTGA  
 (+) CACTFTPPCA1 S000449 1631 YACT  
 (+) NTBBFLARROLB S000273 1632 ACTTTA  
 (-) DOFCOREZM S000265 1633 AAAG  
 (-) TAAAGSTKST1 S000387 1633 TAAAG  
 (-) TATABOXOSPAL S000400 1635 TATTTAA  
 (-) TATABOX5 S000203 1637 TTATTT  
 (+) POLASIG3 S000088 1638 AATAAT

1651 CTTATTAATATTCAGAAATTCAAATATGACCACTTTCATATTTTAATTTT  
 (+) TATABOX3 S000110 1653 TATTAAT  
 (-) TATABOX3 S000110 1654 TATTAAT



(-) ROOTMOTIFTAPOX1 S000098 1657 ATATT  
(+) ROOTMOTIFTAPOX1 S000098 1658 ATATT  
  (+) POLLEN1LELAT52 S000245 1664 AGAAA  
  (-) EECRCRH1 S000494 1665 GANTTNC  
  (+) ERELEE4 S000037 1667 AWTTCAA  
    (-) ROOTMOTIFTAPOX1 S000098 1673 ATATT  
    (+) WRKY71OS S000447 1677 TGAC  
    (+) WBOXNTERF3 S000457 1677 TGACY  
      (+) CACTFTPPCA1 S000449 1681 YACT  
      (-) DOFCOREZM S000265 1683 AAAG  
        (-) LECPLEACS2 S000465 1688 TAAAATAT  
        (+) ROOTMOTIFTAPOX1 S000098 1688 ATATT  
          (-) POLASIG2 S000081 1692 AATTAAA  
            (-) GT1CONSENSUS S000198 1699 GRWAAW  
            (-) GT1GMSCAM4 S000453 1699 GAAAAA

1701 TTTCATTTTTTGCTACAGCTCACCTATAGGGCATTGGCTCACTGAAATTT  
  (+) INRNTPSADB S000395 1702 YTCANTYY  
    (-) GTGANTG10 S000378 1720 GTGA  
      (-) CAATBOX1 S000028 1733 CAAT  
      (-) CCAATBOX1 S000030 1733 CCAAT  
        (-) GTGANTG10 S000378 1739 GTGA  
        (+) CACTFTPPCA1 S000449 1740 YACT

1751 TTTGTTTTATTAGTTTCCATCATGATTCTATATATTTTGATGCCTGAATT  
  (-) ANAERO1CONSENSUS S000477 1751 AAACAAA  
  (-) POLASIG1 S000080 1756 AATAAA  
  (+) CPBCSPOR S000491 1758 TATTAG  
    (+) ARR1AT S000454 1773 NGATT  
    (-) BOXIINTPATPB S000296 1776 ATAGAA  
      (+) ROOTMOTIFTAPOX1 S000098 1782 ATATT  
        (+) MARTBOX S000067 1799 TTWTWTWTT  
        (+) MARTBOX S000067 1800 TTWTWTWTT

1801 TTTTTTTTTCTCCTAGTCTATATAAAATTTATATATGAGAGAACTAAAAT  
  (-) GT1CONSENSUS S000198 1805 GRWAAW  
  (-) GT1GMSCAM4 S000453 1805 GAAAAA  
  (-) POLLEN1LELAT52 S000245 1807 AGAAA  
    (-) TATAPVTRNALEU S000340 1819 TTTATATA  
    (+) TATABOX4 S000111 1819 TATATAA  
      (-) TATABOX2 S000109 1827 TATAAAT  
      (+) TATAPVTRNALEU S000340 1828 TTTATATA  
      (-) TATABOX4 S000111 1829 TATATAA  
        (-) CARGCW8GAT S000431 1844 CWWWWWWWWWG  
        (+) CARGCW8GAT S000431 1844 CWWWWWWWWWG

1851 TTGATATGAAATATATTAATAGTCTTATAATTATTTAATTATTTATAATA  
  (+) GATABOX S000039 1853 GATA  
    (-) ROOTMOTIFTAPOX1 S000098 1860 ATATT

(+) ROOTMOTIFTAPOX1 S000098 1863 ATATT  
(+) TATABOX3 S000110 1864 TATTAAT  
(-) TATABOX3 S000110 1865 TATTAAT  
    (-) POLASIG3 S000088 1880 AATAAT  
    (+) TATABOX5 S000203 1881 TTATTT  
    (+) TATABOXOSPAL S000400 1882 TATTTAA  
    (-) POLASIG2 S000081 1884 AATTAAA  
    (-) POLASIG3 S000088 1888 AATAAT  
    (+) TATABOX5 S000203 1889 TTATTT  
    (-) TATABOX2 S000109 1891 TATAAAT  
    (-) MARTBOX S000067 1897 TTWTWTTWTT  
    (+) POLASIG1 S000080 1897 AATAAA

1901 AAATAATCTGAAAATCTTCCAATGAGATTATTACATTTAAAAATTGTTCA

(-) TATABOX5 S000203 1901 TTATTT  
(+) POLASIG3 S000088 1902 AATAAT  
(-) ARR1AT S000454 1905 NGATT  
    (-) EECCRCAH1 S000494 1910 GANTTNC  
    (+) GT1CONSENSUS S000198 1910 GRWAAW  
    (-) ARR1AT S000454 1913 NGATT  
        (+) CCAATBOX1 S000030 1919 CCAAT  
        (+) CAATBOX1 S000028 1920 CAAT  
        (+) ARR1AT S000454 1925 NGATT  
    (-) POLASIG3 S000088 1927 AATAAT  
        (-) L1BOXATPDF1 S000386 1932 TAAATGYA  
            (-) SEF4MOTIFGM7S S000103 1938 RTTTTTR  
                (-) CAATBOX1 S000028 1943 CAAT  
                    (+) CAATBOX1 S000028 1949 CAAT

1951 ATTATAATGTATAAGCTAAAGTGAAAAAAGTTGATATTTATTCCACTAT

(-) NTBBF1ARROLB S000273 1967 ACTTTA  
(+) TAAAGSTKST1 S000387 1967 TAAAG  
(-) INRNTPSADB S000395 1968 YTCANTYY  
(+) DOFCOREZM S000265 1968 AAAG  
(-) CACTFTPPCA1 S000449 1970 YACT  
(+) GTGANTG10 S000378 1971 GTGA  
    (+) GT1CONSENSUS S000198 1973 GRWAAW  
    (+) GT1GMSCAM4 S000453 1973 GAAAAA  
        (+) DOFCOREZM S000265 1978 AAAG  
            (+) GATABOX S000039 1984 GATA  
            (+) SEF1MOTIF S000006 1985 ATATTTAWW  
            (+) ROOTMOTIFTAPOX1 S000098 1985 ATATT  
                (-) POLASIG1 S000080 1988 AATAAA  
                    (+) CACTFTPPCA1 S000449 1995 YACT  
                        (+) ROOTMOTIFTAPOX1 S000098 1999 ATATT

2001 ATTACTTTAATTGATTGGTAATACTAAACTAAAGACAACATATTGATTAA

(+) CACTFTPPCA1 S000449 2003 YACT  
(+) NTBBF1ARROLB S000273 2004 ACTTTA

(-) DOFCOREZM S000265 2005 AAAG  
(-) TAAAGSTKST1 S000387 2005 TAAAG  
(-) POLASIG2 S000081 2006 AATTAAA  
  (-) CAATBOX1 S000028 2010 CAAT  
  (+ ) ARR1AT S000454 2012 NGATT  
  (-) CAATBOX1 S000028 2014 CAAT  
  (-) CCAATBOX1 S000030 2014 CCAAT  
  (+ ) GT1CONSENSUS S000198 2017 GRWAAW  
    (+ ) CACTFTPPCA1 S000449 2022 YACT  
      (+ ) TAAAGSTKST1 S000387 2030 TAAAG  
      (+ ) DOFCOREZM S000265 2031 AAAG  
        (+ ) RAV1AAT S000314 2036 CAACA  
          (+ ) ROOTMOTIFTAPOX1 S000098 2040 ATATT  
          (-) CAATBOX1 S000028 2042 CAAT  
          (+ ) ARR1AT S000454 2044 NGATT

2051 AAAAAAAAACCTAAAGACAACATATAAAAATAAATATATAATTATTTATTT  
  (+ ) ANAERO1CONSENSUS S000477 2053 AAACAAA  
  (+ ) TAAAGSTKST1 S000387 2062 TAAAG  
  (+ ) DOFCOREZM S000265 2063 AAAG  
    (+ ) RAV1AAT S000314 2068 CAACA  
      (-) TATABOX5 S000203 2077 TTATTT  
      (-) SEFLMOTIF S000006 2078 ATATTTAWW  
      (+ ) POLASIG1 S000080 2078 AATAAA  
      (-) ROOTMOTIFTAPOX1 S000098 2082 ATATT  
      (+ ) TATABOX4 S000111 2084 TATATAA  
      (-) POLASIG3 S000088 2090 AATAAT  
      (+ ) TATABOX5 S000203 2091 TTATTT  
      (-) POLASIG1 S000080 2094 AATAAA  
      (+ ) TATABOX5 S000203 2095 TTATTT  
      (-) -300ELEMENT S000122 2097 TGHAAARK  
      (-) GT1CONSENSUS S000198 2098 GRWAAW  
      (-) GT1GMSCAM4 S000453 2098 GAAAAA

2101 TTCAATTTTTGTGAGGATATAGTGAATGATATAATTAATCTTGACAT  
  (+ ) INRNTPSADB S000395 2101 YTCANTYY  
  (-) CARGCW8GAT S000431 2103 CWWWWWWWWG  
  (+ ) CAATBOX1 S000028 2103 CAAT  
  (+ ) CARGCW8GAT S000431 2103 CWWWWWWWWG  
    (+ ) GTGANTG10 S000378 2112 GTGA  
    (+ ) MYBST1 S000180 2116 GGATA  
    (+ ) GATABOX S000039 2117 GATA  
      (-) CACTFTPPCA1 S000449 2122 YACT  
      (+ ) GTGANTG10 S000378 2123 GTGA  
        (+ ) GATABOX S000039 2129 GATA  
          (+ ) POLASIG2 S000081 2134 AATTAAA  
          (-) ARR1AT S000454 2139 NGATT  
          (-) CAATBOX1 S000028 2149 CAAT  
          (+ ) WBOXATNPR1 S000390 2150 TTGAC

2151 TGACAGAGTTTTTAATAAAATTGAAATTTTAACATAATTAATTTTCTCAAAA  
 (-) BIHD10S S000498 2151 TGCA  
 (+) WRKY710S S000447 2151 TGAC  
     (+) POLASIG1 S000080 2163 AATAAA  
     (-) INRNTPSADB S000395 2166 YTCANTYY  
     (-) CAATBOX1 S000028 2168 CAAT  
         (-) GT1CONSENSUS S000198 2189 GRWAAW  
         (-) POLLEN1LELAT52 S000245 2191 AGAAA  
             (+) DOFCOREZM S000265 2198 AAAG  
             (-) CACTFTPPCA1 S000449 2200 YACT

2201 GTATATTTATTCATATGCTTATGAGTCAATATTTTGTAAAGTAAAAAATA  
 (+) SEF1MOTIF S000006 2203 ATATTTAWW  
 (+) ROOTMOTIFTAPOX1 S000098 2203 ATATT  
 (-) POLASIG1 S000080 2206 AATAAA  
     (-) EBOXBNNAPA S000144 2212 CANNTG  
     (-) CATATGGMSAUR S000370 2212 CATATG  
     (-) MYCCONSUSAT S000407 2212 CANNTG  
     (+) EBOXBNNAPA S000144 2212 CANNTG  
     (+) CATATGGMSAUR S000370 2212 CATATG  
     (+) MYCCONSUSAT S000407 2212 CANNTG  
         (-) PREATPRODH S000450 2221 ACTCAT  
         (+) GCN4OSGLUB1 S000277 2222 TGAGTCA  
             (-) WBOXHVIS01 S000442 2224 TGACT  
             (-) WBOXNTERF3 S000457 2224 TGACY  
             (-) WBOXATNPR1 S000390 2225 TTGAC  
             (-) WRKY710S S000447 2225 TGAC  
                 (-) CARGCW8GAT S000431 2227 CWWWWWWWWG  
                 (+ CAATBOX1 S000028 2227 CAAT  
                 (+ CARGCW8GAT S000431 2227 CWWWWWWWWG  
                 (-) ROOTMOTIFTAPOX1 S000098 2228 ATATT  
                 (+) ROOTMOTIFTAPOX1 S000098 2229 ATATT  
                     (-) CACTFTPPCA1 S000449 2239 YACT  
                     (-) ROOTMOTIFTAPOX1 S000098 2247 ATATT  
                     (+) ROOTMOTIFTAPOX1 S000098 2248 ATATT

2251 TTTTTTTTAAATATTTTATAATAACAAGAAGTAAAACCTTTTGCTCGCATTAA  
 (-) SEF1MOTIF S000006 2256 ATATTTAWW  
 (-) TATABOXOSPAL S000400 2257 TATTTAA  
 (-) ROOTMOTIFTAPOX1 S000098 2260 ATATT  
 (-) LECPLEACS2 S000465 2261 TAAAATAT  
 (+) ROOTMOTIFTAPOX1 S000098 2261 ATATT  
     (-) CACTFTPPCA1 S000449 2279 YACT  
         (-) DOFCOREZM S000265 2286 AAAG  
             (+ POLLEN1LELAT52 S000245 2300 AGAAA

2301 GAAATTATAGCTCCACCACTTTTCAAACCAATCAAAAAATTGTATTGAA  
 (+) CACTFTPPCA1 S000449 2317 YACT

(-) -300ELEMENT S000122 2318 TGHAARK  
(-) DOFCOREZM S000265 2319 AAAG  
(+) MYB1AT S000408 2325 WAACCA  
(+) REALPHALGLHCB21 S000362 2326 AACCA  
(-) ARR1AT S000454 2331 NGATT  
(-) CARGCW8GAT S000431 2334 CWWWWWWWWG  
(+) CARGCW8GAT S000431 2334 CWWWWWWWWG  
(-) CAATBOX1 S000028 2340 CAAT  
(-) CAATBOX1 S000028 2345 CAAT

2351 CCGATTTTTTTTTGTCCAGTTTAATTCTTCACTGAAATTGAATTGAAACG  
(+) ARR1AT S000454 2352 NGATT  
(-) POLASIG2 S000081 2370 AATTAAA  
(-) GTGANTG10 S000378 2379 GTGA  
(+) CACTFTPPCA1 S000449 2380 YACT  
(-) INRNTPSADB S000395 2385 YTCANTYY  
(-) CAATBOX1 S000028 2387 CAAT  
(-) INRNTPSADB S000395 2390 YTCANTYY  
(-) CAATBOX1 S000028 2392 CAAT  
(+) MYBCOREATCYCB1 S000502 2397 AACGG

2401 GTACATCAATGCTAGACCTATATCAAATCAAAAATGAATCGTGCATATGT  
(-) CURECORECR S000493 2401 GTAC  
(+) CURECORECR S000493 2401 GTAC  
(+) CAATBOX1 S000028 2407 CAAT  
(-) GATABOX S000039 2421 GATA  
(-) ARR1AT S000454 2426 NGATT  
(-) SEF4MOTIFGM7S S000103 2429 RTTTTTTR  
(-) INRNTPSADB S000395 2431 YTCANTYY  
(-) ARR1AT S000454 2437 NGATT  
(-) RHERPATEXPA7 S000512 2439 KCACGW  
(-) EBOXBNNAPA S000144 2444 CANNTG  
(-) CATATGGMSAUR S000370 2444 CATATG  
(-) MYCCONSENSUSAT S000407 2444 CANNTG  
(+) EBOXBNNAPA S000144 2444 CANNTG  
(+) CATATGGMSAUR S000370 2444 CATATG  
(+) MYCCONSENSUSAT S000407 2444 CANNTG  
(-) RAVIAAT S000314 2448 CAACA

2451 TGTTTTAATCATTTTATAAATATATTATATATTTTTGATGGTTATATATAT  
(-) ARR1AT S000454 2457 NGATT  
(-) SEF1MOTIF S000006 2465 ATATTTAWW  
(+) TATABOX2 S000109 2465 TATAAAT  
(-) ROOTMOTIFTAPOX1 S000098 2469 ATATT  
(+) ROOTMOTIFTAPOX1 S000098 2472 ATATT  
(-) TATABOX4 S000111 2475 TATATAA  
(+) ROOTMOTIFTAPOX1 S000098 2479 ATATT  
(-) MYB1AT S000408 2488 WAACCA  
(-) TATABOX4 S000111 2491 TATATAA



(+) CAATBOX1 S000028 2734 CAAT  
(-) ARR1AT S000454 2735 NGATT  
(-) GTGANTG10 S000378 2737 GTGA  
(-) CACTFTPPCA1 S000449 2743 YACT  
(+) DOFCOREZM S000265 2750 AAAG

2751 AAGAGAAGTAGAATAACACAGAATTTAACGTGGTTCAACCGTAAGGTCTA  
(-) NODCON2GM S000462 2751 CTCTT  
(-) OSE2ROOTNODULE S000468 2751 CTCTT  
(-) CACTFTPPCA1 S000449 2757 YACT  
(-) -10PEHVPSBD S000392 2760 TATTCT  
(+) T/GBOXATPIN2 S000458 2777 AACGTG  
(+) ABRERATCAL S000507 2777 MACGYGB  
(-) ACGTATERD1 S000415 2778 ACGT  
(+) ABRELATERD1 S000414 2778 ACGTG  
(+) ACGTATERD1 S000415 2778 ACGT  
(-) MYBCORE S000176 2786 CNGTTR

2801 CATCCACTGGAAAGATAAGAGAAAAAGTTCTACTATGATGAAAAGAGTAA  
(+) CACTFTPPCA1 S000449 2805 YACT  
(+) DOFCOREZM S000265 2811 AAAG  
(+) NODCON1GM S000461 2811 AAAGAT  
(+) OSE1ROOTNODULE S000467 2811 AAAGAT  
(+) GATABOX S000039 2814 GATA  
(+) IBOX S000124 2814 GATAAG  
(+) IBOXCORE S000199 2814 GATAA  
(+) IBOXCORENT S000424 2814 GATAAGR  
(-) NODCON2GM S000462 2817 CTCTT  
(-) OSE2ROOTNODULE S000468 2817 CTCTT  
(+) POLLEN1LELAT52 S000245 2820 AGAAA  
(+) GT1CONSENSUS S000198 2821 GRWAAW  
(+) GT1GMSCAM4 S000453 2821 GAAAAA  
(+) DOFCOREZM S000265 2824 AAAG  
(+) CACTFTPPCA1 S000449 2831 YACT  
(+) DOFCOREZM S000265 2842 AAAG  
(-) NODCON2GM S000462 2843 CTCTT  
(-) OSE2ROOTNODULE S000468 2843 CTCTT  
(-) CACTFTPPCA1 S000449 2846 YACT

2851 GATACAATAACTAAAACTTTCAAACCCTAACCCCAATGTGTTTTCCGAA  
(+) GATABOX S000039 2851 GATA  
(+) CAATBOX1 S000028 2855 CAAT  
(-) SEF4MOTIFGM7S S000103 2862 RTTTTTR  
(-) DOFCOREZM S000265 2868 AAAG  
(+) TELOBOXATEEF1A1 S000308 2873 AAACCCTAA  
(+) UP2ATMSD S000472 2873 AAACCCTA  
(+) CCAATBOX1 S000030 2884 CCAAT  
(+) LEAFYATAG S000432 2884 CCAATGT  
(+) CAATBOX1 S000028 2885 CAAT

(-) GT1CONSENSUS S000198 2892 GRWAAW

2901 CATCTCACAACTCTAATATTTTATCCTAATCGGGTCGCTGCGCGAAACTT

(-) GTGANTG10 S000378 2905 GTGA

(+) CAREOSREP1 S000421 2908 CAACTC

(-) CPBCSPOR S000491 2913 TATTAG

(-) ROOTMOTIFTAPOX1 S000098 2915 ATATT

(-) LECPLEACS2 S000465 2916 TAAAATAT

(+) ROOTMOTIFTAPOX1 S000098 2916 ATATT

(-) GT1CONSENSUS S000198 2920 GRWAAW

(-) IBOXCORE S000199 2921 GATAA

(+) SREATMSD S000470 2921 TTATCC

(-) GATABOX S000039 2922 GATA

(-) MYBST1 S000180 2922 GGATA

(-) ARRIAT S000454 2928 NGATT

(-) E2FCONSENSUS S000476 2940 WTTSSCSS

(-) HSELIKENTACIDICPR1 S000056 2941 CNNGAANNNTTCNNG

(+) HSELIKENTACIDICPR1 S000056 2941 CNNGAANNNTTCNNG

(-) DOFCOREZM S000265 2948 AAAG

2951 TCAAGTTGGGTCACAATTCTAGTCCATGAAAAACATATCCAAAATTCAAG

(-) WBOXNTERF3 S000457 2959 TGACY

(-) WRKY71OS S000447 2960 TGAC

(-) GTGANTG10 S000378 2961 GTGA

(+) CAATBOX1 S000028 2964 CAAT

(+) GT1CONSENSUS S000198 2978 GRWAAW

(+) GT1GMSCAM4 S000453 2978 GAAAAA

(-) GATABOX S000039 2986 GATA

(-) MYBST1 S000180 2986 GGATA

(+) TATCCAOSAMY S000403 2986 TATCCA

(+) SORLIPIAT S000482 3000 GCCAC



# Supplementary Figure 7:

## The secondary structure prediction of Uncharacterized protein LOC110648447 isoforms using PSIPRED server

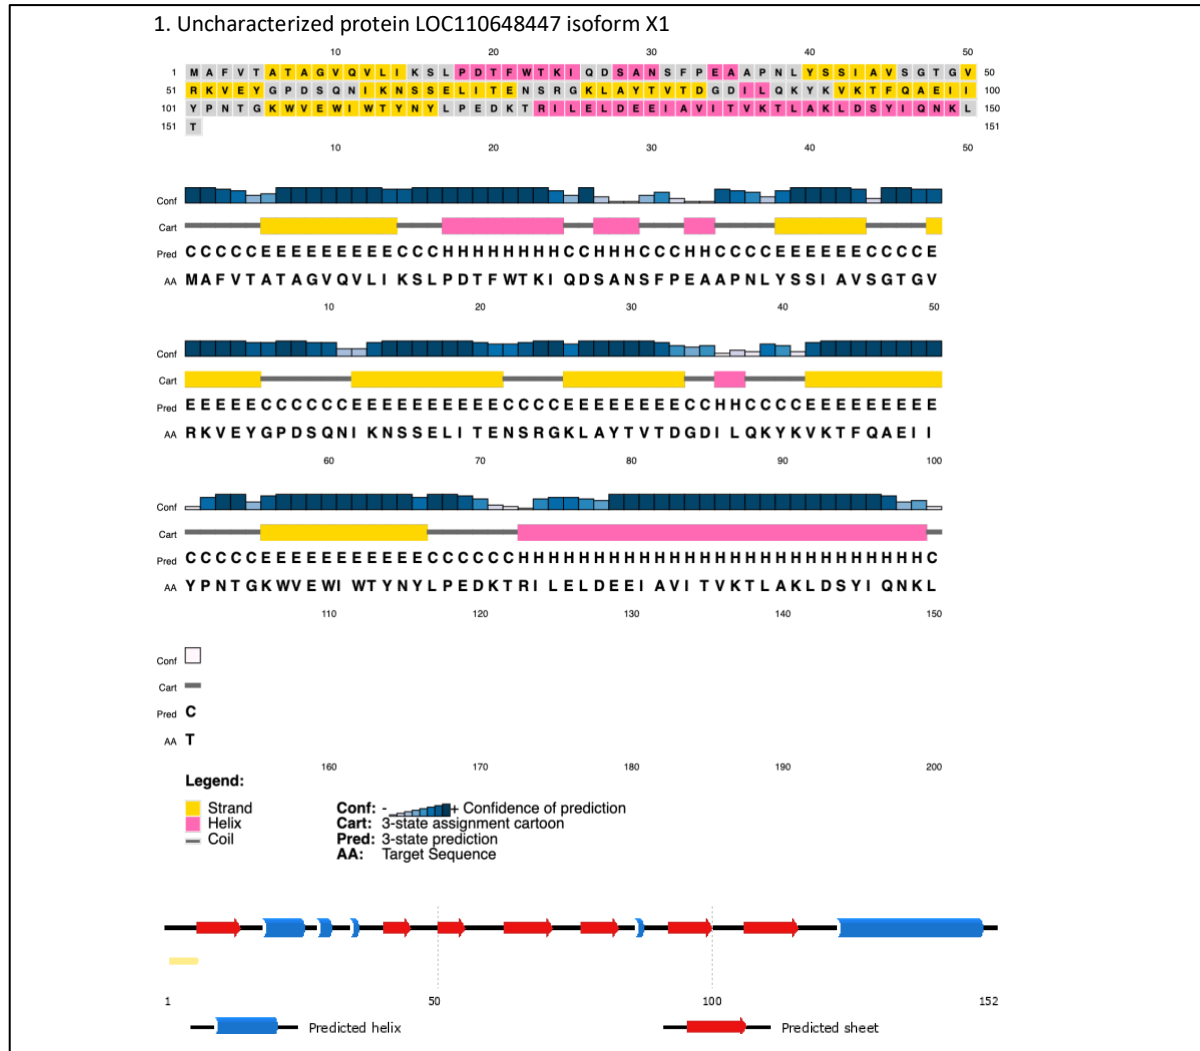

## 2. Uncharacterized protein LOC110648447 isoform X2

1 M A F V T A T A G V Q V L I K S Q P D T F W T K I Q D S A N S F P Q A A P S L Y T S I L I S G T G V 50  
 51 R K V E Y G P D S Q N I K T S S E L I T E N S L G K L A Y T V T A G D I L Q K Y D V N N F Q A V I I 100  
 101 H P N S E K W V G W T W T Y N Y L P E N K A R A L Q L D A E I A V I A V K T L T E L D N Y I Q N K S 150  
 151 T

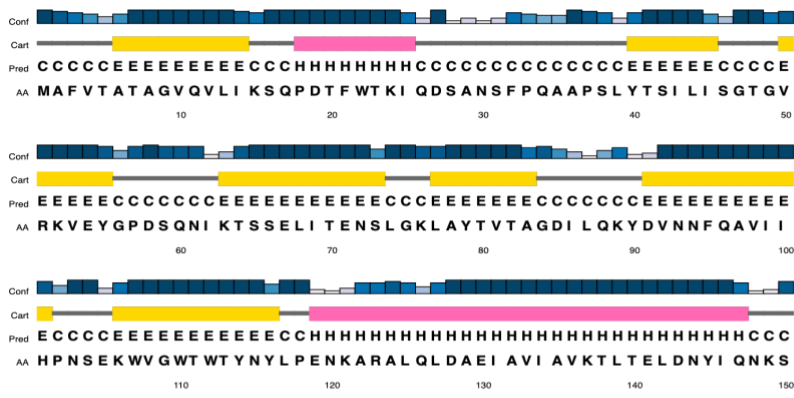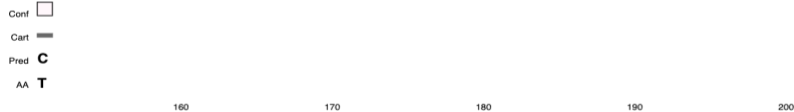

**Legend:**  
 Strand (Yellow bar)  
 Helix (Pink bar)  
 Coil (Grey bar)  
 Conf: - Confidence of prediction  
 Cart: 3-state assignment cartoon  
 Pred: 3-state prediction  
 AA: Target Sequence

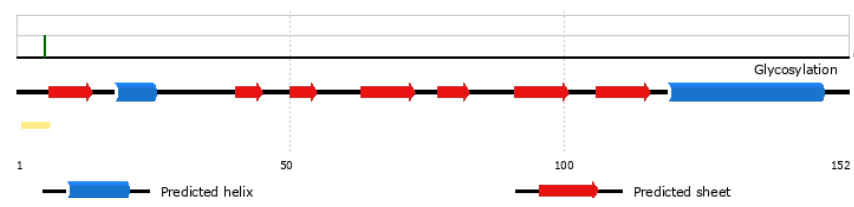

## 3. Uncharacterized protein LOC110648447 isoform X3

1 M A F V T A T A G V Q V L I K S L P D T F W T K I Q D S A N S F P E A A P N L Y S S I A V S G T G V 50  
 51 R K V E Y G P D S Q N I K T S S E L I T E N S L G K L A Y T V T A G D I L Q K Y D V N N F Q A V I I 100  
 101 H P N S E K W V G W T W T Y N Y L P E N K A R A L Q L D A E I A V I A V K T L T E L D N Y I Q N K S 150  
 151 T

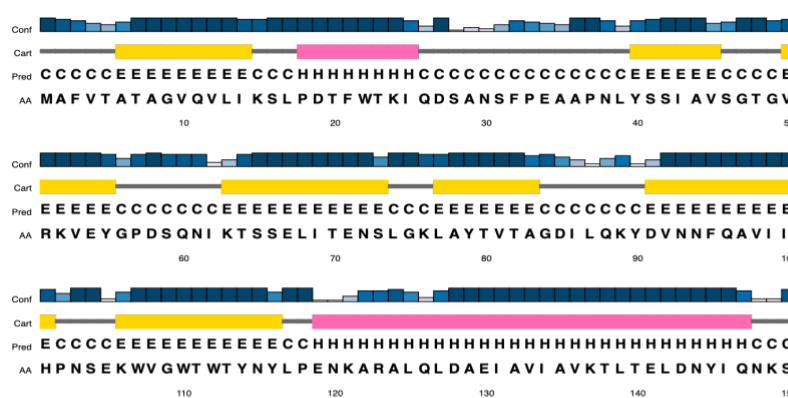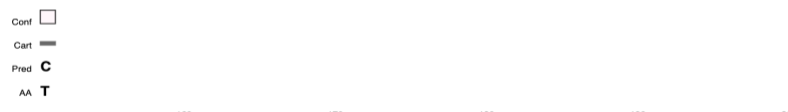

**Legend:**  
 Strand (Yellow bar)  
 Helix (Pink bar)  
 Coil (Grey bar)  
 Conf: - Confidence of prediction  
 Cart: 3-state assignment cartoon  
 Pred: 3-state prediction  
 AA: Target Sequence

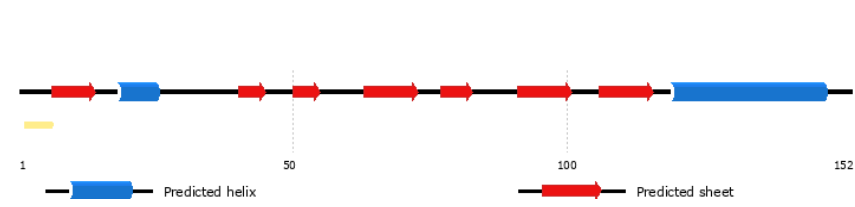



## Supplementary Figure 9:

### The predicted normalized B-factor of predicted secondary structure of Uncharacterized protein LOC110648447 isoforms using I-TASSER server

B-factor is a value to indicate the extent of the inherent thermal mobility of residues/atoms in proteins. In I-TASSER, this value is deduced from threading template proteins from the PDB in combination with the sequence profiles derived from sequence databases. The reported B-factor profile in the figure below corresponds to the normalized B-factor of the target protein, defined by  $B = (B' - u) / s$ , where  $B'$  is the raw B-factor value,  $u$  and  $s$  are respectively the mean and standard deviation of the raw B-factors along the sequence.

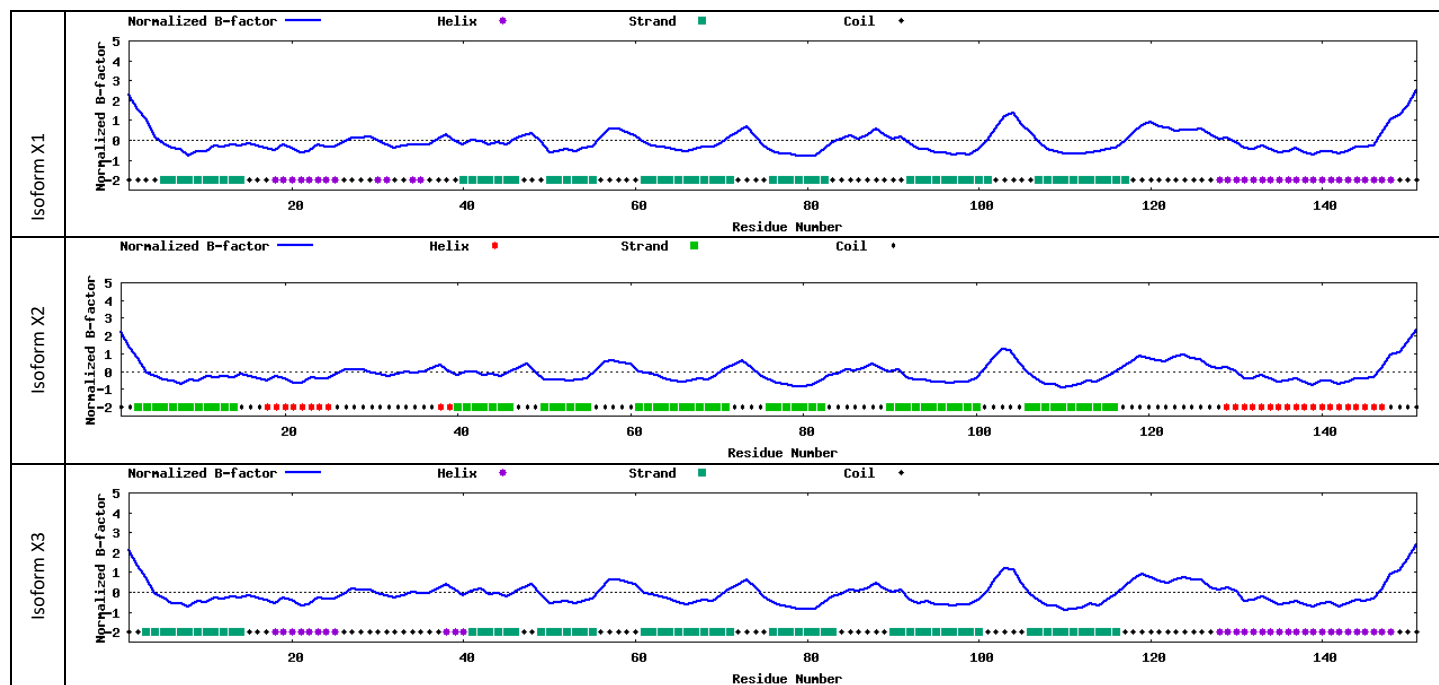

# **Supplementary Tables**

## Supplementary Table 1:

### Identification results of the selected 1D-PAGE band and 2D-PAGE spots by ESI-QUAD-TOF mass spectrometry (MS/MS) analysis

| ID      | Protein name                                                                           | Genbank        | Theoretical pI/MW | Observed pI/MW | Hit peptide fragments                                                                                                                                  | Sequence coverage (%) | emPAI | Fold changes* |
|---------|----------------------------------------------------------------------------------------|----------------|-------------------|----------------|--------------------------------------------------------------------------------------------------------------------------------------------------------|-----------------------|-------|---------------|
| 1D band | Uncharacterized protein LOC110648447 isoform X1<br>[ <i>H. brasiliensis</i> ]          | XP_021658364.1 | 5.2/17.0          | -/18.0         | K.LDSYIQNK.L<br>K.NSSELITENSR.G<br>R.KVEYGPDSQNIK.N<br>K.LAYTVTDGDILQK.Y<br>K.TFQAEIYPNTGK.W<br>R.GKLAYTVTDGDILQK.Y<br>K.IQDSANSFPEAAPNLYSSIAVSGTGVR.K | 56.9                  | 5.25  | n/a           |
|         | Uncharacterized protein LOC110648447 isoform X3<br>[ <i>H. brasiliensis</i> ]          | XP_021658366.1 | 5.1/16.6          |                | R.KVEYGPDSQNIK.T<br>K.TSSELITENSLGK.L<br>K.LAYTVTAGDILQK.Y<br>K.TLTELDNYIQNK.S<br>K.YDVNNFQAVIIHPNSEK.W<br>K.IQDSANSFPEAAPNLYSSIAVSGTGVR.K             | 62.0                  | 3.96  |               |
|         | Oxygen-evolving enhancer protein 3-2, chloroplastic-like<br>[ <i>H. brasiliensis</i> ] | XP_021639605.1 | 9.5/24.4          |                | R.YDLNNTVISAK.S<br>K.AWPYVQNDLR.L<br>K.LFQISDLDHAAK.I<br>R.FFIQPLEPAQAAAR.A<br>K.VGPPPPPSGGLPGTLNSDQPR.D                                               | 29.9                  | 1.51  |               |
| C1      | 17.3 kDa class I heat shock protein-like<br>[ <i>H. brasiliensis</i> ]                 | XP_021675560.1 | 6.0/18.4          | 6.5/22.0       | R.SELASETSAFANTR.M                                                                                                                                     | 8.0                   | 0.22  | -1.308        |
| C2      | Superoxide dismutase [Cu-Zn]-like<br>[ <i>H. brasiliensis</i> ]                        | XP_021640614.1 | 5.6/15.4          | 6.4/18.0       | K.HIPLSGPNSIIGR.A                                                                                                                                      | 8.0                   | 0.26  | -1.779        |
| C3      | ATP synthase subunit D, mitochondrial-like<br>[ <i>H. brasiliensis</i> ]               | XP_021666672.1 | 5.1/19.8          | 5.3/26.5       | K.KVTDVAFK.A<br>K.EAYDSIEVPK.Y<br>R.AFDEVNSTLQTK.F<br>K.YVDTVTPQYKPK.F                                                                                 | 29.0                  | 3.2   | -2.597        |

| ID | Protein name                                                                                                                                | Genbank        | Theoretical pI/MW | Observed pI/MW | Hit peptide fragments                                                                                   | Sequence coverage (%) | emPAI | Fold changes*                     |
|----|---------------------------------------------------------------------------------------------------------------------------------------------|----------------|-------------------|----------------|---------------------------------------------------------------------------------------------------------|-----------------------|-------|-----------------------------------|
|    |                                                                                                                                             |                |                   |                | R.RAFDEVNSTLQTK.F<br>K.FSQEPEPIDWEYYR.K<br>R.LVDMYKEAYDSIEVPK.Y                                         |                       |       |                                   |
| C4 | Universal stress protein PHOS34<br>[ <i>H. brasiliensis</i> ]                                                                               | XP_021668720.1 | 5.7/18.3          | 6.0/20.0       | R.VGVAVDFSPCSRK.A                                                                                       | 18.0                  | 0.21  | -1.847                            |
|    | Probable phospholipid hydroperoxide glutathione peroxidase<br>[ <i>H. brasiliensis</i> ]                                                    | XP_021674982.1 | 8.8/26.5          |                | R.GNDVDLSTYKGG.V                                                                                        | 5.0                   | 0.21  |                                   |
| C5 | Putative cytochrome c oxidase subunit II PS17 (Fragments)<br>[ <i>Pinus strobus</i> ]                                                       | PS17_PINST     | 9.6/17.1          | 5.9/18.5       | R.VVEALSPR.-                                                                                            | 50.0                  | 3.44  | -8.712                            |
| N1 | Uncharacterized protein LOC110648447 isoform X2 and isoform X3<br>[ <i>H. brasiliensis</i> ]<br>(Protein matching the same set of peptides) | XP_021658365.1 | 5.3/16.7          | 4.7/17.7       | R.KVEYGPDSQNIK.T<br>K.TSSELITENSLGK.L<br>K.LAYTVTAGDILQK.Y<br>K.TLTELDNYIQNK.S<br>K.YDVNNFQAVIIHPNSEK.W | 35.0                  | 1.87  | Undetectable in control treatment |
|    |                                                                                                                                             | XP_021658366.1 | 5.1/16.6          |                |                                                                                                         |                       |       |                                   |
|    | Uncharacterized protein LOC110648447 isoform X1<br>[ <i>H. brasiliensis</i> ]                                                               | XP_021658366.1 | 5.2/17.0          |                | K.NSSELITENSR.G<br>R.KVEYGPDSQNIK.N<br>K.LAYTVTDGDILQK.Y<br>K.TFQAEIYPNTGK.W                            | 32.5                  | 1.29  |                                   |
|    | Peroxiredoxin-2E-2, chloroplast-like<br>[ <i>H. brasiliensis</i> ]                                                                          | XP_021644838.1 | 8.4/24.3          |                | R.YALLAEDGVVK.V<br>K.SIFFAVPGAFTPTCSQK.H                                                                | 12.2                  | 0.34  |                                   |
| N2 | Uncharacterized protein LOC110648447 isoform X1<br>[ <i>H. brasiliensis</i> ]                                                               | XP_021658364.1 | 5.2/17.0          | 4.9/17.3       | K.NSSELITENSR.G<br>R.KVEYGPDSQNIK.N<br>K.TLAKLDSYIQNK.L<br>K.LAYTVTDGDILQK.Y<br>K.TFQAEIYPNTGK.W        | 60.0                  | 4.25  | Undetectable in control treatment |

| ID | Protein name                                                                             | Genbank        | Theoretical pI/MW | Observed pI/MW | Hit peptide fragments                                                                                                                                                                                    | Sequence coverage (%) | emPAI | Fold changes*                     |
|----|------------------------------------------------------------------------------------------|----------------|-------------------|----------------|----------------------------------------------------------------------------------------------------------------------------------------------------------------------------------------------------------|-----------------------|-------|-----------------------------------|
|    |                                                                                          |                |                   |                | R.ILELDEEIAVITVK.T<br>R.GKLAYTVTDGDILQK.Y<br>K.IQDSANSFPEAAPNLYSSIAVSGTGVR.K                                                                                                                             |                       |       |                                   |
|    | Uncharacterized protein LOC110648447 isoform X3<br><i>[H. brasiliensis]</i>              | XP_021658366.1 | 5.1/16.6          |                | R.KVEYGPDSQNIK.T<br>K.TSSELITENSLGK.L<br>K.LAYTVTAGDILQK.Y<br>K.TLTELDNYIQNK.S<br>K.YDVNNFQAVIIHPNSEK.W<br>K.IQDSANSFPEAAPNLYSSIAVSGTGVR.K                                                               | 62.3                  | 2.55  |                                   |
|    | Thylakoid luminal 17.4 kDa protein, chloroplastic isoform X1<br><i>[H. brasiliensis]</i> | XP_021662359.1 | 6.7/25.7          |                | K.AYAVGASFK.G<br>K.ANLQGAVFK.N<br>K.SLAAALMSDAK.F<br>K.GVDFSNVLDLDR.V<br>K.FDGADMSEVVMSK.A                                                                                                               | 22.3                  | 1.06  |                                   |
| N3 | Uncharacterized protein LOC110648447 isoform X3<br><i>[H. brasiliensis]</i>              | XP_021658366.1 | 5.1/16.6          | 5.2/16.3       | K.SLPDTFWTK.I<br>R.KVEYGPDSQNIK.T<br>K.TSSELITENSLGK.L<br>K.LAYTVTAGDILQK.Y<br>K.TLTELDNYIQNK.S<br>R.ALQLDAEIAVIAVK.T<br>K.WVGWTWTYNYLPENK.A<br>K.YDVNNFQAVIIHPNSEK.W<br>K.IQDSANSFPEAAPNLYSSIAVSGTGVR.K | 81.0                  | 5.69  | Undetectable in control treatment |
|    | Uncharacterized protein LOC110648447 isoform X1<br><i>[H. brasiliensis]</i>              | XP_021658364.1 | 5.2/17.0          |                | K.SLPDTFWTK.I<br>K.NSSELITENSR.G<br>R.KVEYGPDSQNIK.N<br>K.LAYTVTDGDILQK.Y<br>K.TFQAEIIPNTGK.W<br>R.ILELDEEIAVITVK.T<br>R.GKLAYTVTDGDILQK.Y<br>K.VKTFQAEIIPNTGK.W<br>K.IQDSANSFPEAAPNLYSSIAVSGTGVR.K      | 68.2                  | 5.46  |                                   |



| ID | Protein name                                                                                                                                | Genbank        | Theoretical pI/MW | Observed pI/MW | Hit peptide fragments                                                                                                                                                                   | Sequence coverage (%) | emPAI | Fold changes*                     |
|----|---------------------------------------------------------------------------------------------------------------------------------------------|----------------|-------------------|----------------|-----------------------------------------------------------------------------------------------------------------------------------------------------------------------------------------|-----------------------|-------|-----------------------------------|
|    | Uncharacterized protein LOC110648447 isoform X2<br>[ <i>H. brasiliensis</i> ]                                                               | XP_021658365.1 | 5.3/16.7          |                | R.KVEYGPDSQNIK.T<br>K.TSSELITENSLGK.L<br>K.LAYTVTAGDILQK.Y<br>K.TLTELDNYIQNK.S<br>R.ALQLDAEIAVIAVK.T<br>K.WVGWTWTYNYLPENK.A<br>K.YDVNNFQAVIIHPNSEK.W<br>K.IQDSANSFPQAAPSLYTSILISGTGVR.K | 82.1                  | 4.42  |                                   |
|    | Thylakoid luminal 16.5 kDa protein, chloroplastic isoform X1<br>[ <i>H. brasiliensis</i> ]                                                  | XP_021657916.1 | 9.3/25.2          |                | K.TQVDTFNSSLASLISSVTSNDIESSK.I                                                                                                                                                          | 10.9                  | 0.15  |                                   |
| N4 | Aminotran_3 domaincontaining protein<br>[ <i>Cephalotus follicularis</i> ]                                                                  | GAV65601.1     | 6.4/51.0          | 6.3/17.0       | K.SDFLNALR.S                                                                                                                                                                            | 1.0                   | 0.07  | Undetectable in control treatment |
| N5 | Uncharacterized protein LOC110648447 isoform X1<br>[ <i>H. brasiliensis</i> ]                                                               | XP_021658364.1 | 5.2/17.0          | 5.5/17.3       | K.LDSYIQNK.L<br>K.NSSELITENSR.G<br>R.KVEYGPDSQNIK.N<br>K.TLAKLDSYIQNK.L<br>K.LAYTVTDGDILQK.Y<br>K.TFQAEIIPNTGK.W<br>K.LAYTVTDGDILQKYK.V                                                 | 40.0                  | 3.22  | +2.959                            |
|    | Uncharacterized protein LOC110648447 isoform X2 and isoform X3<br>[ <i>H. brasiliensis</i> ]<br>(Protein matching the same set of peptides) | XP_021658365.1 | 5.3/16.7          |                | R.KVEYGPDSQNIK.T                                                                                                                                                                        | 24.5                  | 0.87  |                                   |
|    |                                                                                                                                             | XP_021658366.1 | 5.1/16.6          |                | K.LAYTVTAGDILQK.Y<br>K.TLTELDNYIQNK.S                                                                                                                                                   |                       |       |                                   |
| N6 | Uncharacterized protein LOC110648447 isoform X1                                                                                             | XP_021658364.1 | 5.2/17.0          | 5.7/17.3       | K.NSSELITENSR.G                                                                                                                                                                         | 7.0                   | 0.22  | +2.913                            |

| ID | Protein name                                                                                  | Genbank        | Theoretical<br>pI/MW | Observed<br>pI/MW | Hit peptide fragments                                                               | Sequence<br>coverage<br>(%) | emPAI | Fold changes*                           |
|----|-----------------------------------------------------------------------------------------------|----------------|----------------------|-------------------|-------------------------------------------------------------------------------------|-----------------------------|-------|-----------------------------------------|
|    | [ <i>H. brasiliensis</i> ]                                                                    |                |                      |                   |                                                                                     |                             |       |                                         |
| N7 | Metalloendoproteinase<br>5-MMP-like<br>[ <i>H. brasiliensis</i> ]                             | XP_021637894.1 | 7.0/34.4             | 7.0/20.5          | R.SAVQVIDEK.V<br>R.TLAHAFAPEDGR.F<br>R.HLSQDDIDGIHALYS.-<br>K.KWADVVSQFTFEEAAAGSK.S | 6.0                         | 0.53  | Undetectable<br>in control<br>treatment |
|    | Cytochrome b6-f complex<br>iron-sulfur subunit,<br>chloroplatic<br>[ <i>H. brasiliensis</i> ] | XP_021668850.1 | 7.65/24.5            |                   | K.DAIGNDIFADQWLK.T                                                                  | 6.6                         | 0.16  |                                         |

\* : "- fold" is downregulated and "+ fold" is upregulated

## Supplementary Table 2:

### Location of predicted cis-acting elements on the promoter region of Uncharacterized protein LOC110648447

| Factor or Site Name | Loc. (Str.) | Signal Sequence | SITE #  | Factor or Site Name | Loc. (Str.) | Signal Sequence | SITE #  |
|---------------------|-------------|-----------------|---------|---------------------|-------------|-----------------|---------|
| POLLEN1LELAT52      | 13 (+)      | AGAAA           | S000245 | CARGCW8GAT          | 230 (+)     | CWWWWWWWG       | S000431 |
| ANAERO1CONSENSUS    | 15 (+)      | AAACAAA         | S000477 | ARR1AT              | 241 (-)     | NGATT           | S000454 |
| ANAERO1CONSENSUS    | 20 (+)      | AAACAAA         | S000477 | GTGANTG10           | 243 (-)     | GTGA            | S000378 |
| DOFCOREZM           | 24 (+)      | AAAG            | S000265 | CACTFTPPCA1         | 248 (-)     | YACT            | S000449 |
| DOFCOREZM           | 29 (+)      | AAAG            | S000265 | POLASIG3            | 269 (+)     | AATAAT          | S000088 |
| EBOXBNNAPA          | 33 (-)      | CANNTG          | S000144 | ROOTMOTIFTAPOX1     | 272 (-)     | ATATT           | S000098 |
| MYCCONSENSUSAT      | 33 (-)      | CANNTG          | S000407 | TATAPVTRNALEU       | 274 (-)     | TTTATATA        | S000340 |
| EBOXBNNAPA          | 33 (+)      | CANNTG          | S000144 | TATABOX4            | 274 (+)     | TATATAA         | S000111 |
| MYCCONSENSUSAT      | 33 (+)      | CANNTG          | S000407 | TATABOX2            | 276 (+)     | TATAAAT         | S000109 |
| NODCON2GM           | 39 (-)      | CTCTT           | S000462 | POLASIG3            | 281 (-)     | AATAAT          | S000088 |
| OSE2ROOTNODULE      | 39 (-)      | CTCTT           | S000468 | TATABOX3            | 283 (+)     | TATTAAT         | S000110 |
| POLASIG3            | 47 (-)      | AATAAT          | S000088 | POLASIG2            | 287 (+)     | AATTAAT         | S000081 |
| TATABOX5            | 48 (+)      | TTATTT          | S000203 | GATABOX             | 296 (+)     | GATA            | S000039 |
| GATABOX             | 62 (+)      | GATA            | S000039 | SORLREP3AT          | 297 (-)     | TGTATATAT       | S000488 |
| GATABOX             | 66 (+)      | GATA            | S000039 | CAATBOX1            | 304 (+)     | CAAT            | S000028 |
| RAV1AAT             | 82 (+)      | CAACA           | S000314 | TATABOX5            | 315 (-)     | TTATTT          | S000203 |
| DPBFCOREDCDC3       | 88 (+)      | ACACNNG         | S000292 | ARR1AT              | 320 (+)     | NGATT           | S000454 |
| CACTFTPPCA1         | 93 (-)      | YACT            | S000449 | EECCRCAH1           | 321 (+)     | GANTTNC         | S000494 |
| TATABOX4            | 97 (+)      | TATATAA         | S000111 | GT1CONSENSUS        | 322 (-)     | GRWAAW          | S000198 |
| GTGANTG10           | 112 (+)     | GTGA            | S000378 | GATABOX             | 333 (+)     | GATA            | S000039 |
| REALPHALGLHCB21     | 121 (+)     | AACCAA          | S000362 | GT1CONSENSUS        | 333 (+)     | GRWAAW          | S000198 |
| SEF4MOTIFGM7S       | 137 (-)     | RTTTTTR         | S000103 | IBOXCORE            | 333 (+)     | GATAA           | S000199 |
| TATABOX3            | 142 (-)     | TATTAAT         | S000110 | GT1CONSENSUS        | 341 (+)     | GRWAAW          | S000198 |
| POLASIG1            | 145 (+)     | AATAAA          | S000080 | CARGCW8GAT          | 353 (-)     | CWWWWWWWG       | S000431 |
| GARE2OSREP1         | 161 (+)     | TAACGTA         | S000420 | CARGCW8GAT          | 353 (+)     | CWWWWWWWG       | S000431 |
| ACGTATERD1          | 163 (-)     | ACGT            | S000415 | TATABOX4            | 355 (+)     | TATATAA         | S000111 |
| ACGTATERD1          | 163 (+)     | ACGT            | S000415 | POLASIG2            | 367 (-)     | AATTAAT         | S000081 |
| CCAATBOX1           | 170 (+)     | CCAAT           | S000030 | POLLEN1LELAT52      | 377 (+)     | AGAAA           | S000245 |
| EBOXBNNAPA          | 171 (-)     | CANNTG          | S000144 | EECCRCAH1           | 378 (-)     | GANTTNC         | S000494 |
| MYCCONSENSUSAT      | 171 (-)     | CANNTG          | S000407 | TBOXATGAPB          | 388 (+)     | ACTTTG          | S000383 |
| CAATBOX1            | 171 (+)     | CAAT            | S000028 | DOFCOREZM           | 389 (-)     | AAAG            | S000265 |
| EBOXBNNAPA          | 171 (+)     | CANNTG          | S000144 | WBOXATNPR1          | 401 (+)     | TTGAC           | S000390 |
| MYCCONSENSUSAT      | 171 (+)     | CANNTG          | S000407 | HEXMOTIFTAH3H4      | 402 (-)     | ACGTCA          | S000053 |
| CAATBOX1            | 173 (-)     | CAAT            | S000028 | PALINDROMICCCBOXGM  | 402 (-)     | TGACGTCA        | S000255 |
| CCAATBOX1           | 173 (-)     | CCAAT           | S000030 | ASF1MOTIFCAMV       | 402 (+)     | TGACG           | S000024 |
| GT1CONSENSUS        | 177 (+)     | GRWAAW          | S000198 | PALINDROMICCCBOXGM  | 402 (+)     | TGACGTCA        | S000255 |
| POLLEN1LELAT52      | 182 (-)     | AGAAA           | S000245 | TGACGTVMAMY         | 402 (+)     | TGACGT          | S000377 |
| CACTFTPPCA1         | 187 (+)     | YACT            | S000449 | WRKY71OS            | 402 (+)     | TGAC            | S000447 |
| CACTFTPPCA1         | 199 (-)     | YACT            | S000449 | ACGTCBOX            | 403 (-)     | GACGTC          | S000131 |
| ARR1AT              | 208 (-)     | NGATT           | S000454 | ACGTCBOX            | 403 (+)     | GACGTC          | S000131 |
| ROOTMOTIFTAPOX1     | 221 (-)     | ATATT           | S000098 | TGACGTVMAMY         | 404 (-)     | TGACGT          | S000377 |
| ROOTMOTIFTAPOX1     | 222 (+)     | ATATT           | S000098 | ACGTATERD1          | 404 (-)     | ACGT            | S000415 |
| DOFCOREZM           | 230 (-)     | AAAG            | S000265 | HEXMOTIFTAH3H4      | 404 (+)     | ACGTCA          | S000053 |
| TAAAGSTKST1         | 230 (-)     | TAAAG           | S000387 | ACGTATERD1          | 404 (+)     | ACGT            | S000415 |
| CARGCW8GAT          | 230 (-)     | CWWWWWWWG       | S000431 | ASF1MOTIFCAMV       | 405 (-)     | TGACG           | S000024 |

| Factor or Site Name | Loc.(Str.) | Signal Sequence | SITE #  | Factor or Site Name | Loc.(Str.) | Signal Sequence | SITE #  |
|---------------------|------------|-----------------|---------|---------------------|------------|-----------------|---------|
| WBOXATNPR1          | 406 (-)    | TTGAC           | S000390 | POLASIG1            | 563 (+)    | AATAAA          | S000080 |
| WRKY71OS            | 406 (-)    | TGAC            | S000447 | POLASIG2            | 570 (-)    | AATTAAA         | S000081 |
| POLASIG1            | 412 (-)    | AATAAA          | S000080 | CAATBOX1            | 574 (-)    | CAAT            | S000028 |
| CAATBOX1            | 415 (-)    | CAAT            | S000028 | GATABOX             | 577 (+)    | GATA            | S000039 |
| CAATBOX1            | 421 (+)    | CAAT            | S000028 | SEF4MOTIFGM7S       | 581 (-)    | RTTTTTR         | S000103 |
| SEF1MOTIF           | 426 (-)    | ATATTAAW        | S000006 | POLASIG2            | 585 (+)    | AATTAAA         | S000081 |
| POLASIG1            | 426 (+)    | AATAAA          | S000080 | ARR1AT              | 590 (-)    | NGATT           | S000454 |
| ROOTMOTIFTAPOX1     | 430 (-)    | ATATT           | S000098 | IBOXCORENT          | 592 (-)    | GATAAGR         | S000424 |
| MARTBOX             | 438 (+)    | TTWTWTTWTT      | S000067 | IBOX                | 593 (-)    | GATAAG          | S000124 |
| MARTBOX             | 439 (+)    | TTWTWTTWTT      | S000067 | IBOXCORE            | 594 (-)    | GATAA           | S000199 |
| POLASIG3            | 458 (-)    | AATAAT          | S000088 | GATABOX             | 595 (-)    | GATA            | S000039 |
| TATABOX5            | 459 (+)    | TTATTT          | S000203 | POLASIG1            | 601 (+)    | AATAAA          | S000080 |
| GT1CONSENSUS        | 461 (-)    | GRWAAW          | S000198 | TATABOX5            | 604 (-)    | TTATTT          | S000203 |
| GT1CONSENSUS        | 462 (-)    | GRWAAW          | S000198 | POLASIG3            | 605 (+)    | AATAAT          | S000088 |
| CARGCW8GAT          | 469 (-)    | CWWWWWWWWG      | S000431 | POLASIG2            | 608 (+)    | AATTAAA         | S000081 |
| CARGCW8GAT          | 469 (+)    | CWWWWWWWWG      | S000431 | TATABOXOSPAL        | 610 (-)    | TATTTAA         | S000400 |
| INRNTPSADB          | 473 (-)    | YTCANTYY        | S000395 | TATABOX5            | 612 (-)    | TTATTT          | S000203 |
| CAATBOX1            | 483 (-)    | CAAT            | S000028 | POLASIG1            | 613 (+)    | AATAAA          | S000080 |
| CCAATBOX1           | 483 (-)    | CCAAT           | S000030 | POLASIG2            | 620 (-)    | AATTAAA         | S000081 |
| GTGANTG10           | 489 (-)    | GTGA            | S000378 | CAATBOX1            | 624 (-)    | CAAT            | S000028 |
| ROOTMOTIFTAPOX1     | 493 (+)    | ATATT           | S000098 | GATABOX             | 627 (+)    | GATA            | S000039 |
| CARGCW8GAT          | 498 (-)    | CWWWWWWWWG      | S000431 | SEF4MOTIFGM7S       | 631 (-)    | RTTTTTR         | S000103 |
| CARGCW8GAT          | 498 (+)    | CWWWWWWWWG      | S000431 | CACTFTPPCA1         | 639 (-)    | YACT            | S000449 |
| TATABOX5            | 500 (-)    | TTATTT          | S000203 | SORLREP3AT          | 648 (-)    | TGTATATAT       | S000488 |
| POLASIG1            | 501 (+)    | AATAAA          | S000080 | TATABOX5            | 659 (+)    | TTATTT          | S000203 |
| TAAAGSTKST1         | 503 (+)    | TAAAG           | S000387 | GT1CONSENSUS        | 662 (-)    | GRWAAW          | S000198 |
| DOFCOREZM           | 504 (+)    | AAAG            | S000265 | IBOXCORE            | 663 (-)    | GATAA           | S000199 |
| NODCON1GM           | 504 (+)    | AAAGAT          | S000461 | GATABOX             | 664 (-)    | GATA            | S000039 |
| OSE1ROOTNODULE      | 504 (+)    | AAAGAT          | S000467 | GT1CONSENSUS        | 668 (-)    | GRWAAW          | S000198 |
| ARR1AT              | 506 (+)    | NGATT           | S000454 | CACTFTPPCA1         | 697 (-)    | YACT            | S000449 |
| GATABOX             | 515 (+)    | GATA            | S000039 | ECCRCAL1            | 698 (-)    | GANTTNC         | S000494 |
| GATABOX             | 517 (-)    | GATA            | S000039 | INRNTPSADB          | 706 (+)    | YTCANTYY        | S000395 |
| NAPINMOTIFBN        | 524 (-)    | TACACAT         | S000070 | POLLEN1LELAT52      | 710 (-)    | AGAAA           | S000245 |
| GATABOX             | 531 (+)    | GATA            | S000039 | GT1CONSENSUS        | 717 (+)    | GRWAAW          | S000198 |
| GT1CONSENSUS        | 531 (+)    | GRWAAW          | S000198 | ROOTMOTIFTAPOX1     | 720 (-)    | ATATT           | S000098 |
| IBOXCORE            | 531 (+)    | GATAA           | S000199 | POLLEN1LELAT52      | 733 (+)    | AGAAA           | S000245 |
| TAAAGSTKST1         | 533 (+)    | TAAAG           | S000387 | GT1CONSENSUS        | 734 (+)    | GRWAAW          | S000198 |
| DOFCOREZM           | 534 (+)    | AAAG            | S000265 | GT1GMSCAM4          | 734 (+)    | GAAAAA          | S000453 |
| ECCRCAL1            | 537 (-)    | GANTTNC         | S000494 | CACTFTPPCA1         | 747 (-)    | YACT            | S000449 |
| ARR1AT              | 540 (-)    | NGATT           | S000454 | GTGANTG10           | 748 (+)    | GTGA            | S000378 |
| IBOXCORENT          | 542 (-)    | GATAAGR         | S000424 | BIHD1OS             | 749 (-)    | TGTCA           | S000498 |
| IBOX                | 543 (-)    | GATAAG          | S000124 | WRKY71OS            | 749 (+)    | TGAC            | S000447 |
| IBOXCORE            | 544 (-)    | GATAA           | S000199 | GTGANTG10           | 767 (+)    | GTGA            | S000378 |
| GATABOX             | 545 (-)    | GATA            | S000039 | ARR1AT              | 768 (+)    | NGATT           | S000454 |
| POLASIG1            | 551 (+)    | AATAAA          | S000080 | EBOXBNNAPA          | 774 (-)    | CANNTG          | S000144 |
| TATABOX5            | 554 (-)    | TTATTT          | S000203 | MYCCONSUSAT         | 774 (-)    | CANNTG          | S000407 |
| POLASIG3            | 555 (+)    | AATAAT          | S000088 | EBOXBNNAPA          | 774 (+)    | CANNTG          | S000144 |
| POLASIG2            | 558 (+)    | AATTAAA         | S000081 | MYCCONSUSAT         | 774 (+)    | CANNTG          | S000407 |
| TATABOXOSPAL        | 560 (-)    | TATTTAA         | S000400 | GTGANTG10           | 781 (-)    | GTGA            | S000378 |
| TATABOX5            | 562 (-)    | TTATTT          | S000203 | CACTFTPPCA1         | 782 (+)    | YACT            | S000449 |

| Factor or Site Name   | Loc.(Str.) | Signal Sequence | SITE #  | Factor or Site Name | Loc.(Str.) | Signal Sequence | SITE #  |
|-----------------------|------------|-----------------|---------|---------------------|------------|-----------------|---------|
| ARR1AT                | 800 (+)    | NGATT           | S000454 | MYBST1              | 1009 (+)   | GGATA           | S000180 |
| CURECORECR            | 811 (-)    | GTAC            | S000493 | GATABOX             | 1010 (+)   | GATA            | S000039 |
| CURECORECR            | 811 (+)    | GTAC            | S000493 | GATABOX             | 1016 (-)   | GATA            | S000039 |
| CAATBOX1              | 814 (+)    | CAAT            | S000028 | NODCON1GM           | 1017 (-)   | AAAGAT          | S000461 |
| ROOTMOTIFTAPOX1       | 815 (-)    | ATATT           | S000098 | OSE1ROOTNODULE      | 1017 (-)   | AAAGAT          | S000467 |
| GATABOX               | 817 (-)    | GATA            | S000039 | DOFCOREZM           | 1019 (-)   | AAAG            | S000265 |
| CAATBOX1              | 825 (-)    | CAAT            | S000028 | CARGCW8GAT          | 1019 (-)   | CWWWWWWWWG      | S000431 |
| ECCRCRAH1             | 846 (-)    | GANTTNC         | S000494 | CARGCW8GAT          | 1019 (+)   | CWWWWWWWWG      | S000431 |
| CAATBOX1              | 847 (+)    | CAAT            | S000028 | POLASIG1            | 1022 (-)   | AATAAA          | S000080 |
| PYRIMIDINEBOXOSRAMY1A | 852 (+)    | CCTTTT          | S000259 | CAATBOX1            | 1025 (-)   | CAAT            | S000028 |
| DOFCOREZM             | 853 (-)    | AAAG            | S000265 | CACTFTPPCA1         | 1032 (-)   | YACT            | S000449 |
| CAATBOX1              | 861 (+)    | CAAT            | S000028 | POLASIG1            | 1036 (-)   | AATAAA          | S000080 |
| MARABOX1              | 862 (+)    | AATAAAYAAA      | S000063 | TATABOX5            | 1037 (+)   | TTATTT          | S000203 |
| POLASIG1              | 862 (+)    | AATAAA          | S000080 | RAV1AAT             | 1043 (-)   | CAACA           | S000314 |
| TATABOX5              | 865 (-)    | TTATTT          | S000203 | SEF4MOTIFGM7S       | 1060 (+)   | RTTTTTR         | S000103 |
| MARABOX1              | 866 (+)    | AATAAAYAAA      | S000063 | SEF1MOTIF           | 1063 (-)   | ATATTTAWW       | S000006 |
| POLASIG1              | 866 (+)    | AATAAA          | S000080 | TATABOXOSPAL        | 1064 (-)   | TATTTAA         | S000400 |
| TATABOX5              | 869 (-)    | TTATTT          | S000203 | ROOTMOTIFTAPOX1     | 1067 (-)   | ATATT           | S000098 |
| POLASIG1              | 870 (+)    | AATAAA          | S000080 | GATABOX             | 1069 (-)   | GATA            | S000039 |
| REALPHALGLHCB21       | 878 (-)    | AACCAA          | S000362 | GATABOX             | 1075 (-)   | GATA            | S000039 |
| MYBATRD22             | 879 (-)    | CTAACCA         | S000175 | ERELEE4             | 1081 (-)   | AWTTCAAA        | S000037 |
| MYB1AT                | 879 (-)    | WAACCA          | S000408 | TATABOX5            | 1085 (-)   | TTATTT          | S000203 |
| GATABOX               | 888 (+)    | GATA            | S000039 | POLASIG1            | 1086 (+)   | AATAAA          | S000080 |
| GT1CONSENSUS          | 888 (+)    | GRWAAW          | S000198 | TATCCAOSAMY         | 1095 (-)   | TATCCA          | S000403 |
| IBOXCORE              | 888 (+)    | GATAA           | S000199 | MYBST1              | 1096 (+)   | GGATA           | S000180 |
| MARARS                | 890 (-)    | WTTTATRTTTT     | S000064 | GATABOX             | 1097 (+)   | GATA            | S000039 |
| ROOTMOTIFTAPOX1       | 892 (-)    | ATATT           | S000098 | GT1CONSENSUS        | 1106 (+)   | GRWAAW          | S000198 |
| SEF4MOTIFGM7S         | 896 (-)    | RTTTTTR         | S000103 | CACTFTPPCA1         | 1115 (+)   | YACT            | S000449 |
| TATABOX5              | 899 (-)    | TTATTT          | S000203 | CCAATBOX1           | 1122 (+)   | CCAAT           | S000030 |
| POLASIG1              | 900 (+)    | AATAAA          | S000080 | LEAFYATAG           | 1122 (+)   | CCAATGT         | S000432 |
| CACTFTPPCA1           | 913 (-)    | YACT            | S000449 | CAATBOX1            | 1123 (+)   | CAAT            | S000028 |
| GTGANTG10             | 914 (+)    | GTGA            | S000378 | TATAPVTRNALEU       | 1130 (+)   | TTTATATA        | S000340 |
| DOFCOREZM             | 918 (+)    | AAAG            | S000265 | TATABOX4            | 1131 (-)   | TATATAA         | S000111 |
| NTBBF1ARROLB          | 923 (-)    | ACTTTA          | S000273 | GATABOX             | 1136 (-)   | GATA            | S000039 |
| TAAAGSTKST1           | 923 (+)    | TAAAG           | S000387 | MYBST1              | 1136 (-)   | GGATA           | S000180 |
| DOFCOREZM             | 924 (+)    | AAAG            | S000265 | TATCCAOSAMY         | 1136 (+)   | TATCCA          | S000403 |
| CACTFTPPCA1           | 935 (+)    | YACT            | S000449 | CCAATBOX1           | 1139 (+)   | CCAAT           | S000030 |
| ARR1AT                | 944 (+)    | NGATT           | S000454 | CAATBOX1            | 1140 (+)   | CAAT            | S000028 |
| TATABOX4              | 947 (-)    | TATATAA         | S000111 | ATHB6COREAT         | 1140 (+)   | CAATTATTA       | S000399 |
| CACTFTPPCA1           | 957 (-)    | YACT            | S000449 | POLASIG3            | 1142 (-)   | AATAAT          | S000088 |
| DOFCOREZM             | 971 (-)    | AAAG            | S000265 | ARR1AT              | 1152 (-)   | NGATT           | S000454 |
| TAAAGSTKST1           | 971 (-)    | TAAAG           | S000387 | DPBFCOREDCDC3       | 1160 (+)   | ACACNNG         | S000292 |
| POLASIG1              | 983 (-)    | AATAAA          | S000080 | EBOXBNNAPA          | 1161 (-)   | CANNNG          | S000144 |
| CAATBOX1              | 986 (-)    | CAAT            | S000028 | MYCCONSUSUSAT       | 1161 (-)   | CANNNG          | S000407 |
| WBBOXPCWRKY1          | 994 (+)    | TTTGACY         | S000310 | MYCATERD1           | 1161 (-)   | CATGTG          | S000413 |
| WBOXATNPR1            | 995 (+)    | TTGAC           | S000390 | EBOXBNNAPA          | 1161 (+)   | CANNNG          | S000144 |
| WBOXHVIS01            | 996 (+)    | TGACT           | S000442 | MYCATRD22           | 1161 (+)   | CACATG          | S000174 |
| WRKY710S              | 996 (+)    | TGAC            | S000447 | MYCCONSUSUSAT       | 1161 (+)   | CANNNG          | S000407 |
| WBOXNTERF3            | 996 (+)    | TGACY           | S000457 | TATAPVTRNALEU       | 1168 (-)   | TTTATATA        | S000340 |
| CACTFTPPCA1           | 1000 (+)   | YACT            | S000449 | TATABOX4            | 1168 (+)   | TATATAA         | S000111 |
| DOFCOREZM             | 1002 (-)   | AAAG            | S000265 | GT1CONSENSUS        | 1180 (-)   | GRWAAW          | S000198 |

| Factor or Site Name | Loc.(Str.) | Signal Sequence | SITE #  | Factor or Site Name | Loc.(Str.) | Signal Sequence | SITE #  |
|---------------------|------------|-----------------|---------|---------------------|------------|-----------------|---------|
| IBOXCORE            | 1181 (-)   | GATAA           | S000199 | MARTBOX             | 1377 (-)   | TTWTWTTWTT      | S000067 |
| GATABOX             | 1182 (-)   | GATA            | S000039 | POLASIG3            | 1377 (+)   | AATAAT          | S000088 |
| POLASIG1            | 1191 (-)   | AATAAAA         | S000080 | ROOTMOTIFTAPOX1     | 1380 (-)   | ATATT           | S000098 |
| TATABOX3            | 1193 (+)   | TATTAAT         | S000110 | POLASIG3            | 1385 (+)   | AATAAT          | S000088 |
| TATABOX3            | 1194 (-)   | TATTAAT         | S000110 | POLASIG3            | 1388 (+)   | AATAAT          | S000088 |
| ROOTMOTIFTAPOX1     | 1197 (-)   | ATATT           | S000098 | POLASIG3            | 1391 (+)   | AATAAT          | S000088 |
| GATABOX             | 1201 (-)   | GATA            | S000039 | POLASIG3            | 1394 (+)   | AATAAT          | S000088 |
| EBOXBNNAPA          | 1204 (-)   | CANNNG          | S000144 | POLASIG3            | 1397 (+)   | AATAAT          | S000088 |
| MYCCONSENSUSAT      | 1204 (-)   | CANNNG          | S000407 | MARTBOX             | 1400 (-)   | TTWTWTTWTT      | S000067 |
| EBOXBNNAPA          | 1204 (+)   | CANNNG          | S000144 | POLASIG3            | 1400 (+)   | AATAAT          | S000088 |
| MYCCONSENSUSAT      | 1204 (+)   | CANNNG          | S000407 | ROOTMOTIFTAPOX1     | 1403 (-)   | ATATT           | S000098 |
| AMYBOX1             | 1206 (-)   | TAACARA         | S000020 | TATABOX2            | 1405 (+)   | TATAAAT         | S000109 |
| MYBGAHV             | 1206 (-)   | TAACAAA         | S000181 | TATABOX5            | 1408 (-)   | TTATTT          | S000203 |
| GAREAT              | 1206 (-)   | TAACAAR         | S000439 | POLASIG3            | 1409 (+)   | AATAAT          | S000088 |
| CAATBOX1            | 1213 (-)   | CAAT            | S000028 | TATABOX3            | 1413 (-)   | TATTAAT         | S000110 |
| NAPINMOTIFBN        | 1222 (-)   | TACACAT         | S000070 | POLASIG3            | 1416 (+)   | AATAAT          | S000088 |
| GATABOX             | 1227 (-)   | GATA            | S000039 | POLASIG3            | 1419 (+)   | AATAAT          | S000088 |
| CACTFTPPCA1         | 1235 (-)   | YACT            | S000449 | POLASIG3            | 1422 (+)   | AATAAT          | S000088 |
| GTGANTG10           | 1238 (+)   | GTGA            | S000378 | POLASIG3            | 1425 (+)   | AATAAT          | S000088 |
| DOFCOREZM           | 1241 (+)   | AAAG            | S000265 | SEF4MOTIFGM7S       | 1437 (+)   | RTTTTTR         | S000103 |
| CACTFTPPCA1         | 1255 (+)   | YACT            | S000449 | BIHD10S             | 1447 (-)   | TGTCA           | S000498 |
| T/GBOXATPIN2        | 1262 (+)   | AACGTG          | S000458 | WRKY710S            | 1447 (+)   | TGAC            | S000447 |
| ABRERATCAL          | 1262 (+)   | MACGYGB         | S000507 | ECCRCRH1            | 1452 (+)   | GANTTNC         | S000494 |
| ACGTATERD1          | 1263 (-)   | ACGT            | S000415 | GTGANTG10           | 1465 (-)   | GTGA            | S000378 |
| ABRELATERD1         | 1263 (+)   | ACGTG           | S000414 | CAATBOX1            | 1468 (+)   | CAAT            | S000028 |
| ACGTATERD1          | 1263 (+)   | ACGT            | S000415 | ARR1AT              | 1485 (+)   | NGATT           | S000454 |
| MYB1AT              | 1266 (-)   | WAACCA          | S000408 | ECCRCRH1            | 1493 (-)   | GANTTNC         | S000494 |
| IBOXCORE            | 1269 (-)   | GATAA           | S000199 | CAATBOX1            | 1494 (+)   | CAAT            | S000028 |
| GATABOX             | 1270 (-)   | GATA            | S000039 | DOFCOREZM           | 1499 (-)   | AAAG            | S000265 |
| RAV1AAT             | 1276 (-)   | CAACA           | S000314 | RAV1AAT             | 1508 (+)   | CAACA           | S000314 |
| DOFCOREZM           | 1286 (-)   | AAAG            | S000265 | TATABOX5            | 1512 (-)   | TTATTT          | S000203 |
| RAV1AAT             | 1291 (-)   | CAACA           | S000314 | POLASIG1            | 1513 (+)   | AATAAA          | S000080 |
| SEF3MOTIFGM         | 1294 (-)   | AACCCA          | S000115 | GATABOX             | 1530 (+)   | GATA            | S000039 |
| TATABOX5            | 1298 (+)   | TTATTT          | S000203 | GT1CONSENSUS        | 1530 (+)   | GRWAAW          | S000198 |
| POLASIG1            | 1301 (-)   | AATAAA          | S000080 | IBOXCORE            | 1530 (+)   | GATAA           | S000199 |
| MARTBOX             | 1302 (+)   | TTWTWTTWTT      | S000067 | CACTFTPPCA1         | 1546 (-)   | YACT            | S000449 |
| TATABOX5            | 1302 (+)   | TTATTT          | S000203 | TATABOX5            | 1549 (-)   | TTATTT          | S000203 |
| AUXREPSIAA4         | 1314 (-)   | KGTCACAT        | S000026 | POLASIG1            | 1550 (+)   | AATAAA          | S000080 |
| ARR1AT              | 1322 (+)   | NGATT           | S000454 | CAATBOX1            | 1559 (-)   | CAAT            | S000028 |
| CAATBOX1            | 1324 (-)   | CAAT            | S000028 | CERGLUBOX2PSLEGA    | 1561 (+)   | TGAAACT         | S000033 |
| ROOTMOTIFTAPOX1     | 1343 (-)   | ATATT           | S000098 | SEF4MOTIFGM7S       | 1568 (-)   | RTTTTTR         | S000103 |
| NODCON2GM           | 1352 (-)   | CTCTT           | S000462 | TATABOX2            | 1573 (-)   | TATAAAT         | S000109 |
| OSE2ROOTNODULE      | 1352 (-)   | CTCTT           | S000468 | POLASIG2            | 1579 (+)   | AATTAAA         | S000081 |
| ARR1AT              | 1355 (+)   | NGATT           | S000454 | GT1CONSENSUS        | 1585 (-)   | GRWAAW          | S000198 |
| TATABOX3            | 1357 (-)   | TATTAAT         | S000110 | ROOTMOTIFTAPOX1     | 1591 (+)   | ATATT           | S000098 |
| POLASIG3            | 1360 (+)   | AATAAT          | S000088 | GT1CONSENSUS        | 1593 (-)   | GRWAAW          | S000198 |
| MARTBOX             | 1363 (-)   | TTWTWTTWTT      | S000067 | POLASIG2            | 1605 (+)   | AATTAAA         | S000081 |
| POLASIG3            | 1363 (+)   | AATAAT          | S000088 | TATABOXOSPAL        | 1615 (-)   | TATTTAA         | S000400 |
| ROOTMOTIFTAPOX1     | 1366 (-)   | ATATT           | S000098 | TATABOX5            | 1617 (-)   | TTATTT          | S000203 |
| POLASIG3            | 1371 (+)   | AATAAT          | S000088 | POLASIG3            | 1618 (+)   | AATAAT          | S000088 |
| POLASIG3            | 1374 (+)   | AATAAT          | S000088 | ROOTMOTIFTAPOX1     | 1621 (-)   | ATATT           | S000098 |

| Factor or Site Name | Loc.(Str.) | Signal Sequence | SITE #  | Factor or Site Name | Loc.(Str.) | Signal Sequence | SITE #  |
|---------------------|------------|-----------------|---------|---------------------|------------|-----------------|---------|
| GATABOX             | 1625 (-)   | GATA            | S000039 | GATABOX             | 1853 (+)   | GATA            | S000039 |
| ANAERO3CONSENSUS    | 1627 (+)   | TCATCAC         | S000479 | ROOTMOTIFTAPOX1     | 1860 (-)   | ATATT           | S000098 |
| GTGANTG10           | 1630 (-)   | GTGA            | S000378 | ROOTMOTIFTAPOX1     | 1863 (+)   | ATATT           | S000098 |
| CACTFTPPCA1         | 1631 (+)   | YACT            | S000449 | TATABOX3            | 1864 (+)   | TATTAAT         | S000110 |
| NTBBF1ARROLB        | 1632 (+)   | ACTTTA          | S000273 | TATABOX3            | 1865 (-)   | TATTAAT         | S000110 |
| DOFCOREZM           | 1633 (-)   | AAAG            | S000265 | POLASIG3            | 1880 (-)   | AATAAT          | S000088 |
| TAAAGSTKST1         | 1633 (-)   | TAAAG           | S000387 | TATABOX5            | 1881 (+)   | TTATTT          | S000203 |
| TATABOXOSPAL        | 1635 (-)   | TATTTAA         | S000400 | TATABOXOSPAL        | 1882 (+)   | TATTTAA         | S000400 |
| TATABOX5            | 1637 (-)   | TTATTT          | S000203 | POLASIG2            | 1884 (-)   | AATTAAT         | S000081 |
| POLASIG3            | 1638 (+)   | AATAAT          | S000088 | POLASIG3            | 1888 (-)   | AATAAT          | S000088 |
| TATABOX3            | 1653 (+)   | TATTAAT         | S000110 | TATABOX5            | 1889 (+)   | TTATTT          | S000203 |
| TATABOX3            | 1654 (-)   | TATTAAT         | S000110 | TATABOX2            | 1891 (-)   | TATAAAT         | S000109 |
| ROOTMOTIFTAPOX1     | 1657 (-)   | ATATT           | S000098 | MARTBOX             | 1897 (-)   | TTWTTTWT        | S000067 |
| ROOTMOTIFTAPOX1     | 1658 (+)   | ATATT           | S000098 | POLASIG1            | 1897 (+)   | AATAAA          | S000080 |
| POLLEN1LELAT52      | 1664 (+)   | AGAAA           | S000245 | TATABOX5            | 1901 (-)   | TTATTT          | S000203 |
| ECCRCRAH1           | 1665 (-)   | GANTTNC         | S000494 | POLASIG3            | 1902 (+)   | AATAAT          | S000088 |
| ERELEE4             | 1667 (+)   | AWTTCAAA        | S000037 | ARR1AT              | 1905 (-)   | NGATT           | S000454 |
| ROOTMOTIFTAPOX1     | 1673 (-)   | ATATT           | S000098 | ECCRCRAH1           | 1910 (-)   | GANTTNC         | S000494 |
| WRKY71OS            | 1677 (+)   | TGAC            | S000447 | GT1CONSENSUS        | 1910 (+)   | GRWAAW          | S000198 |
| WBOXNTERF3          | 1677 (+)   | TGACY           | S000457 | ARR1AT              | 1913 (-)   | NGATT           | S000454 |
| CACTFTPPCA1         | 1681 (+)   | YACT            | S000449 | CCAATBOX1           | 1919 (+)   | CCAAT           | S000030 |
| DOFCOREZM           | 1683 (-)   | AAAG            | S000265 | CAATBOX1            | 1920 (+)   | CAAT            | S000028 |
| LECPLEACS2          | 1688 (-)   | TAAATAT         | S000465 | ARR1AT              | 1925 (+)   | NGATT           | S000454 |
| ROOTMOTIFTAPOX1     | 1688 (+)   | ATATT           | S000098 | POLASIG3            | 1927 (-)   | AATAAT          | S000088 |
| POLASIG2            | 1692 (-)   | AATTAAT         | S000081 | L1BOXATPDF1         | 1932 (-)   | TAAATGYA        | S000386 |
| GT1CONSENSUS        | 1699 (-)   | GRWAAW          | S000198 | SEF4MOTIFGM7S       | 1938 (-)   | RTTTTTR         | S000103 |
| GT1GMSCAM4          | 1699 (-)   | GAAAAA          | S000453 | CAATBOX1            | 1943 (-)   | CAAT            | S000028 |
| INRNTPSADB          | 1702 (+)   | YTCANTYY        | S000395 | CAATBOX1            | 1949 (+)   | CAAT            | S000028 |
| GTGANTG10           | 1720 (-)   | GTGA            | S000378 | NTBBF1ARROLB        | 1967 (-)   | ACTTTA          | S000273 |
| CAATBOX1            | 1733 (-)   | CAAT            | S000028 | TAAAGSTKST1         | 1967 (+)   | TAAAG           | S000387 |
| CCAATBOX1           | 1733 (-)   | CCAAT           | S000030 | INRNTPSADB          | 1968 (-)   | YTCANTYY        | S000395 |
| GTGANTG10           | 1739 (-)   | GTGA            | S000378 | DOFCOREZM           | 1968 (+)   | AAAG            | S000265 |
| CACTFTPPCA1         | 1740 (+)   | YACT            | S000449 | CACTFTPPCA1         | 1970 (-)   | YACT            | S000449 |
| ANAERO1CONSENSUS    | 1751 (-)   | AAACAAA         | S000477 | GTGANTG10           | 1971 (+)   | GTGA            | S000378 |
| POLASIG1            | 1756 (-)   | AATAAA          | S000080 | GT1CONSENSUS        | 1973 (+)   | GRWAAW          | S000198 |
| CPBCSPOR            | 1758 (+)   | TATTAG          | S000491 | GT1GMSCAM4          | 1973 (+)   | GAAAAA          | S000453 |
| ARR1AT              | 1773 (+)   | NGATT           | S000454 | DOFCOREZM           | 1978 (+)   | AAAG            | S000265 |
| BOXIINTPATPB        | 1776 (-)   | ATAGAA          | S000296 | GATABOX             | 1984 (+)   | GATA            | S000039 |
| ROOTMOTIFTAPOX1     | 1782 (+)   | ATATT           | S000098 | SEF1MOTIF           | 1985 (+)   | ATATTTAWW       | S000006 |
| MARTBOX             | 1799 (+)   | TTWTTTWT        | S000067 | ROOTMOTIFTAPOX1     | 1985 (+)   | ATATT           | S000098 |
| MARTBOX             | 1800 (+)   | TTWTTTWT        | S000067 | POLASIG1            | 1988 (-)   | AATAAA          | S000080 |
| GT1CONSENSUS        | 1805 (-)   | GRWAAW          | S000198 | CACTFTPPCA1         | 1995 (+)   | YACT            | S000449 |
| GT1GMSCAM4          | 1805 (-)   | GAAAAA          | S000453 | ROOTMOTIFTAPOX1     | 1999 (+)   | ATATT           | S000098 |
| POLLEN1LELAT52      | 1807 (-)   | AGAAA           | S000245 | CACTFTPPCA1         | 2003 (+)   | YACT            | S000449 |
| TATAPVTRNALEU       | 1819 (-)   | TTTATATA        | S000340 | NTBBF1ARROLB        | 2004 (+)   | ACTTTA          | S000273 |
| TATABOX4            | 1819 (+)   | TATATAA         | S000111 | DOFCOREZM           | 2005 (-)   | AAAG            | S000265 |
| TATABOX2            | 1827 (-)   | TATAAAT         | S000109 | TAAAGSTKST1         | 2005 (-)   | TAAAG           | S000387 |
| TATAPVTRNALEU       | 1828 (+)   | TTTATATA        | S000340 | POLASIG2            | 2006 (-)   | AATTAAT         | S000081 |
| TATABOX4            | 1829 (-)   | TATATAA         | S000111 | CAATBOX1            | 2010 (-)   | CAAT            | S000028 |
| CARGCW8GAT          | 1844 (-)   | CWWWWWWWWG      | S000431 | ARR1AT              | 2012 (+)   | NGATT           | S000454 |
| CARGCW8GAT          | 1844 (+)   | CWWWWWWWWG      | S000431 | CAATBOX1            | 2014 (-)   | CAAT            | S000028 |

| Factor or Site Name | Loc.(Str.) | Signal Sequence | SITE #  | Factor or Site Name | Loc.(Str.) | Signal Sequence | SITE #  |
|---------------------|------------|-----------------|---------|---------------------|------------|-----------------|---------|
| CCAATBOX1           | 2014 (-)   | CCAAT           | S000030 | EBOXBNNA            | 2212 (-)   | CANNTG          | S000144 |
| GT1CONSENSUS        | 2017 (+)   | GRWAAW          | S000198 | CATATGGMSAUR        | 2212 (-)   | CATATG          | S000370 |
| CACTFTPPCA1         | 2022 (+)   | YACT            | S000449 | MYCCONSENSUSAT      | 2212 (-)   | CANNTG          | S000407 |
| TAAAGSTKST1         | 2030 (+)   | TAAAG           | S000387 | EBOXBNNA            | 2212 (+)   | CANNTG          | S000144 |
| DOFCOREZM           | 2031 (+)   | AAAG            | S000265 | CATATGGMSAUR        | 2212 (+)   | CATATG          | S000370 |
| RAV1AAT             | 2036 (+)   | CAACA           | S000314 | MYCCONSENSUSAT      | 2212 (+)   | CANNTG          | S000407 |
| ROOTMOTIFTAPOX1     | 2040 (+)   | ATATT           | S000098 | PREATPRODH          | 2221 (-)   | ACTCAT          | S000450 |
| CAATBOX1            | 2042 (-)   | CAAT            | S000028 | GCN4OSGLUB1         | 2222 (+)   | TGAGTCA         | S000277 |
| ARR1AT              | 2044 (+)   | NGATT           | S000454 | WBOXHVIS01          | 2224 (-)   | TGACT           | S000442 |
| ANAERO1CONSENSUS    | 2053 (+)   | AAACAAA         | S000477 | WBOXNTERF3          | 2224 (-)   | TGACY           | S000457 |
| TAAAGSTKST1         | 2062 (+)   | TAAAG           | S000387 | WBOXATNPR1          | 2225 (-)   | TTGAC           | S000390 |
| DOFCOREZM           | 2063 (+)   | AAAG            | S000265 | WRKY71OS            | 2225 (-)   | TGAC            | S000447 |
| RAV1AAT             | 2068 (+)   | CAACA           | S000314 | CARGCW8GAT          | 2227 (-)   | CWWWWWWWWG      | S000431 |
| TATABOX5            | 2077 (-)   | TTATTT          | S000203 | CAATBOX1            | 2227 (+)   | CAAT            | S000028 |
| SEF1MOTIF           | 2078 (-)   | ATATTTAWW       | S000006 | CARGCW8GAT          | 2227 (+)   | CWWWWWWWWG      | S000431 |
| POLASIG1            | 2078 (+)   | AATAAA          | S000080 | ROOTMOTIFTAPOX1     | 2228 (-)   | ATATT           | S000098 |
| ROOTMOTIFTAPOX1     | 2082 (-)   | ATATT           | S000098 | ROOTMOTIFTAPOX1     | 2229 (+)   | ATATT           | S000098 |
| TATABOX4            | 2084 (+)   | TATATAA         | S000111 | CACTFTPPCA1         | 2239 (-)   | YACT            | S000449 |
| POLASIG3            | 2090 (-)   | AATAAT          | S000088 | ROOTMOTIFTAPOX1     | 2247 (-)   | ATATT           | S000098 |
| TATABOX5            | 2091 (+)   | TTATTT          | S000203 | ROOTMOTIFTAPOX1     | 2248 (+)   | ATATT           | S000098 |
| POLASIG1            | 2094 (-)   | AATAAA          | S000080 | SEF1MOTIF           | 2256 (-)   | ATATTTAWW       | S000006 |
| TATABOX5            | 2095 (+)   | TTATTT          | S000203 | TATABOXOSPAL        | 2257 (-)   | TATTTAA         | S000400 |
| -300ELEMENT         | 2097 (-)   | TGHAAARK        | S000122 | ROOTMOTIFTAPOX1     | 2260 (-)   | ATATT           | S000098 |
| GT1CONSENSUS        | 2098 (-)   | GRWAAW          | S000198 | LECPLEACS2          | 2261 (-)   | TAAAATAT        | S000465 |
| GT1GMSCAM4          | 2098 (-)   | GAAAAA          | S000453 | ROOTMOTIFTAPOX1     | 2261 (+)   | ATATT           | S000098 |
| INRNTPSADB          | 2101 (+)   | YTCANTYY        | S000395 | CACTFTPPCA1         | 2279 (-)   | YACT            | S000449 |
| CARGCW8GAT          | 2103 (-)   | CWWWWWWWWG      | S000431 | DOFCOREZM           | 2286 (-)   | AAAG            | S000265 |
| CAATBOX1            | 2103 (+)   | CAAT            | S000028 | POLLEN1LELAT52      | 2300 (+)   | AGAAA           | S000245 |
| CARGCW8GAT          | 2103 (+)   | CWWWWWWWWG      | S000431 | CACTFTPPCA1         | 2317 (+)   | YACT            | S000449 |
| GTGANTG10           | 2112 (+)   | GTGA            | S000378 | -300ELEMENT         | 2318 (-)   | TGHAAARK        | S000122 |
| MYBST1              | 2116 (+)   | GGATA           | S000180 | DOFCOREZM           | 2319 (-)   | AAAG            | S000265 |
| GATABOX             | 2117 (+)   | GATA            | S000039 | MYB1AT              | 2325 (+)   | WAACCA          | S000408 |
| CACTFTPPCA1         | 2122 (-)   | YACT            | S000449 | REALPHALGLHCB21     | 2326 (+)   | AACCAA          | S000362 |
| GTGANTG10           | 2123 (+)   | GTGA            | S000378 | ARR1AT              | 2331 (-)   | NGATT           | S000454 |
| GATABOX             | 2129 (+)   | GATA            | S000039 | CARGCW8GAT          | 2334 (-)   | CWWWWWWWWG      | S000431 |
| POLASIG2            | 2134 (+)   | AATTAAA         | S000081 | CARGCW8GAT          | 2334 (+)   | CWWWWWWWWG      | S000431 |
| ARR1AT              | 2139 (-)   | NGATT           | S000454 | CAATBOX1            | 2340 (-)   | CAAT            | S000028 |
| CAATBOX1            | 2149 (-)   | CAAT            | S000028 | CAATBOX1            | 2345 (-)   | CAAT            | S000028 |
| WBOXATNPR1          | 2150 (+)   | TTGAC           | S000390 | ARR1AT              | 2352 (+)   | NGATT           | S000454 |
| BIHD1OS             | 2151 (-)   | TGTCA           | S000498 | POLASIG2            | 2370 (-)   | AATTAAA         | S000081 |
| WRKY71OS            | 2151 (+)   | TGAC            | S000447 | GTGANTG10           | 2379 (-)   | GTGA            | S000378 |
| POLASIG1            | 2163 (+)   | AATAAA          | S000080 | CACTFTPPCA1         | 2380 (+)   | YACT            | S000449 |
| INRNTPSADB          | 2166 (-)   | YTCANTYY        | S000395 | INRNTPSADB          | 2385 (-)   | YTCANTYY        | S000395 |
| CAATBOX1            | 2168 (-)   | CAAT            | S000028 | CAATBOX1            | 2387 (-)   | CAAT            | S000028 |
| GT1CONSENSUS        | 2189 (-)   | GRWAAW          | S000198 | INRNTPSADB          | 2390 (-)   | YTCANTYY        | S000395 |
| POLLEN1LELAT52      | 2191 (-)   | AGAAA           | S000245 | CAATBOX1            | 2392 (-)   | CAAT            | S000028 |
| DOFCOREZM           | 2198 (+)   | AAAG            | S000265 | MYBCOREATCYCB1      | 2397 (+)   | AACGG           | S000502 |
| CACTFTPPCA1         | 2200 (-)   | YACT            | S000449 | CURECORECR          | 2401 (-)   | GTAC            | S000493 |
| SEF1MOTIF           | 2203 (+)   | ATATTTAWW       | S000006 | CURECORECR          | 2401 (+)   | GTAC            | S000493 |
| ROOTMOTIFTAPOX1     | 2203 (+)   | ATATT           | S000098 | CAATBOX1            | 2407 (+)   | CAAT            | S000028 |
| POLASIG1            | 2206 (-)   | AATAAA          | S000080 | GATABOX             | 2421 (-)   | GATA            | S000039 |



| Factor or Site Name | Loc.(Str.) | Signal Sequence | SITE #  | Factor or Site Name | Loc.(Str.) | Signal Sequence | SITE #  |
|---------------------|------------|-----------------|---------|---------------------|------------|-----------------|---------|
| ARR1AT              | 2426 (-)   | NGATT           | S000454 | CACTFTPPCA1         | 2671 (+)   | YACT            | S000449 |
| SEF4MOTIFGM7S       | 2429 (-)   | RTTTTTTR        | S000103 | TATABOX4            | 2674 (+)   | TATATAA         | S000111 |
| INRNTPSADB          | 2431 (-)   | YTCANTYY        | S000395 | ROOTMOTIFTAPOX1     | 2679 (-)   | ATATT           | S000098 |
| ARR1AT              | 2437 (-)   | NGATT           | S000454 | CACTFTPPCA1         | 2683 (+)   | YACT            | S000449 |
| RHERPATEXPA7        | 2439 (-)   | KCACGW          | S000512 | WRKY71OS            | 2695 (+)   | TGAC            | S000447 |
| EBOXBNNAPA          | 2444 (-)   | CANNTG          | S000144 | WBOXNTERF3          | 2695 (+)   | TGACY           | S000457 |
| CATATGGMSAUR        | 2444 (-)   | CATATG          | S000370 | CCAATBOX1           | 2706 (+)   | CCAAT           | S000030 |
| MYCCONSENSUSAT      | 2444 (-)   | CANNTG          | S000407 | CAATBOX1            | 2707 (+)   | CAAT            | S000028 |
| EBOXBNNAPA          | 2444 (+)   | CANNTG          | S000144 | ARR1AT              | 2727 (-)   | NGATT           | S000454 |
| CATATGGMSAUR        | 2444 (+)   | CATATG          | S000370 | CAATBOX1            | 2734 (+)   | CAAT            | S000028 |
| MYCCONSENSUSAT      | 2444 (+)   | CANNTG          | S000407 | ARR1AT              | 2735 (-)   | NGATT           | S000454 |
| RAVIAAT             | 2448 (-)   | CAACA           | S000314 | GTGANTG10           | 2737 (-)   | GTGA            | S000378 |
| ARR1AT              | 2457 (-)   | NGATT           | S000454 | CACTFTPPCA1         | 2743 (-)   | YACT            | S000449 |
| SEF1MOTIF           | 2465 (-)   | ATATTTAWW       | S000006 | DOFCOREZM           | 2750 (+)   | AAAG            | S000265 |
| TATABOX2            | 2465 (+)   | TATAAAT         | S000109 | NODCON2GM           | 2751 (-)   | CTCTT           | S000462 |
| ROOTMOTIFTAPOX1     | 2469 (-)   | ATATT           | S000098 | OSE2ROOTNODULE      | 2751 (-)   | CTCTT           | S000468 |
| ROOTMOTIFTAPOX1     | 2472 (+)   | ATATT           | S000098 | CACTFTPPCA1         | 2757 (-)   | YACT            | S000449 |
| TATABOX4            | 2475 (-)   | TATATAA         | S000111 | -10PEHVPSBD         | 2760 (-)   | TATTCT          | S000392 |
| ROOTMOTIFTAPOX1     | 2479 (+)   | ATATT           | S000098 | T/GBOXATPIN2        | 2777 (+)   | AACGTG          | S000458 |
| MYB1AT              | 2488 (-)   | WAACCA          | S000408 | ABRERATCAL          | 2777 (+)   | MACGYGB         | S000507 |
| TATABOX4            | 2491 (-)   | TATATAA         | S000111 | ACGTATERD1          | 2778 (-)   | ACGT            | S000415 |
| TATABOX4            | 2500 (+)   | TATATAA         | S000111 | ABRELATERD1         | 2778 (+)   | ACGTG           | S000414 |
| ROOTMOTIFTAPOX1     | 2505 (-)   | ATATT           | S000098 | ACGTATERD1          | 2778 (+)   | ACGT            | S000415 |
| ROOTMOTIFTAPOX1     | 2538 (+)   | ATATT           | S000098 | MYBCORE             | 2786 (-)   | CNGTTR          | S000176 |
| ROOTMOTIFTAPOX1     | 2545 (-)   | ATATT           | S000098 | CACTFTPPCA1         | 2805 (+)   | YACT            | S000449 |
| ROOTMOTIFTAPOX1     | 2550 (+)   | ATATT           | S000098 | DOFCOREZM           | 2811 (+)   | AAAG            | S000265 |
| ARR1AT              | 2558 (+)   | NGATT           | S000454 | NODCON1GM           | 2811 (+)   | AAAGAT          | S000461 |
| TATABOX4            | 2568 (-)   | TATATAA         | S000111 | OSE1ROOTNODULE      | 2811 (+)   | AAAGAT          | S000467 |
| TATABOX4            | 2569 (+)   | TATATAA         | S000111 | GATABOX             | 2814 (+)   | GATA            | S000039 |
| ROOTMOTIFTAPOX1     | 2579 (-)   | ATATT           | S000098 | IBOX                | 2814 (+)   | GATAAG          | S000124 |
| ROOTMOTIFTAPOX1     | 2580 (+)   | ATATT           | S000098 | IBOXCORE            | 2814 (+)   | GATAA           | S000199 |
| GT1CONSENSUS        | 2582 (-)   | GRWAAW          | S000198 | IBOXCORENT          | 2814 (+)   | GATAAGR         | S000424 |
| IBOXCORE            | 2583 (-)   | GATAA           | S000199 | NODCON2GM           | 2817 (-)   | CTCTT           | S000462 |
| GATABOX             | 2584 (-)   | GATA            | S000039 | OSE2ROOTNODULE      | 2817 (-)   | CTCTT           | S000468 |
| GATABOX             | 2588 (-)   | GATA            | S000039 | POLLEN1LELAT52      | 2820 (+)   | AGAAA           | S000245 |
| BOXIINTPATPB        | 2596 (-)   | ATAGAA          | S000296 | GT1CONSENSUS        | 2821 (+)   | GRWAAW          | S000198 |
| ARR1AT              | 2611 (+)   | NGATT           | S000454 | GT1GMSCAM4          | 2821 (+)   | GAAAAA          | S000453 |
| ROOTMOTIFTAPOX1     | 2625 (-)   | ATATT           | S000098 | DOFCOREZM           | 2824 (+)   | AAAG            | S000265 |
| ROOTMOTIFTAPOX1     | 2628 (+)   | ATATT           | S000098 | CACTFTPPCA1         | 2831 (+)   | YACT            | S000449 |
| CPBCSPOR            | 2629 (+)   | TATTAG          | S000491 | DOFCOREZM           | 2842 (+)   | AAAG            | S000265 |
| GTGANTG10           | 2636 (-)   | GTGA            | S000378 | NODCON2GM           | 2843 (-)   | CTCTT           | S000462 |
| CACTFTPPCA1         | 2637 (+)   | YACT            | S000449 | OSE2ROOTNODULE      | 2843 (-)   | CTCTT           | S000468 |
| NTBBF1ARROLB        | 2638 (+)   | ACTTTA          | S000273 | CACTFTPPCA1         | 2846 (-)   | YACT            | S000449 |
| DOFCOREZM           | 2639 (-)   | AAAG            | S000265 | GATABOX             | 2851 (+)   | GATA            | S000039 |
| TAAAGSTKST1         | 2639 (-)   | TAAAG           | S000387 | CAATBOX1            | 2855 (+)   | CAAT            | S000028 |
| CACTFTPPCA1         | 2647 (+)   | YACT            | S000449 | SEF4MOTIFGM7S       | 2862 (-)   | RTTTTTTR        | S000103 |
| HDZIP2ATATHB2       | 2651 (-)   | TAATMATTA       | S000373 | DOFCOREZM           | 2868 (-)   | AAAG            | S000265 |
| POLASIG3            | 2653 (-)   | AATAAT          | S000088 | TELOBOXATEEF1AA1    | 2873 (+)   | AAACCCTAA       | S000308 |
| CPBCSPOR            | 2655 (+)   | TATTAG          | S000491 | UP2ATMSD            | 2873 (+)   | AAACCCTA        | S000472 |
| CACTFTPPCA1         | 2659 (-)   | YACT            | S000449 | CCAATBOX1           | 2884 (+)   | CCAAT           | S000030 |
| BOXIINTPATPB        | 2663 (-)   | ATAGAA          | S000296 | LEAFYATAG           | 2884 (+)   | CCAATGT         | S000432 |

| Factor or Site Name | Loc.(Str.) | Signal Sequence | SITE #  | Factor or Site Name | Loc.(Str.) | Signal Sequence | SITE #  |
|---------------------|------------|-----------------|---------|---------------------|------------|-----------------|---------|
| CAATBOX1            | 2885 (+)   | CAAT            | S000028 | HSELIKENTACIDICPR1  | 2941 (-)   | CNNGAANNNTTCNNG | S000056 |
| GT1CONSENSUS        | 2892 (-)   | GRWAAW          | S000198 | HSELIKENTACIDICPR1  | 2941 (+)   | CNNGAANNNTTCNNG | S000056 |
| GTGANTG10           | 2905 (-)   | GTGA            | S000378 | DOFCOREZM           | 2948 (-)   | AAAG            | S000265 |
| CAREOSREP1          | 2908 (+)   | CAACTC          | S000421 | WBOXNTERF3          | 2959 (-)   | TGACY           | S000457 |
| CPBCSPOR            | 2913 (-)   | TATTAG          | S000491 | WRKY71OS            | 2960 (-)   | TGAC            | S000447 |
| ROOTMOTIFTAPOX1     | 2915 (-)   | ATATT           | S000098 | GTGANTG10           | 2961 (-)   | GTGA            | S000378 |
| LECPLEACS2          | 2916 (-)   | TAAAATAT        | S000465 | CAATBOX1            | 2964 (+)   | CAAT            | S000028 |
| ROOTMOTIFTAPOX1     | 2916 (+)   | ATATT           | S000098 | GT1CONSENSUS        | 2978 (+)   | GRWAAW          | S000198 |
| GT1CONSENSUS        | 2920 (-)   | GRWAAW          | S000198 | GT1GMSCAM4          | 2978 (+)   | GAAAAA          | S000453 |
| IBOXCORE            | 2921 (-)   | GATAA           | S000199 | GATABOX             | 2986 (-)   | GATA            | S000039 |
| SREATMSD            | 2921 (+)   | TTATCC          | S000470 | MYBST1              | 2986 (-)   | GGATA           | S000180 |
| GATABOX             | 2922 (-)   | GATA            | S000039 | TATCCAOSAMY         | 2986 (+)   | TATCCA          | S000403 |
| MYBST1              | 2922 (-)   | GGATA           | S000180 | SORLIPLAT           | 3000 (+)   | GCCAC           | S000482 |
| ARR1AT              | 2928 (-)   | NGATT           | S000454 | //                  |            |                 |         |
| E2FCONSENSUS        | 2940 (-)   | WTTSSCSS        | S000476 |                     |            |                 |         |

## Supplementary Table 3:

### The top 10 threading templates used by I-TASSER in predicting the 3D structures of Uncharacterized protein LOC110648447 isoforms

I-TASSER modeling starts from the structure templates identified by LOMETS from the PDB library. LOMETS is a meta-server threading approach containing multiple threading programs, where each threading program can generate tens of thousands of template alignments. I-TASSER only uses the templates of the highest significance in the threading alignments, the significance of which are measured by the Z-score, i.e. the difference between the raw and average scores in the unit of standard deviation. The templates in this section are the 10 best templates selected from the LOMETS threading programs. Usually, one template of the highest Z-score is selected from each threading program, where the threading programs are sorted by the average performance in the large-scale benchmark test experiments.

List of top 10 template of each isoform

| Isoform    | Tools | PDB hit | Name                                                                                                            | Iden1 | Iden2 | Coverage | Normalized Z-score |
|------------|-------|---------|-----------------------------------------------------------------------------------------------------------------|-------|-------|----------|--------------------|
| Isoform X1 | 1     | 4igvA   | Crystal structure of kirola (Act d 11)                                                                          | 0.18  | 0.19  | 0.93     | 2.29               |
|            | 2     | 6ka2A   | Crystal structure of a Thebaine synthase from <i>Papaver somniferum</i> in complex with TBN                     | 0.11  | 0.12  | 0.96     | 3.02               |
|            | 3     | 7mlcA   | PYL10 bound to the ABA pan-antagonist 4a                                                                        | 0.13  | 0.19  | 0.97     | 1.86               |
|            | 4     | 6ka2A   | Crystal structure of a Thebaine synthase from <i>Papaver somniferum</i> in complex with TBN                     | 0.13  | 0.12  | 0.92     | 1.53               |
|            | 5     | 1vjh    | Crystal structure of gene product of At1g24000 from <i>Arabidopsis thaliana</i>                                 | 0.19  | 0.20  | 0.78     | 1.71               |
|            | 6     | 4igvA   | Crystal structure of kirola (Act d 11)                                                                          | 0.19  | 0.19  | 0.93     | 2.68               |
|            | 7     | 1vjh    | Crystal structure of gene product of At1g24000 from <i>Arabidopsis thaliana</i>                                 | 0.15  | 0.20  | 0.78     | 2.85               |
|            | 8     | 4jhgA   | Crystal structure of <i>Medicago truncatula</i> Nodulin 13 (MtN13) in complex with trans-zeatin                 | 0.14  | 0.17  | 0.98     | 1.72               |
|            | 9     | 4m9bA   | Crystal structure of Apo Ara h 8                                                                                | 0.18  | 0.20  | 0.97     | 1.88               |
|            | 10    | 7mlcA   | PYL10 bound to the ABA pan-antagonist 4a                                                                        | 0.13  | 0.19  | 0.94     | 1.25               |
| Isoform X2 | 1     | 4rehA   | Crystal structure of ginseng major latex-like protein 151 (GLP) from <i>Panax ginseng</i> (crystal-1)           | 0.16  | 0.20  | 0.94     | 2.31               |
|            | 2     | 4rehA   | Crystal structure of ginseng major latex-like protein 151 (GLP) from <i>Panax ginseng</i> (crystal-1)           | 0.16  | 0.20  | 0.93     | 3.09               |
|            | 3     | 7mlcA   | PYL10 bound to the ABA pan-antagonist 4a                                                                        | 0.13  | 0.20  | 0.95     | 1.89               |
|            | 4     | 1icx    | Crystal structure of pathogenesis-related protein LIPR10.1A from yellow lupine                                  | 0.10  | 0.15  | 0.93     | 1.66               |
|            | 5     | 1vjh    | Crystal structure of gene product of At1g24000 from <i>Arabidopsis thaliana</i>                                 | 0.16  | 0.20  | 0.75     | 1.77               |
|            | 6     | 4rehA   | Crystal structure of ginseng major latex-like protein 151 (GLP) from <i>Panax ginseng</i> (crystal-1)           | 0.15  | 0.20  | 0.93     | 2.61               |
|            | 7     | 1vjh    | Crystal structure of gene product of At1g24000 from <i>Arabidopsis thaliana</i>                                 | 0.13  | 0.20  | 0.76     | 2.78               |
|            | 8     | 4jhgA   | Crystal structure of <i>Medicago truncatula</i> Nodulin 13 (MtN13) in complex with trans-zeatin                 | 0.14  | 0.16  | 0.98     | 1.84               |
|            | 9     | 7mlcA   | PYL10 bound to the ABA pan-antagonist 4a                                                                        | 0.10  | 0.20  | 0.95     | 1.20               |
|            | 10    | 2i9yA   | Solution structure of <i>Arabidopsis thaliana</i> protein At1g70830, a member of the major latex protein family | 0.17  | 0.20  | 0.95     | 3.22               |
| Isoform X3 | 1     | 4rehA   | Crystal structure of ginseng major latex-like protein 151 (GLP) from <i>Panax ginseng</i> (crystal-1)           | 0.16  | 0.19  | 0.93     | 2.30               |
|            | 2     | 4igvA   | Crystal structure of kirola (Act d 11)                                                                          | 0.16  | 0.16  | 0.93     | 3.03               |
|            | 3     | 7mlcA   | PYL10 bound to the ABA pan-antagonist 4a                                                                        | 0.13  | 0.20  | 0.95     | 1.75               |
|            | 4     | 1icx    | Crystal structure of pathogenesis-related protein LIPR10.1A from yellow lupine                                  | 0.09  | 0.19  | 0.93     | 1.64               |
|            | 5     | 1vjh    | Crystal structure of gene product of At1g24000 from <i>Arabidopsis thaliana</i>                                 | 0.15  | 0.20  | 0.75     | 1.81               |
|            | 6     | 4rehA   | Crystal structure of ginseng major latex-like protein 151 (GLP) from <i>Panax ginseng</i> (crystal-1)           | 0.15  | 0.19  | 0.93     | 2.76               |
|            | 7     | 1vjh    | Crystal structure of gene product of At1g24000 from <i>Arabidopsis thaliana</i>                                 | 0.13  | 0.20  | 0.77     | 2.76               |
|            | 8     | 4c9cA   | Crystal structure of the strawberry pathogenesis-related 10 (PR-10) Fra a 1E protein (Form A)                   | 0.16  | 0.20  | 0.97     | 1.72               |
|            | 9     | 4m9bA   | Crystal structure of Apo Ara h 8                                                                                | 0.16  | 0.19  | 0.96     | 1.95               |
|            | 10    | 7mlcA   | PYL10 bound to the ABA pan-antagonist 4a                                                                        | 0.12  | 0.20  | 0.93     | 1.21               |

The top 10 alignments reported above (in order of their ranking) are from the following threading programs: 1: MUSTER, 2: FFAS-3D, 3: SPARKS-X, 4: HHSEARCH2, 5: HHSEARCH, 6: Neff-PPAS, 7: HHSEARCH, 8: pGenTHREADER, 9: wdPPAS, 10: PROSPECT2. Rank of templates represents the top ten threading templates used by I-TASSER. **Iden1** is the percentage sequence identity of the templates in the threading aligned region with the query sequence. **Iden2** is the percentage sequence identity of the whole template chains with query sequence. **Coverage** represents the coverage of the threading alignment and is equal to the number of aligned residues divided by the length of query protein. **Normalized Z-score** is the normalized Z-score of the threading alignments. Alignment with a Normalized Z-score >1 mean a good alignment and vice versa.

# Supplementary Table 4:

## The alignment of Uncharacterized protein LOC110648447 isoforms with the top 10 threading templates in supplementary table 3

|            | PDB hit  | Alignment                                                                                                                                                     |
|------------|----------|---------------------------------------------------------------------------------------------------------------------------------------------------------------|
| Isoform X1 | Query    | MAFVTATAGVQLIKSLPDTFWTKIQDSANSFPEAAPNLYSSIAVSGTGVRKVEYGPDSQNIKNSSSELIENSRLGKLAYTVDGDILOQKYKVKTFQAEI IYPNTGKWVEWIWTYNYLPEDKTRILELDEEIAVIIVTKTLAKLDSYIQNKLT     |
|            | 1.4igvA  | --DLSGRMVKQVEILSDGIVFYEIFRYRLYLISEMSVNIQGVLDLLEGSVIFFKYTI DGKTAKDIVEAIDE-ETKSVTFKIVEGDLMLELYKTFI IIVQVDTKGEHNSVTFHFEKLEKED----VEPNTLMNFCIEITKDIETYHLK---      |
|            | 2.6ka2A  | SG-LVGKLSLELEVDCCDAEKYNNMYKHGEDV-KKAVPHLCVDVVKISGDPIKEWNVNI DGKTI RSVETTHDDETKTLRHRVFEVDGDMKDFKFKFDTIMVNNPKPDGNGCVVTRSEIEYEK--TNENSPFPDYLOQFGHQAIEDMKNYLRDS-- |
|            | 3.7mlcA  | ---SQCSSTLVKHIKAPLHLVMSIVRRFDE-PQKYKPFISRCVVLEGVSVREVDLKSGLPATKTEVLEILDNEHILGIRIVGGDHLKNY-SSTISLHSETIDGKTGLAIESFVVDVPEGNTKEETCFVFEALIQCNLNSLADVTERLQA         |
|            | 4.6ka2A  | VSGLVGKLSLELEVDCCDAEKYNNMYKHG-EDVKKAVPLC-VDVKIDPDCIKEWNVNI DGKT-IRSV EETHDETKTLRHRVFEVDGDMK--DFKFDITMNVNPKDCVTVTRSEIEYEKTNENSP----TPFDYLOQFGHQAIEDMKNYLRD---  |
|            | 5.1vjh   | STL-KGALS VKFDVKCPADKFFSAFVEDT-----NR-----PFEKNGKTEIEAV-DLVKKT-I-QSGSEIQKYFKTLKGSIAVTPIGVGDGSHVWTFHFEKVHKD---IDDPHSI IDESVKYFKKLEAAILNF--                     |
|            | 6.4igvA  | ---LSGRMVKQVEILSDGIVFYEIFRYRLYLISEMSVNIQGVLDLLEGSVIFFKYTI DGKTAKDIVEAIDEET-KSVTFKIVEGDLMLELYKTFI IIVQVDTKGEHNSVTFHFEKLEKED----VEPNTLMNFCIEITKDIETYHLK---      |
|            | 7.1vjh   | ST-LKGALS VKFDVKCPADKFFSAFVEDT-----NR-----PFEKNGKTEIEAVDLVKKTT-I-QSGSEIQKYFKTLKGSIAVTPIGVGDGSHVWTFHFEKVHKD---IDDPHSI IDESVKYFKKLEAAILNF--                     |
|            | 8.4jhgA  | MG--VITSESEYVSSLSAEKLYRGIVEDNIIYFKALPRFIEKAELEGDGIKKLT FVGD FGS TKQHIDMVDRENCAYTYSVEGIALSPLKIVFEFKLVTPPEEGIVKSTTKYYTKGDDIELSKDYLEAGIERFEGFTKAVESFLLANPD       |
|            | 9.4m9bA  | ---GVFTFEDEITSTVPAKLYNAMKDADSI TKI IDDVKSVEIVEGNGIKKLTIVEDGFEILHKVESIDE-ANYAYNYSVVGVALPTAEKITPETKLVGEPNGGIGKLTLYKHTK-GDAKPDDEBELKKGKAKGEGFLRAIEGYVLANPT       |
|            | 10.7mlcA | S---QCSSTLVKHIKAPLHLVMSIVRRFDEP--QKYKPFISRCVVQKVKVREVDLKSGLPATKSTVEVILDDNEHILGIRIVGGDHLKKNYSSTISLHSETIDGKTGLAIESFVVDVPEG----NTKEETCFVFEALIQCNLNSLAESME        |
| Isoform X2 | Query    | MAFVTATAGVQLIKSQPDTFWTKIQDSANSFQAAPSLYTSILISGTGVRKVEYGPDSQNIKTSSSELIENSLGKLAYTVDAGDILQKYDVNNFQAVI IHPNSEKWGWWTYNYLPENKARALQLDAEIAVIIVTKTLTELDNYIQNKST         |
|            | 1.4rehA  | --GL-TGKLI CQTGIKSDGDFVHELFGTRPHHVFNITPANIQCGLHEGFVVIWNYSIDGNMIAKEEIVAI DEEDKSVTFKVEGHLFEEFKSIVFSVHVDTKGEDNLVTSIDYEKLENE----SVKDPTS YLDFLLSVTRDIEAHLHP---     |
|            | 2.4rehA  | ---LTGKLI CQTGIKSDGDFVHELFGTRPHHVFNITPANIQCGLHEGFVVIWNYSIDGNMIAKEEIVAI DEEDKSVTFKVEGHLFEEFKSIVFSVHVDTKGEDNLVTSIDYEKLENE----SVKDPTS YLDFLLSVTRDIEAHLHP---      |
|            | 3.7mlcA  | ---SQCSSTLVKHIKAPLHLVMSIVRRFDE-PQKYKPFISRCVVQKGVSVREVDLKSGLPATKTEVLEILDNEHILGIRIVGGDHLKNY-SSTISLHSETIDGKTGLAIESFVVDVPEG--NTKEETCFVFEALIQCNLNSLADVTERLQA       |
|            | 4.1icx   | ---GIFAFENEQSSTVA PAKLYKATKDS-DEIFKVI EPI-QSVEINGGTIKKII IHGDH--TSFVLHKLDADEANTYNSIIGEGLESLE--KISYESILP GPGSIGKINVKFHHTKGDVLS--ETVRDQAKFKGLGLFKAIIEGYVLAHPD   |
|            | 5.1vjh   | STL-KGALS VKFDVKCPADKFFSAFVEDT-----NR-----PFEKNGKTEIEAVDLVKKTT-I-QSGSEIQKYFKTLKGSIAVTPIGGGS HVWTFHFEKVHKD---IDDPHSI IDESVKYFKKLEAAILNF--                      |
|            | 6.4rehA  | ---LTGKLI CQTGIKSDGDFVHELFGTRPHHVFNITPANIQCGLHEGFVVIWNYSIDGNMIAKEEIVAI DEEDKSVTFKVEGHLFEEFKSIVFSVHVDTKGEDNLVTSIDYEKLENE----VVDPTS YLDFLLSVTRDIEAHLHP---       |
|            | 7.1vjh   | ---TLKGALS VKFDVKCPADKFFSAFVEDT-----NR-----PFEKNGKTEIEAVDLVKKTT-I-QSGSEIQKYFKTLKGSIAVTPIGGGS HVWTFHFEKVHKD---IDDPHSI IDESVKYFKKLEAAILNF--                     |
|            | 8.4jhgA  | MG--VITSESEYVSSLSAEKLYRGIVEDNIIYFKALPRFIEKATLEGDGIKKLT FVGD FGS TKQHID-MVDRENCAYTYSVEGIALSPLKIVFEFKLVTPPEEGIVKSTTKYYTKGDDIELSKDYLEAGIERFEGFTKAVESFLLANPD      |
|            | 9.7mlcA  | S---QCSSTLVKHIKAPLHLVMSIVRRFDE-PQKYKPFISRCVVQKGVSVREVDLKSGLPATKSTVEVILDDNEHILGIRIVGGDHLKKNYSSTISLHSETIDGKTGLAIESFVVDVPEG----EGNTKEETCFVFEALIQCNLNSLADVME      |
|            | 10.2i9yA | --SSLVGKLETDVEIKASADKFFHMFAGKPHVSKASPGNIQCGLHEGSIVFVWVVDGGE-AKVAKERIEPDKNLITFRVIEGDLMEKYSKFLITIPKPGGSI VHWHLVEYKISEEVAH----PETLLQFCVEVSKEDIEHLLAEE-           |
| Isoform X3 | Query    | MAFVTATAGVQLIKSLPDTFWTKIQDSANSFPEAAPNLYSSIAVSGTGVRKVEYGPDSQNIKTSSSELIENSLGKLAYTVDAGDILQKYDVNNFQAVI IHPNSEKWGWWTYNYLPENKARALQLDAEIAVIIVTKTLTELDNYIQNKST        |
|            | 1.4rehA  | ---GLTGKLI CQTGIKSDGDFVHELFGTRPHHVFNITPANIQCGLHEGFVVIWNYSIDGNMIAKEEIVAI DE-EDKSVTFKVEGHLFEEFKSIVFSVHVDTKGEDNLVTSIDYEKLENE----SVKDPTS YLDFLLSVTRDIEAHLHP---    |
|            | 2.4igvA  | ---LSGRMVKQVEILSDGIVFYEIFRYRLYLISEMSVNIQGVLDLEGNWVIFFKYTI DGK-EKTAKDIVEDEETKSVTFKIVEGDLMLELYKTFI IIVQVDTKGEHNSVTFHFEKLEKED----KEDVEEPNTLMNFCIEITKDIETYHLK---  |
|            | 3.7mlcA  | ---SQCSSTLVKHIKAPLHLVMSIVRRFDE-PQKYKPFISRCVVQKGVSVREVDLKSGLPKSTEVLEILDNEHILGIRIVGGDHLKNY-SSTISLHSETIDGKTGLAIESFVVDVPEG--NTKEETCFVFEALIQCNLNSLADVTERLQA        |
|            | 4.1icx   | ---GIFAFENEQSSTVA PAKLYKATKDS-DEIFKVI EPI-QSVEINGGTIKKII IHGDH--TSFVLHKLDADEALTYNSIIGEGLESLE--KISYESILP GPGSIGKINVKFHHTKGDVLS--ETVRDQAKFKGLGLFKAIIEGYVLAHPD   |
|            | 5.1vjh   | STL-KGALS VKFDVKCPADKFFSAFVEDT-----NR-----PFEKNGKTEIEAVDLVKKTT-I-QSGSEIQKYFKTLKGSIAVTPIGVGDGSHVWTFHFEKVHKD---IDDPHSI IDESVKYFKKLEAAILNF--                     |
|            | 6.4rehA  | ---LTGKLI CQTGIKSDGDFVHELFGTRPHHVFNITPANIQCGLHEGSVVIWNYSIDGNMIAKEEIVAI DEEDKSVTFKVEGHLFEEFKSIVFSVHVDTKGEDNLVTSIDYEKLENE----VVDPTS YLDFLLSVTRDIEAHLHP---       |
|            | 7.1vjh   | ST-LKGALS VKFDVKCPADKFFSAFVEDT-----NR-----PFEKNGKTEIEAVDLVKKTT-I-QSGSEIQKYFKTLKGSIAVTPIGVGDGSHVWTFHFEKVHKD---IDDPHSI IDESVKYFKKLEAAILNF--                     |
|            | 8.4c9cA  | MAGV-YTYENEFSTDIAPAKLKFVADANLIFKIAFQAVRCAELEGDGIKKLT FPGY---GYVKHIIHSIDRVNHTYSYSLIEGDALENIEKIDYETKLVAPHGTTI KTKSHTKGDVEIKEEHVKAG-KEKAHLFLKLEGYLKDHPHS         |
|            | 9.4m9bA  | -G--VFTFEDEITSTVPAKLYNAMKDADSI TKI IDDVKSVEIVEGNTIKKLTIVEDG-ETK F I LHKVES-ANYAYNYSVVGVALPTAEKITPETKLVGEPNGGIGKLTLYKHTKGDAPDEEEL-KKGKAKGEGFLRAIEGYVLANPT      |
|            | 10.7mlcA | S---QCSSTLVKHIKAPLHLVMSIVRRFDEP--QKYKPFISRCVVQKVKVREVDLKSGLPATKSTVEVILDDNEHILGIRIVGGDHLKKNYSSTISLHSETIDGKTGLAIESFVVDVPEG----EGNTKEETCFVFEALIQCNLNSLADVME      |

All the residues are colored in black; however, those residues in template which are identical to the residue in the query sequence are highlighted in color. Coloring scheme is based on the property of amino acids, where polar are brightly coloured while non-polar residues are colored in dark shade.

## Supplementary Table 5:

### The top 5 final models of Uncharacterized protein LOC110648447 isoforms predicted by I-TASSER server

For each target, I-TASSER simulations generate a large ensemble of structural conformations, called decoys. To select the final models, I-TASSER uses the SPICKER program to cluster all the decoys based on the pair-wise structure similarity, and reports up to five models which corresponds to the five largest structure clusters. The confidence of each model is quantitatively measured by C-score that is calculated based on the significance of threading template alignments and the convergence parameters of the structure assembly simulations. C-score is typically in the range of [-5, 2], where a C-score of a higher value signifies a model with a higher confidence and vice-versa. TM-score and RMSD are estimated based on C-score and protein length following the correlation observed between these qualities. Since the top 5 models are ranked by the cluster size, it is possible that the lower-rank models have a higher C-score in rare cases. Although the first model has a better quality in most cases, it is also possible that the lower-rank models have a better quality than the higher-rank models as seen in our benchmark tests. If the I-TASSER simulations converge, it is possible to have less than 5 clusters generated; this is usually an indication that the models have a good quality because of the converged simulations.

| Isoform X1 |                                                                                     |                                                                                     |                                                                                       |                                                                                       |                                                                                       |
|------------|-------------------------------------------------------------------------------------|-------------------------------------------------------------------------------------|---------------------------------------------------------------------------------------|---------------------------------------------------------------------------------------|---------------------------------------------------------------------------------------|
| Rank       | 1                                                                                   | 2                                                                                   | 3                                                                                     | 4                                                                                     | 5                                                                                     |
| Model      | 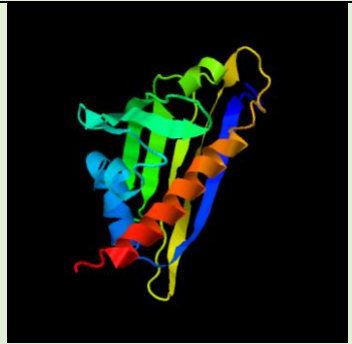   |    |    |    |    |
| C-score    | 0.14                                                                                | -2.27                                                                               | -4.94                                                                                 | -5                                                                                    | -5                                                                                    |
| Note       | Estimated TM-score = 0.73±0.11<br>Estimated RMSD = 4.5±3.0Å                         |                                                                                     |                                                                                       |                                                                                       |                                                                                       |
| Isoform X2 |                                                                                     |                                                                                     |                                                                                       |                                                                                       |                                                                                       |
| Rank       | 1                                                                                   | 2                                                                                   | 3                                                                                     | 4                                                                                     | 5                                                                                     |
| Model      |  |  |  |  |  |
| C-score    | 0.43                                                                                | -5                                                                                  | -2.58                                                                                 | -5                                                                                    | -1.97                                                                                 |
| Note       | Estimated TM-score = 0.77±0.10                                                      |                                                                                     |                                                                                       |                                                                                       |                                                                                       |

|                   |                                                                                   |                                                                                   |                                                                                    |                                                                                     |                                                                                     |
|-------------------|-----------------------------------------------------------------------------------|-----------------------------------------------------------------------------------|------------------------------------------------------------------------------------|-------------------------------------------------------------------------------------|-------------------------------------------------------------------------------------|
|                   | Estimated RMSD = 3.9±2.7Å                                                         |                                                                                   |                                                                                    |                                                                                     |                                                                                     |
| <b>Isoform X3</b> |                                                                                   |                                                                                   |                                                                                    |                                                                                     |                                                                                     |
| Rank              | 1                                                                                 | 2                                                                                 | 3                                                                                  | 4                                                                                   | 5                                                                                   |
| Model             | 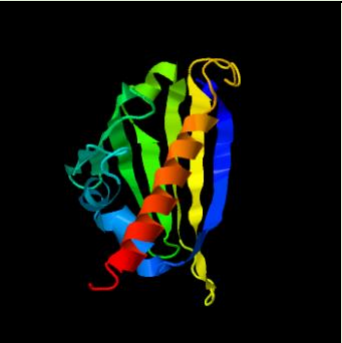 |  |  |  |  |
| C-score           | 0.31                                                                              | -5                                                                                | -2.4                                                                               | -5                                                                                  | -5                                                                                  |
| Note              | Estimated TM-score = 0.75±0.10<br>Estimated RMSD = 4.1±2.8Å                       |                                                                                   |                                                                                    |                                                                                     |                                                                                     |

## Supplementary Table 6:

### The top 10 structurally closed proteins in the PDB to the model of Uncharacterized protein LOC110648447 isoforms predicted by I-TASSER server

After the structure assembly simulation, I-TASSER uses the TM-align structural alignment program to match the first I-TASSER model to all structures in the PDB library. This section reports the top 10 proteins from the PDB that have the closest structural similarity, i.e. the highest **TM-score**, to the predicted I-TASSER model. Due to the structural similarity, these proteins often have similar function to the target. However, users are encouraged to use the data in the next section 'Predicted function using COACH' to infer the function of the target protein, since COACH has been extensively trained to derive biological functions from multi-source of sequence and structure features which has on average a higher accuracy than the function annotations derived only from the global structure comparison.

|            | Rank | PDB hit | Name                                                                                                                   | TM-score | RMSD | IDEN  | Coverage |
|------------|------|---------|------------------------------------------------------------------------------------------------------------------------|----------|------|-------|----------|
| Isoform X1 | 1    | 4igvA   | Crystal structure of kirola (Act d 11)                                                                                 | 0.866    | 1.54 | 0.113 | 0.940    |
|            | 2    | 4rehA   | Crystal structure of ginseng major latex-like protein 151 (GLP) from <i>Panax ginseng</i> (crystal-1)                  | 0.864    | 1.48 | 0.120 | 0.940    |
|            | 3    | 6ka2A   | Crystal structure of a Thebaine synthase from <i>Papaver somniferum</i> in complex with TBN                            | 0.863    | 1.64 | 0.090 | 0.954    |
|            | 4    | 1e09A   | Solution structure of the major cherry allergen Pru av 1                                                               | 0.830    | 2.32 | 0.122 | 0.980    |
|            | 5    | 1fm4A   | Crystal structure of the birch pollen allergen Bet v 1L                                                                | 0.828    | 2.29 | 0.142 | 0.980    |
|            | 6    | 2qimA   | Crystal structure of pathogenesis-related protein LIPR-10.2B from yellow lupine complex with cytokinin                 | 0.811    | 2.54 | 0.116 | 0.974    |
|            | 7    | 3rwsA   | Crystal structure of <i>Medicago truncatula</i> Nodulin 13 (MtN13) in complex2 with trans-zeatin                       | 0.806    | 2.54 | 0.108 | 0.980    |
|            | 8    | 2flhD   | Crystal structure of cytokinin-specific binding protein from mung bean in complex with cytokinin                       | 0.805    | 2.49 | 0.103 | 0.954    |
|            | 9    | 1tw0A   | Native crystal structure of SPE16                                                                                      | 0.802    | 2.53 | 0.074 | 0.980    |
|            | 10   | 2bk0A   | Crystal structure of the major celery allergen Api G 1                                                                 | 0.797    | 2.48 | 0.137 | 0.967    |
| Isoform X2 | 1    | 4rehA   | Crystal structure of ginseng major latex-like protein 151 (GLP) from <i>Panax ginseng</i> (crystal-1)                  | 0.894    | 1.19 | 0.148 | 0.940    |
|            | 2    | 4igvA   | Crystal structure of kirola (Act d 11)                                                                                 | 0.890    | 1.35 | 0.134 | 0.940    |
|            | 3    | 6ka2A   | Crystal structure of a Thebaine synthase from <i>Papaver somniferum</i> in complex with TBN                            | 0.879    | 1.79 | 0.105 | 0.947    |
|            | 4    | 1fskG   | Complex formation between a FAB fragment of a monoclonal IgG antibody and the major allergen from birch pollen Bet v 1 | 0.838    | 2.19 | 0.129 | 0.974    |
|            | 5    | 3c0vD   | Crystal structure of cytokinin-specific binding protein in complex with cytokinin and Ta6Br12                          | 0.835    | 2.15 | 0.113 | 0.940    |
|            | 6    | 3rwsA   | Crystal structure of <i>Medicago truncatula</i> Nodulin 13 (MtN13) in complex2 with trans-zeatin                       | 0.834    | 2.22 | 0.102 | 0.974    |
|            | 7    | 1e09A   | Solution structure of the major cherry allergen Pru av 1                                                               | 0.829    | 2.24 | 0.143 | 0.974    |
|            | 8    | 1tw0B   | Native crystal structure of SPE16                                                                                      | 0.827    | 2.18 | 0.075 | 0.974    |
|            | 9    | 4xrwa   | Crystal structure of the di-domain ARO/CYC BexL from the BE-7585A biosynthetic pathway                                 | 0.825    | 2.18 | 0.090 | 0.954    |
|            | 10   | 2qimA   | Crystal structure of pathogenesis-related protein LIPR-10.2B from yellow lupine complex with cytokinin                 | 0.825    | 2.27 | 0.110 | 0.967    |
| Isoform X3 | 1    | 4rehA   | Crystal structure of ginseng major latex-like protein 151 (GLP) from <i>Panax ginseng</i> (crystal-1)                  | 0.896    | 1.18 | 0.141 | 0.940    |
|            | 2    | 4igvA   | Crystal structure of kirola (Act d 11)                                                                                 | 0.893    | 1.28 | 0.134 | 0.940    |
|            | 3    | 6ka2A   | Crystal structure of a Thebaine synthase from <i>Papaver somniferum</i> in complex with TBN                            | 0.883    | 1.79 | 0.098 | 0.947    |
|            | 4    | 1fm4A   | Crystal structure of the birch pollen allergen Bet v 1L                                                                | 0.839    | 2.22 | 0.129 | 0.974    |
|            | 5    | 3rwsA   | Crystal structure of <i>Medicago truncatula</i> Nodulin 13 (MtN13) in complex2 with trans-zeatin                       | 0.836    | 2.21 | 0.102 | 0.974    |
|            | 6    | 2qimA   | Crystal structure of pathogenesis-related protein LIPR-10.2B from yellow lupine complex with cytokinin                 | 0.830    | 2.23 | 0.096 | 0.967    |
|            | 7    | 1e09A   | Solution structure of the major cherry allergen Pru av 1                                                               | 0.829    | 2.26 | 0.129 | 0.974    |
|            | 8    | 1tw0A   | Native crystal structure of SPE16                                                                                      | 0.823    | 2.30 | 0.068 | 0.974    |
|            | 9    | 2flhD   | Crystal structure of cytokinin-specific binding protein from mung bean in complex with cytokinin                       | 0.822    | 2.31 | 0.112 | 0.940    |
|            | 10   | 4xrwa   | Crystal structure of the di-domain ARO/CYC BexL from the BE-7585A biosynthetic pathway                                 | 0.821    | 2.23 | 0.104 | 0.954    |

Ranking of proteins is based on TM-score of the structural alignment between the query structure and known structures in the PDB library.  
RMSDa is the RMSD between residues that are structurally aligned by TM-align.  
IDENa is the percentage sequence identity in the structurally aligned region.  
Cov represents the coverage of the alignment by TM-align and is equal to the number of structurally aligned residues divided by length of the query protein.

## Supplementary Table 7:

### The predicted functions of Uncharacterized protein LOC110648447 isoforms by COFACTOR and COACH through I-TASSER server

This section reports biological annotations of the target protein by COFACTOR and COACH based on the I-TASSER structure prediction. While COFACTOR deduces protein functions (ligand-binding sites, EC and GO) using structure comparison and protein-protein networks, COACH is a meta-server approach that combines multiple function annotation results (on ligand-binding sites) from the COFACTOR, TM-SITE and S-SITE programs.

| Supplementary Table 7.1: Ligand binding sites |         |              |         |                                                                                                                         |        |                                          |                                                           |
|-----------------------------------------------|---------|--------------|---------|-------------------------------------------------------------------------------------------------------------------------|--------|------------------------------------------|-----------------------------------------------------------|
| Isoform X1                                    |         |              |         |                                                                                                                         |        |                                          |                                                           |
| Rank                                          | C-score | Cluster size | PDB hit | PDB hit name                                                                                                            | Ligand | Ligand name                              | Ligand binding site residues                              |
| 1                                             | 0.15    | 30           | 4a83A   | Crystal structure of major birch allergen Bet v 1 a in complex with deoxycholate                                        | DXC    | Deoxycholate                             | 25, 26, 29, 32, 51, 63, 65, 77, 79, 95, 131, 134, 138     |
| 2                                             | 0.15    | 40           | 3zvU    | Structure of the PYR1 His60Pro mutant in complex with the HAB1 phosphatase and abscisic acid                            | A8S    | Abscisic acid                            | 39, 55, 63, 79, 81, 86, 93, 130, 134, 138                 |
| 3                                             | 0.09    | 33           | 4n3eB   | Crystal structure of Hyp-1, a St John's wort PR-10 protein, in complex with 8-anilo-1-napthalene sulfonate (ANS)        | 2AN    | 8-anilo-1-napthalene sulfonate (ANS)     | 10, 12, 14, 21, 25, 97, 109, 111, 135, 136, 139           |
| 4                                             | 0.06    | 14           | 1fm4A   | Crystal structure of the birch pollen allergen Bet v 1L                                                                 | DXC    | Deoxycholate                             | 25, 32, 53, 65, 79, 93, 95, 113, 115, 131, 138            |
| 5                                             | 0.04    | 10           | 4q0kA   | Crystal structure of phytohormone binding protein from Medicago truncatula in complex with gibberellic acid (GA3)       | GA3    | Gibberellin                              | 25, 32, 36, 53, 55, 63, 97, 134, 135, 138                 |
| Isoform X2                                    |         |              |         |                                                                                                                         |        |                                          |                                                           |
| Rank                                          | C-score | Cluster size | PDB hit | PDB hit name                                                                                                            | Ligand | Ligand name                              | Ligand binding site residues                              |
| 1                                             | 0.24    | 62           | 3ie5A   | Crystal structure of Hyp-1 protein from <i>Hypericum perforatum</i> (St John's wort) involved in hypericin biosynthesis | PG4    | Tetraethylene glycol                     | 25, 40, 86, 114, 138                                      |
| 2                                             | 0.18    | 34           | 4a83A   | Crystal structure of major birch allergen Bet v 1 a in complex with deoxycholate                                        | DXC    | Deoxycholate                             | 25, 26, 29, 30, 32, 51, 64, 66, 77, 79, 95, 131, 134, 138 |
| 3                                             | 0.08    | 31           | 4n3eB   | Crystal structure of Hyp-1, a St John's wort PR-10 protein, in complex with 8-anilo-1-napthalene sulfonate (ANS)        | 2AN    | 8-anilo-1-napthalene sulfonate (ANS)     | 10, 12, 14, 21, 25, 97, 108, 110, 135, 136, 139           |
| 4                                             | 0.07    | 17           | 4a8gA   | Crystal structure of major birch pollen allergen Bet v 1 a in complex with dimethylbenzylammonium propane sulfonate     | DMX    | Dimethylbenzylammonium propane sulfonate | 25, 26, 30, 32, 51, 77, 79, 97, 110, 135                  |
| 5                                             | 0.05    | 13           | 2wqjC   | Crystal structure of the major carrot allergen Dau c 1                                                                  | P4C    | O-acetaldehydyl-hexaethelene glycol      | 25, 40, 77, 97, 110, 135, 138                             |
| Isoform X3                                    |         |              |         |                                                                                                                         |        |                                          |                                                           |
| Rank                                          | C-score | Cluster size | PDB hit | PDB hit name                                                                                                            | Ligand | Ligand name                              | Ligand binding site residues                              |
| 1                                             | 0.26    | 65           | 3ie5A   | Crystal structure of Hyp-1 protein from <i>Hypericum perforatum</i> (St John's wort) involved in hypericin biosynthesis | PG4    | Tetraethylene glycol                     | 25, 40, 86, 114, 138                                      |
| 2                                             | 0.19    | 32           | 4a83A   | Crystal structure of major birch allergen Bet v 1 a in complex with deoxycholate                                        | DXC    | Deoxycholate                             | 25, 26, 29, 30, 32, 51, 64, 66, 77, 79, 95, 131, 134, 138 |
| 3                                             | 0.14    | 32           | 4n3eF   | Crystal structure of Hyp-1, a St John's wort PR-10 protein, in complex with 8-anilo-1-napthalene sulfonate (ANS)        | 2AN    | 8-anilo-1-napthalene sulfonate (ANS)     | 12, 21, 25, 29, 79, 97, 99, 110, 135, 136, 139            |
| 4                                             | 0.04    | 10           | 4c94E   | Crystal structure of the strawberry pathogenesis-related 10 (PR-10) Fra a 3 protein in complex with catechin            | KXN    | Catechin                                 | 29, 39, 53, 55, 66, 134, 138                              |



|   |      |   |       |                                                                                                                                             |     |                                       |                                                       |
|---|------|---|-------|---------------------------------------------------------------------------------------------------------------------------------------------|-----|---------------------------------------|-------------------------------------------------------|
| 5 | 0.04 | 9 | 4a81A | Crystal structure of major birch pollen allergen Bet v 1 a in ternary complex with 8-anilnaphthalene-1-sulfonate (ANS) and deoxycholic acid | 2AN | 8-anilo-1-naphthalene sulfonate (ANS) | 10, 12, 25, 79, 97, 110, 112, 128, 131, 132, 135, 136 |
|---|------|---|-------|---------------------------------------------------------------------------------------------------------------------------------------------|-----|---------------------------------------|-------------------------------------------------------|

Note:  
C-score is the confidence score of the prediction. C-score ranges [0-1], where a higher score indicates a more reliable prediction.  
Cluster size is the total number of templates in a cluster.  
Lig Name is name of possible binding ligand. Click the name to view its information in [the BioLiP database](#)  
Rep is a single complex structure with the most representative ligand in the cluster, i.e., the one listed in the Lig Name column.  
Mult is the complex structures with all potential binding ligands in the cluster

## Supplementary Table 7.2: Enzyme commission (EC) numbers and active sites

| Isoform X1 |                       |         |                                                                                                                          |          |      |       |       |                     |                                    |                      |
|------------|-----------------------|---------|--------------------------------------------------------------------------------------------------------------------------|----------|------|-------|-------|---------------------|------------------------------------|----------------------|
| Rank       | C-score <sup>EC</sup> | PDB hit | PDB hit name                                                                                                             | TM-score | RMSD | IDEN  | Cov   | EC number           | EC name                            | Active site residues |
| 1          | 0.386                 | 2vq5A   | X-ray structure of Norcoclaurine synthase from <i>Thalictrum flavum</i> in complex with dopamine and hydroxybenzaldehyde | 0.741    | 3.03 | 0.101 | 0.980 | 4.2.1.78            | Norcoclaurine synthase             | 49, 68               |
| 2          | 0.252                 | 2de6B   | The reduced complex between oxygenase and ferredoxin in carbazole 1,9a-dioxygenase                                       | 0.607    | 3.89 | 0.056 | 0.874 | 1.14.12.-           | Dioxygenases                       | n/a                  |
| 3          | 0.236                 | 1wqlA   | Cumene dioxygenase (cumA1A2) from <i>Pseudomonas fluorescens</i> IP01                                                    | 0.617    | 3.74 | 0.044 | 0.887 | 1.14.12.-           | Dioxygenases                       | n/a                  |
| 4          | 0.234                 | 1im0A   | Outer membrane phospholipase A from <i>E. coli</i> N156A active site mutant pH 8.3                                       | 0.533    | 4.47 | 0.053 | 0.834 | 3.1.1.32<br>3.1.1.4 | PhospholipaseA1<br>PhospholipaseA2 | n/a                  |
| 5          | 0.234                 | 1z01A   | 2-Oxoquinoline 8-monooxygenase component: Active site modulation by Rieske-[2fe-2S]                                      | 0.609    | 3.72 | 0.035 | 0.868 | 1.14.13.61          | 2-hydroxyquinoline 8-monooxygenase | 27                   |
| Isoform X2 |                       |         |                                                                                                                          |          |      |       |       |                     |                                    |                      |
| Rank       | C-score <sup>EC</sup> | PDB hit | PDB hit name                                                                                                             | TM-score | RMSD | IDEN  | Cov   | EC number           | EC name                            | Active site residues |
| 1          | 0.349                 | 2vq5A   | X-ray structure of Norcoclaurine synthase from <i>Thalictrum flavum</i> in complex with dopamine and hydroxybenzaldehyde | 0.788    | 2.55 | 0.103 | 0.967 | 4.2.1.78            | Norcoclaurine synthase             | 45, 49               |
| 2          | 0.289                 | 1uliC   | Biphenyl dioxygenase (BphA1A2) derived from <i>Rhodococcus sp.</i> strain RHA1                                           | 0.644    | 3.54 | 0.059 | 0.894 | 1.14.12.18          | Biphenyl 2,3-dioxygenase           | n/a                  |
| 3          | 0.289                 | 3en1A   | Crystal structure of Toluene 2,3-dioxygenase                                                                             | 0.650    | 3.53 | 0.066 | 0.901 | 1.14.12.11          | Toluene dioxygenase                | n/a                  |
| 4          | 0.288                 | 2de6B   | The reduced complex between oxygenase and ferredoxin in carbazole 1,9a-dioxygenase                                       | 0.653    | 3.78 | 0.064 | 0.907 | 1.14.12.-           | Dioxygenases                       | n/a                  |
| 5          | 0.287                 | 1wqlA   | Cumene dioxygenase (cumA1A2) from <i>Pseudomonas fluorescens</i> IP01                                                    | 0.639    | 3.63 | 0.074 | 0.901 | 1.14.12.-           | Dioxygenases                       | n/a                  |
| Isoform X3 |                       |         |                                                                                                                          |          |      |       |       |                     |                                    |                      |
| Rank       | C-score <sup>EC</sup> | PDB hit | PDB hit name                                                                                                             | TM-score | RMSD | IDEN  | Cov   | EC number           | EC name                            | Active site residues |
| 1          | 0.415                 | 2vq5A   | X-ray structure of Norcoclaurine synthase from <i>Thalictrum flavum</i> in complex with dopamine and hydroxybenzaldehyde | 0.780    | 2.68 | 0.096 | 0.967 | 4.2.1.78            | Norcoclaurine synthase             | 49                   |
| 2          | 0.281                 | 1ndoA   | Naphthalene 1,2-dioxygenase                                                                                              | 0.639    | 3.70 | 0.110 | 0.901 | 1.14.12.12          | Naphthalene 1,2-dioxygenase        | n/a                  |

|   |       |       |                                                                                                                        |       |      |       |       |           |                               |     |
|---|-------|-------|------------------------------------------------------------------------------------------------------------------------|-------|------|-------|-------|-----------|-------------------------------|-----|
| 3 | 0.274 | 2de6B | The reduced complex between oxygenase and ferredoxin in carbazole 1,9a-dioxygenase                                     | 0.646 | 3.89 | 0.064 | 0.907 | 1.14.12.- | Dioxygenases                  | n/a |
| 4 | 0.236 | 2fy3A | Structures of ligand bound human choline acetyltransferase provides insight into regulation of acetylcholine synthesis | 0.520 | 4.74 | 0.044 | 0.848 | 2.3.1.6   | Choline O-acetyltransferase   | n/a |
| 5 | 0.234 | 1t7nA | Crystal structure of the M564G mutant of murine CrAT                                                                   | 0.523 | 4.63 | 0.074 | 0.854 | 2.3.1.7   | Carnitine O-acetyltransferase | n/a |

Cscore<sup>EC</sup> is the confidence score for the EC number prediction. Cscore<sup>EC</sup> values range in between [0-1]; where a higher score indicates a more reliable EC number prediction.

TM-score is a measure of global structural similarity between query and template protein.

RMSDa is the RMSD between residues that are structurally aligned by TM-align.

IDENa is the percentage sequence identity in the structurally aligned region.

### Supplementary Table 7.3: Consensus prediction of Gene ontology (GO) terms

The table shows a consensus GO terms amongst the 10 top scoring templates. The GO-score associated with each prediction is defined as the average weight of the GO term, where the weights are assigned based on Cscore<sup>GO</sup> of the template

|            | Molecular function                           |          | Biological process                         |          | Cellular component   |          |
|------------|----------------------------------------------|----------|--------------------------------------------|----------|----------------------|----------|
|            | GO term                                      | GO score | GO term                                    | GO score | GO term              | GO score |
| Isoform X1 | GO:0010427 ABA binding                       | 0.39     | GO:0006952 Defense response                | 0.88     | GO:0005737 Cytoplasm | 0.39     |
|            | GO:0004872 Signaling receptor activity       | 0.39     | GO:0009607 Response to biotic stimulus     | 0.88     |                      |          |
|            | GO:0042803 Protein homodimerization activity | 0.39     | GO:0009738 ABA-activated signaling pathway | 0.39     | GO:0005634 Nucleus   | 0.39     |
| Isoform X2 | GO:0016787 Hydrolase activity                | 0.42     | GO:0006952 Defense response                | 0.94     | None was predicted   |          |
|            |                                              |          | GO:0009607 Response to biotic stimulus     | 0.94     |                      |          |
| Isoform X3 | GO:0004872 Signaling receptor activity       | 0.39     | GO:0006952 Defense response                | 0.88     | GO:0005737 Cytoplasm | 0.64     |
|            | GO:0010427 ABA binding                       | 0.39     | GO:0009607 Response to biotic stimulus     | 0.88     |                      |          |
|            | GO:0042803 Protein homodimerization activity | 0.39     | GO:0009738 ABA-activated signaling pathway | 0.39     | GO:0005634 Nucleus   | 0.39     |

### Supplementary Table 7.4: Top 10 homologous GO term templates in PDB

| Isoform X1 |                      |          |                   |                   |      |         |                          |                                                 |
|------------|----------------------|----------|-------------------|-------------------|------|---------|--------------------------|-------------------------------------------------|
| Rank       | Cscore <sup>GO</sup> | TM-score | RMSD <sup>a</sup> | IDEN <sup>a</sup> | Cov  | PDB hit | Associated GO terms      | GO term names                                   |
| 1          | 0.42                 | 0.7778   | 2.56              | 0.14              | 0.96 | 2wq1A   | GO:0006952<br>GO:0009607 | Defense response<br>Response to biotic stimulus |
| 2          | 0.41                 | 0.7887   | 2.64              | 0.10              | 0.97 | 3ie5B   | GO:0006952<br>GO:0009607 | Defense response<br>Response to biotic stimulus |
| 3          | 0.41                 | 0.7967   | 2.48              | 0.14              | 0.97 | 2bk0A   | GO:0006952<br>GO:0009607 | Defense response<br>Response to biotic stimulus |
| 4          | 0.39                 | 0.7631   | 2.83              | 0.12              | 0.97 | 3rt0C   | GO:000575<br>GO:0005634  | Cellular component<br>Nucleus                   |

|                   |                      |          |                   |                   |      |         | GO:0005515<br>GO:0010427<br>GO:0004872<br>GO:0042803<br>GO:0005737<br>GO:0009738 | Protein binding<br>Abscisic acid binding<br>Signaling receptor activity<br>Protein homodimerization activity<br>Cytoplasm<br>Abscisic acid-activated signaling pathway |
|-------------------|----------------------|----------|-------------------|-------------------|------|---------|----------------------------------------------------------------------------------|------------------------------------------------------------------------------------------------------------------------------------------------------------------------|
| 5                 | 0.38                 | 0.7472   | 3.07              | 0.12              | 0.97 | 2k7hA   | GO:0006952<br>GO:0009607                                                         | Defense response<br>Response to biotic stimulus                                                                                                                        |
| 6                 | 0.36                 | 0.6816   | 3.05              | 0.10              | 0.89 | 1z94B   | GO:0006950                                                                       | Response to stress                                                                                                                                                     |
| 7                 | 0.36                 | 0.8304   | 2.32              | 0.12              | 0.98 | 1e09A   | GO:0006952<br>GO:0009607                                                         | Defense response<br>Response to biotic stimulus                                                                                                                        |
| 8                 | 0.35                 | 0.6723   | 2.03              | 0.14              | 0.77 | 1vjhA   | GO:0006952<br>GO:0009607                                                         | Defense response<br>Response to biotic stimulus                                                                                                                        |
| 9                 | 0.34                 | 0.8078   | 2.36              | 0.10              | 0.95 | 2flhB   | GO:0006952<br>GO:0009607                                                         | Defense response<br>Response to biotic stimulus                                                                                                                        |
| 10                | 0.34                 | 0.8006   | 2.40              | 0.14              | 0.97 | 1b6fA   | GO:0006952<br>GO:0009607<br>GO:0005737                                           | Defense response<br>Response to biotic stimulus<br>Cytoplasm                                                                                                           |
| <b>Isoform X2</b> |                      |          |                   |                   |      |         |                                                                                  |                                                                                                                                                                        |
| Rank              | Cscore <sup>GO</sup> | TM-score | RMSD <sup>a</sup> | IDEN <sup>a</sup> | Cov  | PDB hit | Associated GO terms                                                              | GO term names                                                                                                                                                          |
| 1                 | 0.45                 | 0.8124   | 2.27              | 0.13              | 0.96 | 2bk0A   | GO:0006952<br>GO:0009607                                                         | Defense response<br>Response to biotic stimulus                                                                                                                        |
| 2                 | 0.44                 | 0.7987   | 2.56              | 0.12              | 0.97 | 3ie5B   | GO:0006952<br>GO:0009607                                                         | Defense response<br>Response to biotic stimulus                                                                                                                        |
| 3                 | 0.44                 | 0.7715   | 2.96              | 0.12              | 0.97 | 2k7hA   | GO:0006952<br>GO:0009607                                                         | Defense response<br>Response to biotic stimulus                                                                                                                        |
| 4                 | 0.42                 | 0.7978   | 2.48              | 0.07              | 0.97 | 1ifvA   | GO:0006952<br>GO:0016787<br>GO:0009607                                           | Defense response<br>Hydrolase activity<br>Response to biotic stimulus                                                                                                  |
| 5                 | 0.42                 | 0.7827   | 2.48              | 0.13              | 0.95 | 2wqlA   | GO:0006952<br>GO:0009607                                                         | Defense response<br>Response to biotic stimulus                                                                                                                        |
| 6                 | 0.41                 | 0.8107   | 2.34              | 0.11              | 0.96 | 1b6fA   | GO:0006952<br>GO:0005737<br>GO:0009607                                           | Defense response<br>Cytoplasm<br>Response to biotic stimulus                                                                                                           |
| 7                 | 0.38                 | 0.7721   | 2.78              | 0.07              | 0.96 | 1icxA   | GO:0009607<br>GO:0006952                                                         | Response to biotic stimulus<br>Defense response                                                                                                                        |
| 8                 | 0.37                 | 0.6762   | 1.90              | 0.16              | 0.76 | 1vjhA   | GO:0009607<br>GO:0006952                                                         | Response to biotic stimulus<br>Defense response                                                                                                                        |
| 9                 | 0.37                 | 0.8288   | 2.24              | 0.14              | 0.97 | 1e09A   | GO:0009607<br>GO:0006952                                                         | Response to biotic stimulus<br>Defense response                                                                                                                        |
| 10                | 0.36                 | 0.8242   | 2.28              | 0.07              | 0.97 | 1tw0A   | GO:0009607<br>GO:0006952                                                         | Response to biotic stimulus<br>Defense response                                                                                                                        |
| <b>Isoform X3</b> |                      |          |                   |                   |      |         |                                                                                  |                                                                                                                                                                        |
| Rank              | Cscore <sup>GO</sup> | TM-score | RMSD <sup>a</sup> | IDEN <sup>a</sup> | Cov  | PDB hit | Associated GO terms                                                              | GO term names                                                                                                                                                          |
| 1                 | 0.44                 | 0.8152   | 2.28              | 0.12              | 0.96 | 2bk0A   | GO:0006952                                                                       | Defense response                                                                                                                                                       |

|    |      |        |      |      |      |       |                                                                                                              |                                                                                                                                                                                                         |
|----|------|--------|------|------|------|-------|--------------------------------------------------------------------------------------------------------------|---------------------------------------------------------------------------------------------------------------------------------------------------------------------------------------------------------|
|    |      |        |      |      |      |       | GO:0009607                                                                                                   | Response to biotic stimulus                                                                                                                                                                             |
| 2  | 0.42 | 0.8110 | 2.50 | 0.12 | 0.97 | 1b6fA | GO:0006952<br>GO:0005737<br>GO:0009607                                                                       | Defense response<br>Cytoplasm<br>Response to biotic stimulus                                                                                                                                            |
| 3  | 0.41 | 0.7883 | 2.47 | 0.14 | 0.95 | 2wqlA | GO:0006952<br>GO:0009607                                                                                     | Defense response<br>Response to biotic stimulus                                                                                                                                                         |
| 4  | 0.39 | 0.7745 | 2.69 | 0.12 | 0.95 | 3rt0C | GO:0005575<br>GO:0005634<br>GO:0005515<br>GO:0010427<br>GO:0004872<br>GO:0042803<br>GO:0005737<br>GO:0009738 | Cellular component<br>Nucleus<br>Protein binding<br>Abscisic acid binding<br>Signaling receptor activity<br>Protein homodimerization activity<br>Cytoplasm<br>Abscisic acid-activated signaling pathway |
| 5  | 0.37 | 0.7656 | 2.85 | 0.07 | 0.96 | 1icxA | GO:0006952<br>GO:0009607                                                                                     | Defense response<br>Response to biotic stimulus                                                                                                                                                         |
| 6  | 0.36 | 0.6730 | 1.93 | 0.16 | 0.76 | 1vjhA | GO:0006952<br>GO:0009607                                                                                     | Defense response<br>Response to biotic stimulus                                                                                                                                                         |
| 7  | 0.36 | 0.8285 | 2.26 | 0.13 | 0.97 | 1e09A | GO:0006952<br>GO:0009607                                                                                     | Defense response<br>Response to biotic stimulus                                                                                                                                                         |
| 8  | 0.35 | 0.8227 | 2.30 | 0.07 | 0.97 | 1tw0A | GO:0006952<br>GO:0009607                                                                                     | Defense response<br>Response to biotic stimulus                                                                                                                                                         |
| 9  | 0.35 | 0.8304 | 2.26 | 0.10 | 0.95 | 2flhB | GO:0006952<br>GO:0009607                                                                                     | Defense response<br>Response to biotic stimulus                                                                                                                                                         |
| 10 | 0.34 | 0.7934 | 2.62 | 0.12 | 0.97 | 3ie5B | GO:0006952<br>GO:0009607                                                                                     | Defense response<br>Response to biotic stimulus                                                                                                                                                         |
